# Supplementary material for: First asymmetric synthesis of planar chiral [2.2]metacyclophanes
Source: Royal Society of Chemistry journal article supplement (doi:10.1039/c3cc42275e), 2013-01-01
Supplement: c3cc42275e.pdf [file c3cc42275e.pdf]

Supporting Information for

**First asymmetric synthesis of planar chiral  
[2.2]metacyclophanes**

*Marco Blangetti, Helge Müller-Bunz and Donal F. O'Shea\**

Centre for Synthesis and Chemical Biology, School of Chemistry and Chemical Biology,

University College Dublin, Belfield, Dublin 4, Ireland

donal.f.oshea@ucd.ie

**Table of Contents**

|                                                                                                               |         |
|---------------------------------------------------------------------------------------------------------------|---------|
| Experimental details, synthesis and analysis of compounds <b>8a-c</b> , <b>9a-c</b>                           | S2-S7   |
| Enantioselective <i>ortho</i> -lithiation of compounds <b>9a-c</b>                                            | S8-S9   |
| Synthesis and Analysis of compounds <b>11a-k</b>                                                              | S10-S23 |
| <sup>1</sup> H, <sup>31</sup> P and <sup>13</sup> C NMR spectra of <b>8a-c</b> , <b>9a-c</b> and <b>11a-k</b> | S24-S44 |
| Synthesis and Analysis of compound <b>9a-D<sub>1</sub></b>                                                    | S45     |
| <sup>1</sup> H, <sup>2</sup> H and <sup>13</sup> C NMR spectra of <b>9a-D<sub>1</sub></b>                     | S46-S47 |
| Racemization Plots Data for Compounds <b>11a-c</b>                                                            | S48-51  |
| References                                                                                                    | S52     |
| X-Ray structural data for ( <b>R<sub>p</sub></b> )- <b>11a</b> and <i>rac</i> - <b>11d</b>                    | S53-S64 |

## Experimental details

**General Methods:** All reactions involving air-sensitive reagents were performed under nitrogen in oven-dried glassware using syringe-septum cap technique. All solvents were purified and degassed before use. Chromatographic separations were carried out under pressure on Merck silica gel 60 using flash-column techniques. Reactions were monitored by thin-layer chromatography (TLC) carried out on 0.25 mm silica gel coated aluminum plates (60 Merck F254) with UV light (254 nm) as visualizing agent. Unless specified, all reagents were used as received without further purifications. TMP(H) was distilled from CaH<sub>2</sub> prior to use. THF and diethyl ether were obtained from a solvent purification system. Heptane was distilled under nitrogen from CaH<sub>2</sub> prior to use. BuLi was purchased as a 2.5 M solution in hexanes, *s*BuLi as a 1.4 M solution in cyclohexanes. KO<sup>*t*</sup>Bu was purchased as a 1 M solution in THF. The exact concentration of the organolithium solutions were determined by titration with diphenylacetic acid in THF prior to use.<sup>1</sup> (-)-Sparteine and PMDTA were stored over potassium hydroxide. <sup>1</sup>H NMR, <sup>13</sup>C NMR and <sup>31</sup>P NMR spectra were recorded at room temperature on 400 MHz or 500 MHz spectrometers and calibrated using residual undeuterated solvent as an internal reference. <sup>2</sup>H NMR (92.07 MHz) spectra were obtained in DCM using residual CD<sub>2</sub>Cl<sub>2</sub> as an internal standard. Optical rotations were measured at 589 nm. Enantiomeric ratios were determined by analytical chiral HPLC analyses on Daicel Chiralpak columns (250 x 4.6 mm ID) using heptane/ethanol as solvent mixtures. Racemates were obtained using *s*BuLi/PMDTA or by racemization of an enantioenriched sample in NMP at 453 K.

## Synthesis and analysis of compounds **8a-c** and **9a-c**.

***N,N*-Diisopropyl-3,5-dimethylbenzamide.**<sup>2</sup> A solution of 3,5-dimethylbenzoic acid (3.00 g, 20 mmol) in thionyl chloride (14.5 mL, 200 mmol) was refluxed for 24 h. The excess thionyl chloride was distilled off by azeotropic distillation with toluene. The residue was dissolved in dry THF (50 mL), diisopropyl amine (14.0 mL, 100 mmol) added dropwise and stirred for 30 minutes at room temperature. The reaction mixture was filtered and the filtrate dried under reduced pressure. Dichloromethane (40 mL) was added and washed with HCl (2 M, 3 x 20 mL), dried over sodium sulfate and concentrated to dryness. Filtration over a short silica plug eluting with 1:1 cyclohexane:ethyl acetate gave a yellow solid ( $R_f = 0.50$ , 3.49 g, 75 %), mp 79-81 °C. <sup>1</sup>H NMR (500 MHz, CDCl<sub>3</sub>) δ 6.98 (s, 1H), 6.90 (s, 2H), 4.05-3.32 (br, 2H), 2.31 (s, 6H), 1.72-0.92 (br, 12H). <sup>13</sup>C NMR (100 MHz, CDCl<sub>3</sub>) δ 171.3, 138.9, 138.0, 130.0, 123.1, 50.7, 45.7, 21.2, 20.7. ESI-HRMS [M+H]<sup>+</sup>: 234.1868, C<sub>15</sub>H<sub>24</sub>NO requires 234.1858.

**1-Methoxy-3-methyl-5-(3-methylphenethyl)benzene (8a).**<sup>3</sup> A solution of *m*-xylene (1.06 g, 10.0 mmol) and 1-methoxy-3,5-dimethylbenzene (0.71 mL, 5.00 mmol) in THF (50 mL) at -78 °C was treated dropwise with BuLi (2.26 M, 7.30 mL, 16.5 mmol) and stirred for 5 min. KO<sup>t</sup>Bu (1.0 M in THF, 16.5 mL, 16.5 mmol) was added dropwise followed by 2,2,6,6-tetramethylpiperidine (2.78 mL, 15.0 mmol). The reaction mixture was stirred for 15 min at -78 °C, 1,2-dibromoethane (2.14 mL, 25.0 mmol) added and stirred for a further 5 min. The reaction mixture was warmed to rt and the solvent was removed under reduced pressure. Diethyl ether (30 mL) was added to the residue, washed with HCl (2 M, 3 x 10 mL), dried over sodium sulfate and concentrated to dryness. Purification by silica gel chromatography eluting with 98:2 pentane:diethyl ether gave **8a** as a colourless oil ( $R_f = 0.65$ , 481 mg, 40%). <sup>1</sup>H NMR (500 MHz, CDCl<sub>3</sub>) δ 7.17 (t,  $J = 7.5$  Hz, 1H), 7.05–6.98 (m, 3H), 6.63 (s, 1H), 6.56 (d,  $J = 7.5$  Hz, 2H), 3.76 (s, 3H), 2.85 (br s, 4H), 2.33 (s, 3H), 2.30 (s, 3H). <sup>13</sup>C NMR (125 MHz, CDCl<sub>3</sub>) δ 159.7, 143.4, 141.9, 139.3, 137.9, 129.2, 128.2, 126.6,

125.4, 121.8, 112.2, 111.1, 55.1, 38.1, 37.9, 21.5, 21.4; ESI-HRMS  $[M+H]^+$ : 241.1595,  $C_{17}H_{21}O$  requires 241.1592.

***N,N*-Diisopropyl-3-methyl-5-(3-methylphenethyl)benzamide (8b)**. A solution of *m*-xylene (1.06 g, 10.0 mmol) and *N,N*-diisopropyl-3,5-dimethylbenzamide (1.16 g, 5.0 mmol) in THF (50 mL) at -78 °C was treated dropwise with BuLi (2.50 M, 8.0 mL, 20.0 mmol) and stirred for 5 min. A solution of KO $t$ Bu (1.0 M in THF, 20.0 mL, 20.0 mmol) in THF (25 mL) was added dropwise followed by 2,2,6,6-tetramethylpiperidine (3.37 mL, 20.0 mmol). The reaction mixture was stirred for 15 min at -78 °C, 1,2-dibromoethane (2.14 mL, 25.0 mmol) added and stirred for a further 5 min. The reaction mixture was warmed to rt and the solvent was removed under reduced pressure. Ethyl acetate (30 mL) was added to the residue, washed with HCl (2 M, 3 x 20 mL), dried over sodium sulfate and concentrated to dryness. Purification by silica gel chromatography eluting with 60:40 pentane:diethyl ether gave **8b** as a colorless oil ( $R_f = 0.65$ , 491 mg, 30%).  $^1H$  NMR (400 MHz,  $CDCl_3$ )  $\delta$  7.15 (t,  $J = 7.8$  Hz, 1H), 7.01-6.90 (m, 6H), 3.97-3.37 (br, 2H), 2.86 (s, 4H), 2.32 (s, 3H) superimposed to 2.31 (s, 3H), 1.65-0.96 (br, 12H).  $^{13}C$  NMR (100 MHz,  $CDCl_3$ )  $\delta$  171.3, 142.0, 141.6, 139.0, 138.1, 137.8, 129.5, 129.2, 128.2, 126.6, 125.4, 123.8, 122.5, 37.8, 37.7, 21.4, 21.3, 20.7. (Note: *i*-Pr tertiary C not observed). ESI-HRMS  $[M+H]^+$ : 338.2480,  $C_{23}H_{32}NO$  requires 338.2484.

**1,2-Bis(3-methoxy-5-methylphenyl)ethane (8c)**.<sup>3</sup> A solution of 1-methoxy-3,5-dimethylbenzene (204 mg, 1.50 mmol) in THF (15 mL) at -78 °C was treated dropwise with BuLi (2.40 M, 0.69 mL, 1.65 mmol) and stirred for 5 min. KO $t$ Bu (1.0 M in THF, 1.65 mL, 1.65 mmol) was added dropwise followed by 2,2,6,6-tetramethylpiperidine (0.25 mL, 1.50 mmol). The reaction mixture was stirred for 15 min at -78 °C, 1,2-dibromoethane (0.39 mL, 4.50 mmol) added and stirred for a further 5 min. The reaction mixture was warmed to rt and the solvent was removed under reduced pressure.

Diethyl ether (30 mL) was added to the residue, washed with HCl (2 M, 3 x 10 mL), dried over sodium sulfate and concentrated to dryness. Purification by silica gel chromatography eluting with 98:2 cyclohexane:ethyl acetate gave **8c** as a colourless solid ( $R_f = 0.50$ , 186 mg, 92%), mp 80-81 °C.  $^1\text{H}$  NMR (500 MHz,  $\text{CDCl}_3$ )  $\delta$  6.65 (s, 2H), 6.58–6.57 (m, 4H), 3.78 (s, 6H), 2.85 (s, 4H), 2.32 (s, 6H).  $^{13}\text{C}$  NMR (125 MHz,  $\text{CDCl}_3$ )  $\delta$  159.69, 143.30, 139.28, 121.75, 112.19, 111.11, 55.11, 37.94, 21.50; ESI-HRMS  $[\text{M}+\text{Na}]^+$ : 293.1510,  $\text{C}_{18}\text{H}_{22}\text{O}_2\text{Na}$  requires 293.1517.

**5-Methoxy[2.2]metacyclophane (9a).**<sup>3,4</sup> A solution of 1-methoxy-3-methyl-5-(3-methylphenethyl)benzene **8a** (481 mg, 2.00 mmol) in THF (30 mL) at -78 °C was treated dropwise with BuLi (2.26 M, 2.50 mL, 5.00 mmol) and stirred for 5 min. KO $t$ Bu (1.0 M in THF, 5.00 mL, 5.00 mmol) was added dropwise followed by 2,2,6,6-tetramethylpiperidine (0.67 mL, 4.00 mmol). The reaction mixture was stirred for 30 min during which time the temperature was raised to -60 °C. 1,2-Dibromoethane (0.51 mL, 15.0 mmol) was added, the reaction mixture was warmed to rt and the solvent was removed under reduced pressure. Diethyl ether (30 mL) was added to the residue, washed with HCl (2 M, 3 x 10 mL), dried over sodium sulfate and concentrated to dryness. Purification by silica gel chromatography eluting with 99:1 cyclohexane:diethyl ether gave **9a** as a colourless solid ( $R_f = 0.55$ , 200 mg, 42%), mp 83-85 °C.  $^1\text{H}$  NMR (500 MHz,  $\text{CDCl}_3$ )  $\delta$  7.25 (t,  $J = 7.4$  Hz, 1H), 7.03 (dd,  $J = 7.4, 1.4$  Hz, 2H), 6.64 (d,  $J = 0.9$  Hz, 2H), 4.38 (s, 1H), 3.98 (s, 1H), 3.84 (s, 3H), 3.05 (m, 4H), 2.12 (m, 4H).  $^{13}\text{C}$  NMR (125 MHz,  $\text{CDCl}_3$ )  $\delta$  160.7, 140.4, 138.9, 136.2, 129.9, 128.5, 125.3, 110.8, 55.3, 41.1, 40.9; EI-HRMS  $[\text{M}]^+$ : 238.1359,  $\text{C}_{17}\text{H}_{18}\text{O}$  requires 238.1358.

***N,N*-Diisopropyl[2.2]metacyclophane-5-carboxamide (9b).** A solution of *N,N*-diisopropyl-3-methyl-5-(3-methylphenethyl)benzamide **8b** (472 mg, 1.40 mmol) in THF (30 mL) at -78 °C was treated dropwise with BuLi (2.50 M, 1.40 mL, 5.60 mmol) and stirred for 5 min. A solution of KO $t$ Bu (1.0 M in THF, 5.60 mL, 5.60 mmol) was added dropwise followed by 2,2,6,6-

tetramethylpiperidine (0.95 mL, 5.60 mmol). The reaction mixture was stirred for 30 min during which time the temperature was raised to -60 °C. 1,2-Dibromoethane (0.72 mL, 8.40 mmol) was added, the reaction mixture was warmed to rt and the solvent was removed under reduced pressure. Ethyl acetate (30 mL) was added to the residue, washed with HCl (2 M, 3 x 10 mL), dried over sodium sulfate and concentrated to dryness. Purification by silica gel chromatography eluting with 3:2 pentane:diethyl ether gave **9b** as a colourless solid ( $R_f = 0.65$ , 144 mg, 31%), mp 65-67 °C.  $^1\text{H}$  NMR (400 MHz,  $\text{CDCl}_3$ )  $\delta$  7.27 (t,  $J = 7.5$  Hz, 1H), 7.06 (d,  $J = 1.3$  Hz, 3H), 7.04 (d,  $J = 1.5$  Hz, 1H), 4.39 (s, 1H), 4.24 (s, 1H), 3.92-3.41 (br, 2H), 3.15-3.03 (m, 4H), 2.19-2.05 (m, 4H), 1.74-0.93 (br, 12H).  $^{13}\text{C}$  NMR (100 MHz,  $\text{CDCl}_3$ )  $\delta$  171.5, 139.6, 138.7, 138.6, 137.0, 136.8, 129.0, 125.4, 122.9, 40.9, 40.5, 20.7. (Note: *i*-Pr tertiary C not observed). ESI-HRMS  $[\text{M}+\text{H}]^+$ : 336.2314,  $\text{C}_{23}\text{H}_{30}\text{NO}$  requires 336.2327.

**5,13-Dimethoxy[2.2]metacyclophane (9c).**<sup>3,5</sup> A solution of 1,2-bis(3-methoxy-5-methylphenyl)ethane **8c** (354 mg, 1.31 mmol) in THF (30 mL) at -78 °C was treated dropwise with BuLi (2.50 M, 1.31 mL, 3.28 mmol) and stirred for 5 min. KO<sup>*t*</sup>Bu (1.0 M in THF, 3.28 mL, 3.28 mmol) was added dropwise followed by 2,2,6,6-tetramethylpiperidine (0.44 mL, 2.62 mmol). The reaction mixture was stirred for 30 min during which time the temperature was raised to -60 °C. 1,2-Dibromoethane (0.34 mL, 3.93 mmol) was added, the reaction mixture was warmed to rt and the solvent was removed under reduced pressure. Diethyl ether (30 mL) was added to the residue, washed with HCl (2 M, 3 x 10 mL), dried over sodium sulfate and concentrated to dryness. Purification by silica gel chromatography eluting with 94:6 pentane:ethyl acetate gave **9c** as a colourless solid ( $R_f = 0.70$ , 123 mg, 35%), mp 166-169 °C (lit.<sup>6</sup> mp 168-170 °C).  $^1\text{H}$  NMR (500 MHz,  $\text{CDCl}_3$ )  $\delta$  6.62 (s, 4H), 4.08 (s, 2H), 3.83 (s, 6H), 3.06–2.96 (m, 4H), 2.18–2.08 (m, 4H).  $^{13}\text{C}$  NMR (125 MHz,  $\text{CDCl}_3$ )  $\delta$  160.5, 140.4, 129.5, 110.8, 55.3, 41.0; EI-HRMS  $[\text{M}]^+$ : 268.1460,  $\text{C}_{18}\text{H}_{20}\text{O}_2$  requires 268.1463.

## Enantioselective *o*-lithiation of [2.2]metacyclophanes **9a-c**

**General procedure.** A solution of [2.2]metacyclophane **9** (0.10 mmol) in dry diethyl ether or dry heptane was treated with (-)-sparteine (46  $\mu$ L, 0.20 mmol) and the mixture was stirred for 5 min. After cooling to the specified temperature, BuLi (2.50 M, 80  $\mu$ L, 0.20 mmol) or *s*BuLi (1.40 M, 150  $\mu$ L, 0.20 mmol) were added dropwise and the reaction mixture stirred for the required time. The reaction mixture was cooled to -78 °C and ethyl chloroformate (30  $\mu$ L, 0.30 mmol) added dropwise. The reaction mixture was stirred for the specified time and the solvent was removed under reduced pressure. Ethyl acetate (10 mL) was added to the residue, washed with HCl (2 M, 2 x 10 mL), dried over sodium sulfate and concentrated to dryness. The crude products were purified by silica gel chromatography followed by chiral HPLC analyses (Chiralpak IA 250 x 4.6 mm ID, 254nm UV detector, room temperature).

Tabulated results:

| Entry | Cyclophane | RLi           | T (°C) | solvent | product    | yield (%) | e.r.  |
|-------|------------|---------------|--------|---------|------------|-----------|-------|
| 1     | <b>9a</b>  | BuLi          | -78    | ether   | <b>11a</b> | -         | -     |
| 2     | <b>9a</b>  | BuLi          | rt     | ether   | <b>11a</b> | 15        | 72:18 |
| 3     | <b>9a</b>  | <i>s</i> BuLi | rt     | ether   | <b>11a</b> | 51        | 81:19 |
| 4     | <b>9a</b>  | <i>s</i> BuLi | -78    | ether   | <b>11a</b> | 18        | 82:18 |
| 5     | <b>9a</b>  | <i>s</i> BuLi | -60    | ether   | <b>11a</b> | 43        | 89:11 |
| 6     | <b>9a</b>  | <i>s</i> BuLi | -40    | ether   | <b>11a</b> | 65        | 91:9  |
| 7     | <b>9a</b>  | <i>s</i> BuLi | -20    | ether   | <b>11a</b> | 58        | 85:15 |
| 8     | <b>9a</b>  | <i>s</i> BuLi | 0      | heptane | <b>11a</b> | -         | -     |
| 9     | <b>9b</b>  | BuLi          | -40    | ether   | <b>11b</b> | -         | -     |
| 10    | <b>9b</b>  | <i>s</i> BuLi | 0      | heptane | <b>11b</b> | -         | -     |
| 11    | <b>9b</b>  | <i>s</i> BuLi | -40    | ether   | <b>11b</b> | 73        | 74:26 |
| 12    | <b>9b</b>  | <i>s</i> BuLi | -78    | ether   | <b>11b</b> | 76        | 85:15 |
| 13    | <b>9c</b>  | BuLi          | -78    | ether   | <b>11c</b> | -         | -     |
| 14    | <b>9c</b>  | <i>s</i> BuLi | -40    | ether   | <b>11c</b> | 46        | 91:9  |

## HPLC Analysis for Table 2

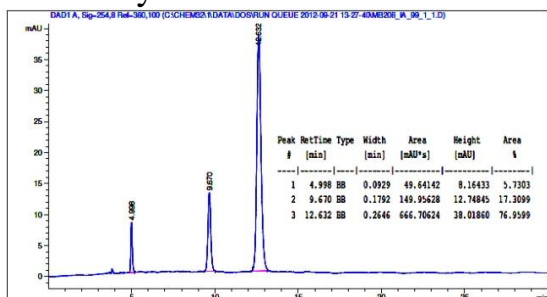

Entry 2. 11a

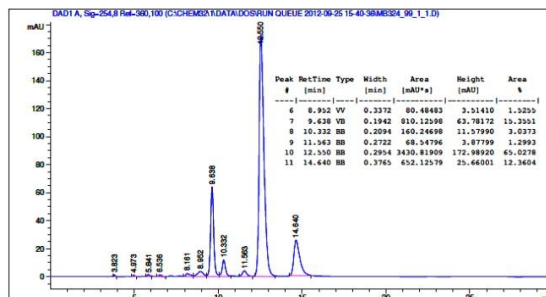

Entry 3. 11a

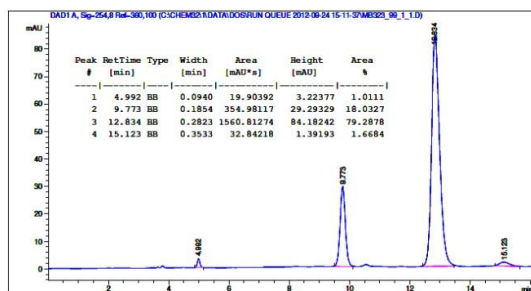

Entry 4. 11a

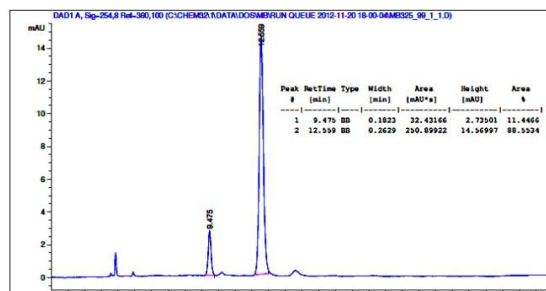

Entry 5. 11a

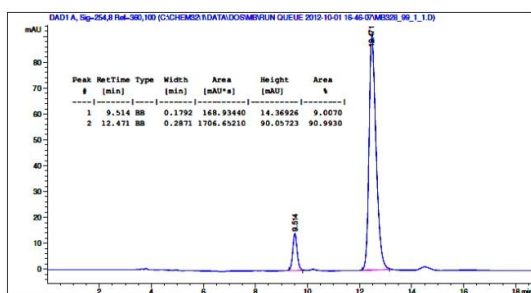

Entry 6. 11a

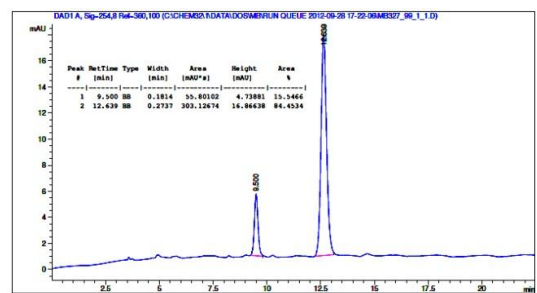

Entry 7. 11a

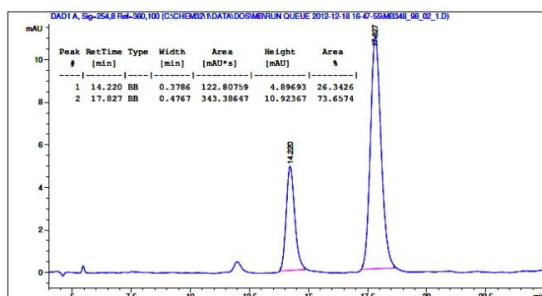

Entry 11. 11b

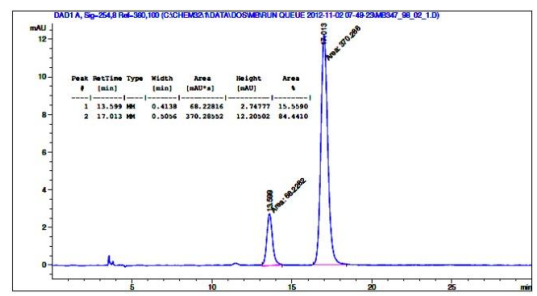

Entry 12. 11b

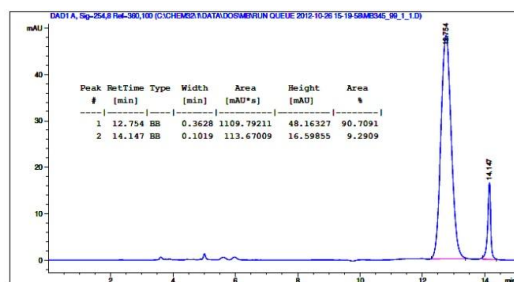

Entry 14. 11c

**11a:** Eluent: 1% ethanol in heptane, flow rate: 1.0 ml/min. Retention times: 9.7 min (minor isomer) and 12.8 min (major isomer).

**11b:** Eluent: 2% ethanol in heptane, flow rate: 1.0 ml/min. Retention times: 13.6 min (minor isomer) and 17.0 min (major isomer).

**11c:** Eluent: 1% ethanol in heptane, flow rate: 1.0 ml/min. Retention times: 12.7 min (major isomer) and 14.1 min (minor isomer).



## Synthesis and analysis of compounds **11a-k**

**(R<sub>p</sub>)-(-)-5-Methoxy[2.2]metacyclophane-4-carboxylic acid ethyl ester (11a).** A solution of 5-methoxy[2.2]metacyclophane **9a** (23.8 mg, 0.10 mmol) in dry diethyl ether (1 mL) was treated with (-)-sparteine (46 μL, 0.20 mmol) and the mixture was stirred for 5 min. After cooling to -40 °C, *s*BuLi (150 μL, 0.20 mmol) was added dropwise and the reaction mixture stirred at -40 °C for 4 h. The reaction mixture was cooled to -78 °C and ethyl chloroformate (30 μL, 0.30 mmol) added dropwise. The reaction mixture was stirred at room temperature for 1 h and the solvent was removed under reduced pressure. Ethyl acetate (10 mL) was added to the residue, washed with HCl (2 M, 2 x 10 mL), dried over sodium sulfate and concentrated to dryness. Purification by silica gel chromatography eluting with 70:30 pentane:diethyl ether gave **11a** as a colourless solid (*R<sub>f</sub>* = 0.60, 20 mg, 65%), mp 70-72 °C. <sup>1</sup>H NMR (500 MHz, CDCl<sub>3</sub>) δ 7.27 (t, *J* = 7.5 Hz, 1H), 7.04 (d, *J* = 7.5 Hz, 2H), 6.66 (s, 1H), 4.53 (s, 1H), 4.50-4.36 (m, 2H), 3.94 (s, 1H), 3.86 (s, 3H), 3.15 (dt, *J* = 12.5, 3.5 Hz, 1H), 3.11 (dt, *J* = 5.8, 3.1 Hz, 1H), 3.08-3.00 (m, 2H), 2.38 (td, *J* = 12.2, 3.5 Hz, 1H), 2.20-2.04 (m, 2H), 1.95 (td, *J* = 12.4, 3.6 Hz, 1H), 1.41 (t, *J* = 7.1 Hz, 3H). <sup>13</sup>C NMR (125 MHz, CDCl<sub>3</sub>) δ 168.5, 157.3, 141.3, 139.0, 138.6, 137.0, 136.3, 129.9, 128.8, 125.6, 125.3, 120.8, 108.5, 61.1, 56.1, 41.3, 40.6, 39.8, 38.7, 14.4. EI-HRMS [*M*]<sup>+</sup>: 310.1555, C<sub>20</sub>H<sub>22</sub>O<sub>3</sub> requires 310.1569. [*α*]<sub>D</sub><sup>20</sup> = -20.3 (c 0.4, CHCl<sub>3</sub>, 82% ee). Enantiomeric excess was determined by analytical chiral HPLC (Chiralpak IA 250 x 4.6 mm ID, 254nm UV detector, room temperature, eluent: 1% ethanol in heptane, flow rate: 1.0 ml/min). Retention times: 9.7 min (minor isomer) and 12.8 min (major isomer).

### HPLC of racemic **11a**

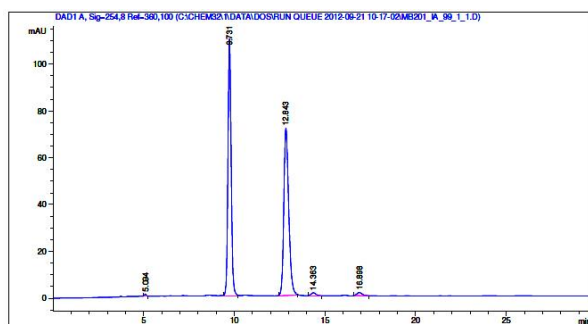

Area Percent Report

Sorted By : Signal  
 Multiplier : 1.0000  
 Dilution : 1.0000  
 Use Multiplier & Dilution Factor with ISTDs

Signal 1: DAD1 A, Sig=254,8 Ref=360,100

| Peak # | RetTime [min] | Type | Width [min] | Area [mAU*s] | Height [mAU] | Area %  |
|--------|---------------|------|-------------|--------------|--------------|---------|
| 1      | 5.094         | BB   | 0.0958      | 6.18696      | 1.00515      | 0.2265  |
| 2      | 9.731         | BB   | 0.1851      | 1326.16968   | 109.61988    | 48.5556 |
| 3      | 12.843        | BB   | 0.2905      | 1348.10811   | 71.34035     | 49.3617 |
| 4      | 14.363        | BB   | 0.2797      | 23.06743     | 1.27126      | 0.8446  |
| 5      | 16.898        | BB   | 0.3177      | 27.62957     | 1.33345      | 1.0116  |

### HPLC of **11a**

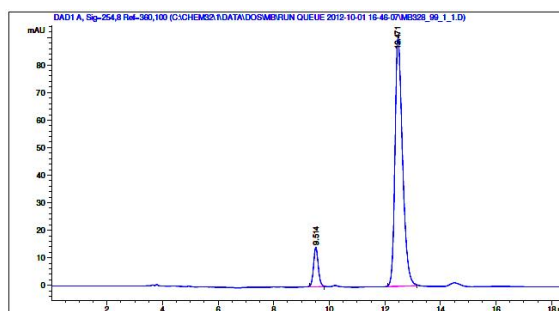

Area Percent Report

Sorted By : Signal  
 Multiplier : 1.0000  
 Dilution : 1.0000  
 Use Multiplier & Dilution Factor with ISTDs

Signal 1: DAD1 A, Sig=254,8 Ref=360,100

| Peak #   | RetTime [min] | Type | Width [min] | Area [mAU*s] | Height [mAU] | Area %  |
|----------|---------------|------|-------------|--------------|--------------|---------|
| 1        | 9.514         | BB   | 0.1792      | 168.93440    | 14.36926     | 9.0070  |
| 2        | 12.471        | BB   | 0.2871      | 1706.65210   | 90.05723     | 90.9930 |
| Totals : |               |      |             | 1875.58650   | 104.42649    |         |

### (*R<sub>p</sub>*)-(-)-5-(*N,N*-Diisopropylcarbamoyl)[2.2]metacyclophane-4-carboxylic acid ethyl ester (**11b**).

A solution of *N,N*-diisopropyl[2.2]metacyclophane-5-carboxamide **9b** (33.5 mg, 0.10 mmol) in dry diethyl ether (1 mL) was treated with (-)-sparteine (46  $\mu$ L, 0.20 mmol) and the mixture was stirred for 5 min. After cooling to -78  $^{\circ}$ C, *s*BuLi (150  $\mu$ L, 0.20 mmol) was added dropwise and the reaction mixture stirred at -78  $^{\circ}$ C for 4 h. Ethyl chloroformate (30  $\mu$ L, 0.30 mmol) was added dropwise, the reaction mixture was stirred at room temperature for 1 h and the solvent was removed under reduced pressure. Ethyl acetate (10 mL) was added to the residue, washed with HCl (2 M, 2 x 10 mL), dried over sodium sulfate and concentrated to dryness. Purification by silica gel chromatography eluting with 3:2 pentane:diethyl ether gave **11b** as a colourless solid ( $R_f$  = 0.50, 31 mg, 76%), mp 120-121  $^{\circ}$ C.  $^1\text{H}$  NMR (500 MHz,  $\text{CDCl}_3$ )  $\delta$  7.31 (t,  $J$  = 7.5 Hz, 1H), 7.09 (d,  $J$  = 7.5 Hz, 1H), 7.07 (d,  $J$  = 7.4 Hz, 1H), 6.96 (s, 1H), 4.60-4.48 (br, 1H), 4.44 (dt,  $J$  = 17.0, 7.2 Hz, 1H), 4.31 (dt,  $J$  = 17.5, 7.0 Hz, 1H), 4.24 (s, 1H), 3.77-3.62 (m, 1H), 3.61-3.43 (m, 2H), 3.18-3.05 (m, 3H), 2.60-2.40 (br, 1H), 2.22-2.06 (m, 2H), 1.91 (td,  $J$  = 12.0, 3.1 Hz, 1H), 1.56 (d,  $J$  = 6.4 Hz, 6H), 1.39 (t,  $J$  = 7.1 Hz, 3H), 1.20-1.05 (m, 6H).  $^{13}\text{C}$  NMR (100 MHz,  $\text{CDCl}_3$ )  $\delta$  170.1, 167.9, 139.5, 139.2, 138.1, 137.3, 129.3, 126.8, 125.7, 125.3, 122.7, 61.2, 51.1, 45.6, 40.9, 39.8, 39.1, 20.4, 14.3.

ESI-HRMS  $[M+H]^+$ : 408.2546,  $C_{26}H_{34}NO_3$  requires 408.2539.  $[\alpha]_D^{20} = -33.2$  (c 0.6,  $CHCl_3$ , 69% ee). Enantiomeric excess was determined by analytical chiral HPLC (Chiralpak IA 250 x 4.6 mm ID, 254nm UV detector, room temperature, eluent: 2% ethanol in heptane, flow rate: 1.0 ml/min). Retention times: 13.6 min (minor isomer) and 17.0 min (major isomer).

HPLC chart of *racemic 11b*

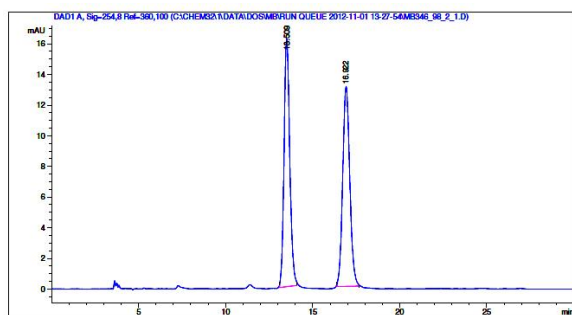

Area Percent Report

Sorted By : Signal  
Multiplier : 1.0000  
Dilution : 1.0000  
Use Multiplier & Dilution Factor with ISTDs

Signal 1: DAD1 A, Sig=254,8 Ref=360,100

| Peak # | RetTime [min] | Type | Width [min] | Area [mAU*s] | Height [mAU] | Area %  |
|--------|---------------|------|-------------|--------------|--------------|---------|
| 1      | 13.599        | BB   | 0.3493      | 368.43286    | 16.20470     | 49.9976 |
| 2      | 16.922        | BB   | 0.4357      | 368.46783    | 13.03800     | 50.0024 |

Totals : 736.90070 29.24271

HPLC chart of **11b**

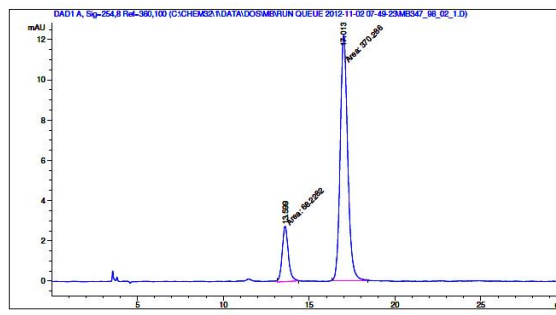

Area Percent Report

Sorted By : Signal  
Multiplier : 1.0000  
Dilution : 1.0000  
Use Multiplier & Dilution Factor with ISTDs

Signal 1: DAD1 A, Sig=254,8 Ref=360,100

| Peak # | RetTime [min] | Type | Width [min] | Area [mAU*s] | Height [mAU] | Area %  |
|--------|---------------|------|-------------|--------------|--------------|---------|
| 1      | 13.599        | BB   | 0.4138      | 68.22816     | 2.74777      | 15.5590 |
| 2      | 17.013        | BB   | 0.5056      | 370.28552    | 12.20502     | 84.4410 |

Totals : 438.51368 14.95279

**(*R*<sub>p</sub>)-(-)-5,13-Dimethoxy[2.2]metacyclophane-4-carboxylic acid ethyl ester (11c)**. A solution of 5,13-dimethoxy[2.2]metacyclophane **9c** (26.8 mg, 0.10 mmol) in dry diethyl ether (4 mL) was treated with (-)-sparteine (46  $\mu$ L, 0.20 mmol) and the mixture was stirred for 5 min. After cooling to  $-40^\circ\text{C}$ , *s*BuLi (150  $\mu$ L, 0.20 mmol) was added dropwise and the reaction mixture stirred at  $-40^\circ\text{C}$  for 4 h. The reaction mixture was cooled to  $-78^\circ\text{C}$  and ethyl chloroformate (30  $\mu$ L, 0.30 mmol) added dropwise. The reaction mixture was stirred at room temperature for 1 h and the solvent was removed under reduced pressure. Ethyl acetate (10 mL) was added to the residue, washed with HCl (2 M, 2 x 10 mL), dried over sodium sulfate and concentrated to dryness. Purification by silica gel chromatography eluting with 99.5:0.5 DCM:MeOH gave **11c** as a colourless solid ( $R_f = 0.50$ , 16 mg, 46%), mp  $74-78^\circ\text{C}$ .  $^1\text{H NMR}$  (500 MHz,  $\text{CDCl}_3$ )  $\delta$  6.64 (s, 1H), 6.62 (s, 2H), 4.50-4.36 (m, 2H), 4.22 (s, 1H), 4.05 (s, 1H), 3.86 (s, 3H), 3.83 (s, 3H), 3.13 (dt,  $J = 12.4, 3.4$  Hz, 1H), 3.07-3.02

(m, 2H), 2.98 (dt,  $J = 12.2, 3.5$  Hz, 1H), 2.36 (td,  $J = 12.2, 3.4$  Hz, 1H), 2.18-2.10 (m, 2H), 2.01 (td,  $J = 12.3, 3.5$  Hz, 1H), 1.41 (t,  $J = 7.1$  Hz, 3H).  $^{13}\text{C}$  NMR (100 MHz,  $\text{CDCl}_3$ )  $\delta$  168.5, 160.7, 157.1, 141.3, 140.5, 140.1, 137.0, 129.6, 120.7, 110.9, 110.8, 108.4, 61.1, 56.0, 55.3, 41.2, 40.7, 39.9, 38.6, 14.3. ESI-HRMS  $[\text{M}+\text{H}]^+$ : 341.1765,  $\text{C}_{21}\text{H}_{25}\text{O}_4$  requires 341.1753.  $[\alpha]_{\text{D}}^{20} = -12.5$  (c 0.3,  $\text{CHCl}_3$ , 82% ee). Enantiomeric excess was determined by analytical chiral HPLC (Chiralpak IA 250 x 4.6 mm ID, 254nm UV detector, room temperature, eluent: 1% ethanol in heptane, flow rate: 1.0 ml/min). Retention times: 12.7 min (major isomer) and 14.1 min (minor isomer).

#### HPLC chart of racemic **11c**

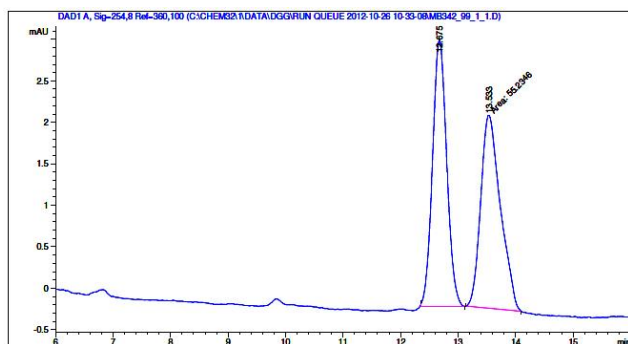

Area Percent Report

Sorted By : Signal  
 Multiplier : 1.0000  
 Dilution : 1.0000  
 Use Multiplier & Dilution Factor with ISTDs

Signal 1: DAD1 A, Sig=254,8 Ref=360,100

| Peak # | RetTime [min] | Type | Width [min] | Area [mAU*s] | Height [mAU] | Area %  |
|--------|---------------|------|-------------|--------------|--------------|---------|
| 1      | 12.675        | BB   | 0.2638      | 54.95518     | 3.20832      | 49.8732 |
| 2      | 13.533        | MM   | 0.3950      | 55.23459     | 2.33072      | 50.1268 |

Totals : 110.18977 5.53904

#### HPLC chart of **11c**

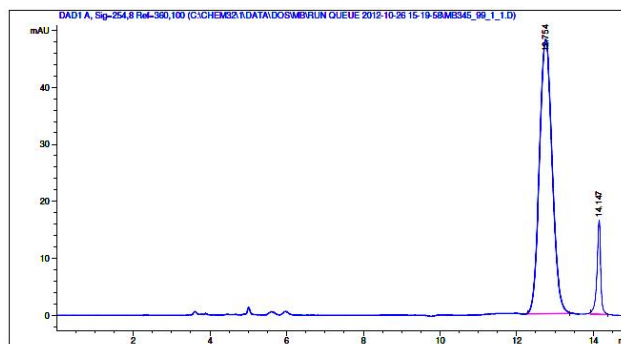

Area Percent Report

Sorted By : Signal  
 Multiplier : 1.0000  
 Dilution : 1.0000  
 Use Multiplier & Dilution Factor with ISTDs

Signal 1: DAD1 A, Sig=254,8 Ref=360,100

| Peak # | RetTime [min] | Type | Width [min] | Area [mAU*s] | Height [mAU] | Area %  |
|--------|---------------|------|-------------|--------------|--------------|---------|
| 1      | 12.754        | BB   | 0.3628      | 1109.79211   | 48.16327     | 90.7091 |
| 2      | 14.147        | BB   | 0.1019      | 113.67009    | 16.59855     | 9.2909  |

Totals : 1223.46220 64.76181

**(*R*<sub>p</sub>)-(-)-5-Methoxy[2.2]metacylophane-4-carboxylic acid (11d).** A solution of (*R*<sub>p</sub>)-5-methoxy[2.2]metacylophane-4-carboxylic acid ethyl ester **11a** (50.0 mg, 0.16 mmol, 91:9 e.r.) in 2-propanol (3 mL) was treated with KOH (20% in 2-propanol, 6 mL) and the mixture was heated at 80 °C for 30 min. After cooling to room temperature, the reaction mixture was quenched with HCl (2 M, 20 mL), ethyl acetate (10 mL) was added, washed with water (2 x 20 mL), dried over sodium sulfate and concentrated to dryness. Purification by silica gel chromatography eluting with ethyl acetate gave **11d** as a colourless solid ( $R_f = 0.50$ , 40 mg, 88%), mp 162-164 °C.  $^1\text{H}$  NMR (500

MHz, CD<sub>3</sub>OD)  $\delta$  7.27 (t,  $J = 7.5$  Hz, 1H), 7.06 (d,  $J = 7.5$  Hz, 2H), 4.49 (s, 1H), 3.94 (s, 1H), 3.88 (s, 3H), 3.25 (dt,  $J = 12.5, 3.5$  Hz, 1H), 3.16-3.09 (m, 2H), 3.04 (dt,  $J = 12.3, 3.5$  Hz, 1H), 2.34 (td,  $J = 12.2, 3.5$  Hz, 1H), 2.20-2.12 (m, 1H), 2.10-2.03 (m, 1H), 1.94 (td,  $J = 12.3, 3.7$  Hz, 1H). <sup>13</sup>C NMR (100 MHz, CDCl<sub>3</sub>)  $\delta$  168.4, 158.3, 143.4, 141.3, 139.4, 138.0, 135.8, 131.9, 129.1, 125.8, 125.2, 116.4, 108.7, 56.6, 41.3, 40.6, 40.1, 39.4. ESI-HRMS [M-H]<sup>-</sup>: 281.1168, C<sub>18</sub>H<sub>17</sub>O<sub>3</sub> requires 281.1178.  $[\alpha]_D^{20} = -5.3$  (c 0.3, MeOH, 82% ee). Enantiomeric excess was determined after esterification followed by analytical chiral HPLC analysis. A solution of 5-methoxy[2,2]metacyclophane-4-carboxylic acid (40 mg, 0.14 mmol) in ethanol (10 mL) was treated with 12 M HCl (three drops) and heated under reflux for 1 h. The solvent was removed under reduced pressure and ethyl acetate (20 mL) was added. The organic layer was washed with saturated NaHCO<sub>3</sub> and water, dried over sodium sulfate and concentrated to dryness. Purification over a short silica plug (70:30 pentane:diethyl ether) gave the corresponding ethyl ester **11a** which was analyzed by chiral HPLC (Chiralpak IA 250 x 4.6 mm ID, 254nm UV detector, room temperature, eluent: 1% ethanol in heptane, flow rate: 1.0 ml/min). Retention times: 9.7 min (minor isomer) and 12.8 min (major isomer).

#### HPLC chart of **11a** before hydrolysis

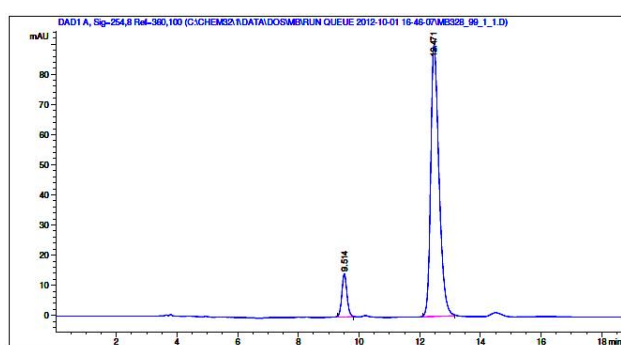

Area Percent Report

Sorted By : Signal  
 Multiplier : 1.0000  
 Dilution : 1.0000  
 Use Multiplier & Dilution Factor with ISTDs

Signal 1: DAD1 A, Sig=254,8 Ref=360,100

| Peak #   | RetTime [min] | Type | Width [min] | Area [mAU*s] | Height [mAU] | Area %  |
|----------|---------------|------|-------------|--------------|--------------|---------|
| 1        | 9.514         | BB   | 0.1792      | 168.93440    | 14.36926     | 9.0070  |
| 2        | 12.471        | BB   | 0.2871      | 1706.65210   | 90.05723     | 90.9930 |
| Totals : |               |      |             | 1875.58650   | 104.42649    |         |

#### HPLC chart of **11a** after hydrolysis and re-esterification.

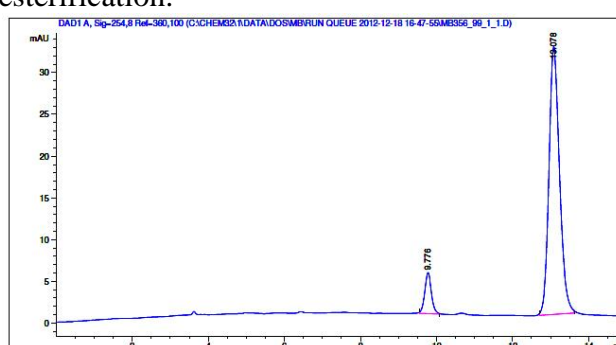

Area Percent Report

Sorted By : Signal  
 Multiplier : 1.0000  
 Dilution : 1.0000  
 Use Multiplier & Dilution Factor with ISTDs

Signal 1: DAD1 A, Sig=254,8 Ref=360,100

| Peak # | RetTime [min] | Type | Width [min] | Area [mAU*s] | Height [mAU] | Area %  |
|--------|---------------|------|-------------|--------------|--------------|---------|
| 1      | 9.776         | BB   | 0.1853      | 59.27991     | 4.89419      | 8.7532  |
| 2      | 13.078        | BB   | 0.2948      | 617.95917    | 32.07657     | 91.2468 |

**(R<sub>p</sub>)-(+)-5-Methoxy[2.2]metacyclophane-4-carbaldehyde (11e).** A solution of 5-methoxy[2.2]metacyclophane **9a** (23.8 mg, 0.10 mmol) in dry diethyl ether (1 mL) was treated with (-)-sparteine (46 μL, 0.20 mmol) and the mixture was stirred for 5 min. After cooling to -40°C, *s*BuLi (150 μL, 0.20 mmol) was added dropwise and the reaction mixture stirred at -40 °C for 4 h. The reaction mixture was cooled to -78 °C and DMF (24 μL, 0.30 mmol) added dropwise. The reaction mixture was stirred at room temperature for 2 h and the solvent was removed under reduced pressure. Ethyl acetate (10 mL) was added to the residue, washed with HCl (2 M, 2 x 10 mL), dried over sodium sulfate and concentrated to dryness. Purification by silica gel chromatography eluting with 70:30 pentane:diethyl ether gave **11e** as a colourless solid (*R<sub>f</sub>* = 0.80, 18 mg, 68%), mp 88-92 °C. <sup>1</sup>H NMR (400 MHz, CDCl<sub>3</sub>) δ 10.64 (s, 1H), 7.27 (t, *J* = 7.5 Hz, 1H), 7.06 (d, *J* = 7.5 Hz, 1H), 7.02 (d, *J* = 7.5 Hz, 1H), 6.69 (s, 1H), 4.45-4.35 (m, 2H), 3.99 (s, 1H), 3.93 (s, 3H), 3.20-3.03 (m, 3H), 2.22-2.02 (m, 4H), 1.69 (td, *J* = 11.7, 3.1 Hz, 1H). <sup>13</sup>C NMR (100 MHz, CDCl<sub>3</sub>) δ 192.0, 164.2, 146.8, 142.2, 139.4, 137.8, 135.3, 131.8, 129.0, 125.8, 125.1, 120.4, 108.4, 55.9, 41.6, 40.6, 40.2, 38.0. ESI-HRMS [M+H]<sup>+</sup>: 267.1379, C<sub>18</sub>H<sub>19</sub>O<sub>2</sub> requires 267.1385. [α]<sub>D</sub><sup>20</sup> = +97.2 (c 0.4, CHCl<sub>3</sub>, 82% ee). Enantiomeric excess was determined by analytical chiral HPLC (Chiralpak IA 250 x 4.6 mm ID, 254nm UV detector, room temperature, eluent: 1% ethanol in heptane, flow rate: 1.0 ml/min). Retention times: 8.6 min (minor isomer) and 10.3 min (major).

HPLC chart of *racemic* **11e**

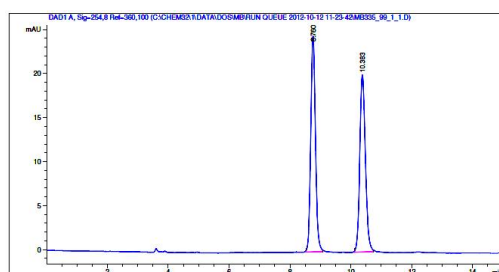

HPLC chart of **11e**

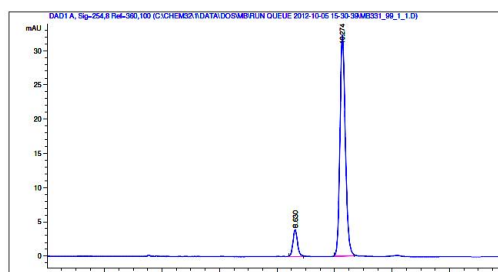

**(R<sub>p</sub>)-(-)-4-Iodo-5-methoxy[2.2]metacyclophane (11f).** A solution of 5-methoxy[2.2]metacyclophane **9a** (23.8 mg, 0.10 mmol) in dry diethyl ether (1 mL) was treated with (-)-sparteine (46 μL, 0.20 mmol) and the mixture was stirred for 5 min. After cooling to -40°C, *s*BuLi (150 μL, 0.20 mmol) was added dropwise and the reaction mixture stirred at -40 °C for 4 h. The reaction mixture was cooled to -78 °C and a solution of iodine (76 mg, 0.30 mmol) in diethyl ether (1 mL) added dropwise. The reaction mixture was stirred at room temperature for 2 h and the solvent was removed under reduced pressure. Ethyl acetate (10 mL) was added to the residue, washed with HCl (2 M, 2 x 10 mL), sodium thiosulfate (2 x 15 mL), dried over sodium sulfate and concentrated to dryness. Purification by silica gel chromatography eluting with 95:5 pentane:diethyl ether gave **11f** as a colourless solid (*R<sub>f</sub>* = 0.70, 22 mg, 59%), mp 56-60 °C. <sup>1</sup>H NMR (500 MHz, CDCl<sub>3</sub>) δ 7.27 (d, *J* = 7.4 Hz, 1H), 7.06 (d, *J* = 7.4, 1H), 7.03 (d, *J* = 7.4 Hz, 1H), 6.56 (d, *J* = 1.5 Hz, 1H), 4.38 (s, 1H), 4.06 (d, *J* = 1.5 Hz, 1H), 3.92 (s, 3H), 3.59 (dt, *J* = 12.4, 3.5 Hz, 1H), 3.10 (dt, *J* = 11.4, 3.3 Hz, 1H), 3.05 (dt, *J* = 11.9, 3.2 Hz, 1H), 3.00 (dt, *J* = 12.4, 3.5 Hz, 1H), 2.27 (td, *J* = 12.3, 3.3 Hz, 1H), 2.18-2.02 (m, 3H). <sup>13</sup>C NMR (100 MHz, CDCl<sub>3</sub>) δ 158.7, 142.8, 140.1, 138.7, 138.5, 135.9, 130.4, 128.9, 125.8, 125.3, 108.4, 87.3, 56.6, 45.8, 40.7, 40.7, 38.3. [*α*]<sub>D</sub><sup>20</sup> = -2.4 (c 0.4, CHCl<sub>3</sub>, 85% ee). Enantiomeric excess was determined by analytical chiral HPLC (Chiralpak IA 250 x 4.6 mm ID, 254nm UV detector, room temperature, eluent: 0.5% ethanol in heptane, flow rate: 0.8 ml/min). Retention times: 7.0 min (minor isomer) and 8.2 min (major isomer).

HPLC chart of *racemic* **11f**

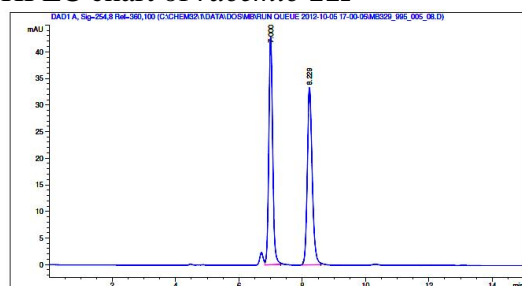

HPLC chart of **11f**

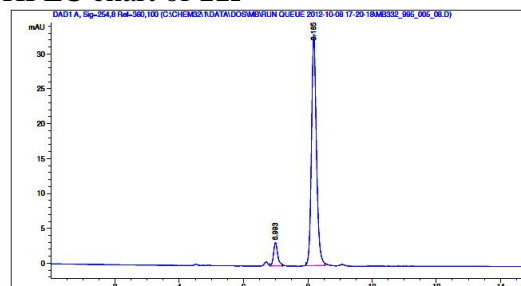

**(R<sub>p</sub>)-(-)-5-Methoxy[2.2]metacyclophane-4-phosphonic acid diethyl ester (11g).** A solution of 5-methoxy[2.2]metacyclophane **9a** (23.8 mg, 0.10 mmol) in dry diethyl ether (1 mL) was treated with (-)-sparteine (46 μL, 0.20 mmol) and the mixture was stirred for 5 min. After cooling to -40 °C, *s*BuLi (150 μL, 0.20 mmol) was added dropwise and the reaction mixture stirred at -40 °C for 4 h. The reaction mixture was cooled to -78 °C and diethyl chlorophosphate (43 μL, 0.30 mmol) added dropwise. The reaction mixture was stirred at room temperature for 4 h and the solvent was removed under reduced pressure. Ethyl acetate (10 mL) was added to the residue, washed with HCl (2 M, 2 x 10 mL), dried over sodium sulfate and concentrated to dryness. Purification by silica gel chromatography eluting with ethyl acetate gave **11g** as a colourless solid (*R<sub>f</sub>* = 0.50, 22 mg, 58%), mp 113-116 °C. <sup>1</sup>H NMR (500 MHz, CD<sub>3</sub>OD) δ 7.18 (t, *J* = 7.5 Hz, 1H), 6.96 (d, *J* = 7.5 Hz, 2H), 6.79 (dd, *J* = 5.6, 0.7 Hz, 1H), 4.30 (s, 1H), 4.27-4.22 (m, 1H), 4.12-3.97 (m, 4H), 3.95 (d, *J* = 4.2 Hz, 1H), 3.81 (s, 3H), 3.08-3.02 (m, 3H), 2.99 (dt, *J* = 12.5, 3.6 Hz, 1H), 2.17-2.05 (m, 2H), 1.97-1.89 (m, 1H), 1.67 (td, *J* = 12.2, 2.9 Hz, 1H), 1.28-1.21 (m, 6H). <sup>13</sup>C NMR (100 MHz, CD<sub>3</sub>OD) δ 163.6 (d, *J* = 3.1 Hz), 145.7 (d, *J* = 2.6 Hz), 145.0 (d, *J* = 9.7 Hz), 139.0, 138.1, 134.9, 131.5 (d, *J* = 16.2 Hz), 128.8, 125.2, 124.9, 110.9, 108.9 (d, *J* = 9.8 Hz), 61.9 (d, *J* = 6.0 Hz), 61.8 (d, *J* = 5.9 Hz), 55.3, 40.7 (d, *J* = 0.8 Hz), 40.4 (d, *J* = 1.1 Hz), 40.1 (d, *J* = 0.9 Hz), 39.7 (d, *J* = 2.5 Hz), 15.3 (d, *J* = 6.8 Hz), 15.2 (d, *J* = 6.7 Hz). <sup>31</sup>P NMR (162 MHz, CD<sub>3</sub>OD) δ 19.6 (s). ESI-HRMS [M+Na]<sup>+</sup>: 397.1557, C<sub>21</sub>H<sub>27</sub>O<sub>4</sub>PNa requires 397.1545. [α]<sub>D</sub><sup>20</sup> = -3.9 (c 0.4, CHCl<sub>3</sub>, 86% ee). Enantiomeric excess was determined by analytical chiral HPLC (Chiralpak IA 250 x 4.6 mm ID, 254nm UV detector, room temperature, eluent: 5% ethanol in heptane, flow rate: 1.0 ml/min). Retention times: 9.9 min (minor isomer) and 11.2 min (major isomer).



HPLC chart of *racemic 11g*

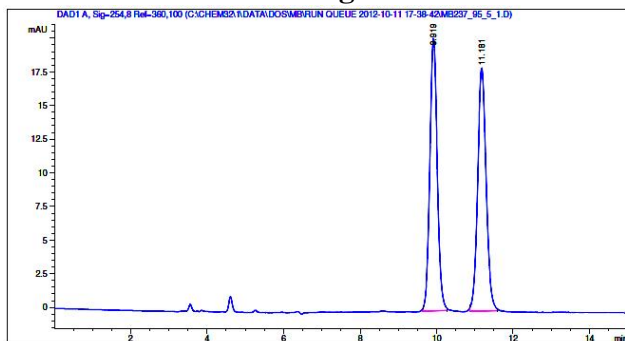

Area Percent Report

Sorted By : Signal  
 Multiplier : 1.0000  
 Dilution : 1.0000  
 Use Multiplier & Dilution Factor with ISTDs

Signal 1: DAD1 A, Sig=254,8 Ref=360,100

| Peak # | RetTime [min] | Type | Width [min] | Area [mAU*s] | Height [mAU] | Area %  |
|--------|---------------|------|-------------|--------------|--------------|---------|
| 1      | 9.919         | BB   | 0.2070      | 272.82547    | 20.26728     | 49.5678 |
| 2      | 11.181        | BB   | 0.2353      | 277.58316    | 18.06306     | 50.4322 |

HPLC chart of **11g**

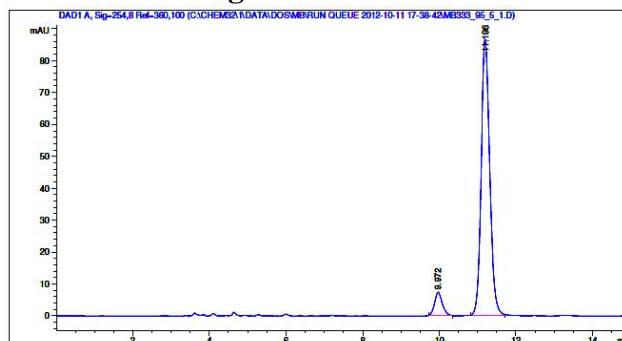

Area Percent Report

Sorted By : Signal  
 Multiplier : 1.0000  
 Dilution : 1.0000  
 Use Multiplier & Dilution Factor with ISTDs

Signal 1: DAD1 A, Sig=254,8 Ref=360,100

| Peak # | RetTime [min] | Type | Width [min] | Area [mAU*s] | Height [mAU] | Area %  |
|--------|---------------|------|-------------|--------------|--------------|---------|
| 1      | 9.972         | BB   | 0.2153      | 106.18696    | 7.40441      | 7.3450  |
| 2      | 11.196        | BB   | 0.2384      | 1339.52466   | 86.62981     | 92.6550 |

**(*R<sub>p</sub>*)-(-)-Diphenyl(5-methoxy[2.2]metacyclophan-4-yl)phosphine oxide (11h)**. A solution of 5-methoxy[2.2]metacyclophane **9a** (23.8 mg, 0.10 mmol) in dry diethyl ether (1 mL) was treated with (-)-sparteine (46  $\mu$ L, 0.20 mmol) and the mixture was stirred for 5 min. After cooling to  $-40^{\circ}\text{C}$ , *s*BuLi (150  $\mu$ L, 0.20 mmol) was added dropwise and the reaction mixture stirred at  $-40^{\circ}\text{C}$  for 4 h. The reaction mixture was cooled to  $-78^{\circ}\text{C}$  and chlorodiphenylphosphine (55  $\mu$ L, 0.30 mmol) added dropwise. The reaction mixture was stirred at room temperature for 4 h and the solvent was removed under reduced pressure. Ethyl acetate (10 mL) was added to the residue, washed with HCl (2 M, 2 x 10 mL), dried over sodium sulfate and concentrated to dryness. Purification by short-pad silica gel chromatography eluting with DCM gave **11h** as a colourless solid ( $R_f = 0.40$ , 30 mg, 69%), mp 196-198  $^{\circ}\text{C}$ .  $^1\text{H}$  NMR (500 MHz,  $\text{CDCl}_3$ )  $\delta$  7.80 (dd,  $J = 8.1, 1.4$  Hz, 1H), 7.78 (dd,  $J = 8.1, 1.4$  Hz, 1H), 7.67 (dd,  $J = 8.2, 1.2$  Hz, 1H), 7.65 (dd,  $J = 8.2, 1.3$  Hz, 1H), 7.53-7.42 (m, 4H), 7.42-7.36 (m, 2H), 7.28 (t,  $J = 7.5$  Hz, 1H), 7.08-7.02 (m, 2H), 6.60-6.57 (m, 1H), 4.92 (dt,  $J = 12.1, 3.3$  Hz, 1H), 4.47 (s, 1H), 4.13 (d,  $J = 1.7$  Hz, 1H), 3.24 (s, 3H), 3.15 (dt,  $J = 12.1, 3.5$  Hz, 1H), 3.08 (dq,  $J = 11.4, 3.8$  Hz, 2H), 2.25-2.15 (m, 2H), 2.08 (td,  $J = 12.0, 3.7$  Hz, 1H), 1.80 (td,  $J = 12.1, 3.3$  Hz, 1H).  $^{13}\text{C}$  NMR (100 MHz,  $\text{CDCl}_3$ )  $\delta$  161.8 (d,  $J = 4.7$  Hz), 147.8 (d,  $J = 6.1$  Hz), 144.9

(d,  $J = 2.1$  Hz), 139.7, 137.9, 136.9, 135.9, 135.8, 135.2, 134.8, 133.1 (d,  $J = 11.2$  Hz), 131.4 (d,  $J = 10.2$  Hz), 131.1 (d,  $J = 10.3$  Hz), 131.0 (d,  $J = 2.8$  Hz), 130.7 (d,  $J = 2.9$  Hz), 129.0, 128.1 (d,  $J = 12.5$  Hz), 127.9 (d,  $J = 12.5$  Hz), 125.7, 125.0, 115.2, 114.1, 109.1 (d,  $J = 6.6$  Hz), 55.1, 41.1, 41.0, 40.6, 39.0.  $^{31}\text{P}$  NMR (162 MHz,  $\text{CDCl}_3$ )  $\delta$  31.0 (s). ESI-HRMS  $[\text{M}+\text{H}]^+$ : 439.1815,  $\text{C}_{29}\text{H}_{28}\text{O}_2\text{P}$  requires 439.1827.  $[\alpha]_{\text{D}}^{20} = -14.2$  (c 0.6,  $\text{CHCl}_3$ , 89% ee). Enantiomeric excess was determined by analytical chiral HPLC (Chiralpak IA 250 x 4.6 mm ID, 254nm UV detector, room temperature, eluent: 20% ethanol in heptane, flow rate: 0.8 ml/min). Retention times: 7.8 min (minor isomer) and 8.9 min (major isomer).

HPLC chart of *racemic 11h*\*

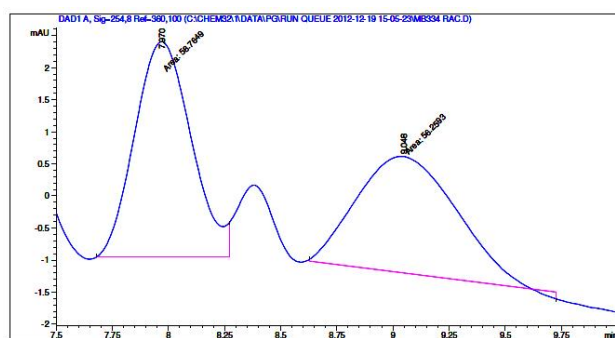

Area Percent Report

Sorted By : Signal  
 Multiplier : 1.0000  
 Dilution : 1.0000  
 Use Multiplier & Dilution Factor with ISTDs

Signal 1: DAD1 A, Sig-254,8 Ref-360,100

| Peak # | RetTime [min] | Type | Width [min] | Area [mAU*s] | Height [mAU] | Area %  |
|--------|---------------|------|-------------|--------------|--------------|---------|
| 1      | 7.970         | MM   | 0.2918      | 58.76494     | 3.35668      | 51.0892 |
| 2      | 9.048         | MM   | 0.5155      | 56.25933     | 1.81906      | 48.9108 |

HPLC chart of **11h**

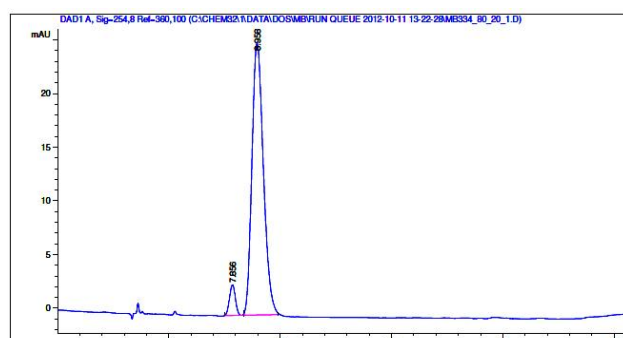

Area Percent Report

Sorted By : Signal  
 Multiplier : 1.0000  
 Dilution : 1.0000  
 Use Multiplier & Dilution Factor with ISTDs

Signal 1: DAD1 A, Sig-254,8 Ref-360,100

| Peak # | RetTime [min] | Type | Width [min] | Area [mAU*s] | Height [mAU] | Area %  |
|--------|---------------|------|-------------|--------------|--------------|---------|
| 1      | 7.856         | BB   | 0.2910      | 52.73690     | 2.86195      | 5.4968  |
| 2      | 8.958         | BB   | 0.5512      | 906.68085    | 25.35197     | 94.5032 |

\* obtained by racemization of **11h** in NMP (453 K)

**( $R_p$ )-(+)-*N,N*-Diisopropyl-4-formyl-[2.2]metacylophane-5-carboxamide (11i)**. A solution of *N,N*-diisopropyl[2.2]metacylophane-5-carboxamide **9b** (33.5 mg, 0.10 mmol) in dry diethyl ether (1 mL) was treated with (-)-sparteine (46  $\mu\text{L}$ , 0.20 mmol) and the mixture was stirred for 5 min. After cooling to  $-78$   $^\circ\text{C}$ , *s*BuLi (150  $\mu\text{L}$ , 0.20 mmol) was added dropwise and the reaction mixture stirred at  $-78$   $^\circ\text{C}$  for 4 h. DMF (24  $\mu\text{L}$ , 0.30 mmol) was added dropwise, the reaction mixture was stirred at room temperature for 2 h and the solvent was removed under reduced pressure. Ethyl acetate (10

mL) was added to the residue, washed with HCl (2 M, 2 x 10 mL), dried over sodium sulfate and concentrated to dryness. Purification by silica gel chromatography eluting with 3:2 pentane:ethyl acetate gave **11i** as a colourless solid ( $R_f = 0.60$ , 19 mg, 59%), mp 101-103 °C.  $^1\text{H}$  NMR (400 MHz,  $\text{CDCl}_3$ )  $\delta$  10.32 (s, 1H), 7.31 (t,  $J = 7.5$  Hz, 1H), 7.12-7.00 (m, 3H), 4.42-4.26 (m, 3H), 3.57-3.45 (m, 2H), 3.24-3.10 (m, 3H), 2.21-2.06 (m, 3H), 1.85 (td,  $J = 12.0, 3.0$  Hz, 1H), 1.60 (dd,  $J = 6.8, 2.8$  Hz, 6H), 1.08 (d,  $J = 5.8$  Hz, 6H).  $^{13}\text{C}$  NMR (100 MHz,  $\text{CDCl}_3$ )  $\delta$  191.0, 169.4, 138.7, 138.6, 137.8, 136.0, 129.5, 127.5, 125.8, 125.4, 123.5, 51.2, 46.0, 41.1, 40.3, 37.6, 20.6, 20.5, 20.4, 20.2. ESI-HRMS  $[\text{M}+\text{H}]^+$ : 364.2284,  $\text{C}_{24}\text{H}_{30}\text{NO}_2$  requires 364.2277.  $[\alpha]_D^{20} = +30.3$  (c 0.4,  $\text{CHCl}_3$ , 68% ee). Enantiomeric excess was determined by analytical chiral HPLC (Chiralpak IA 250 x 4.6 mm ID, 254nm UV detector, room temperature, eluent: 2% ethanol in heptane, flow rate: 1.0 ml/min). Retention times: 26.5 min (major isomer) and 33.3 min (minor isomer).

HPLC chart of *racemic 11i*\*

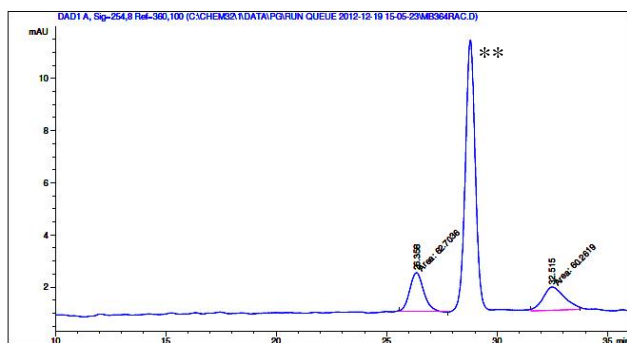

Area Percent Report

Sorted By : Signal  
 Multiplier : 1.0000  
 Dilution : 1.0000  
 Use Multiplier & Dilution Factor with ISTDs

Signal 1: DAD1 A, Sig=254,8 Ref=360,100

| Peak # | RetTime [min] | Type | Width [min] | Area [mAU*s] | Height [mAU] | Area %  |
|--------|---------------|------|-------------|--------------|--------------|---------|
| 1      | 26.358        | MM   | 0.7165      | 62.70362     | 1.45848      | 50.9928 |
| 2      | 32.515        | MM   | 1.1295      | 60.26192     | 8.89231e-1   | 49.0072 |

Totals : 122.96554 2.34771

HPLC chart of **11i**

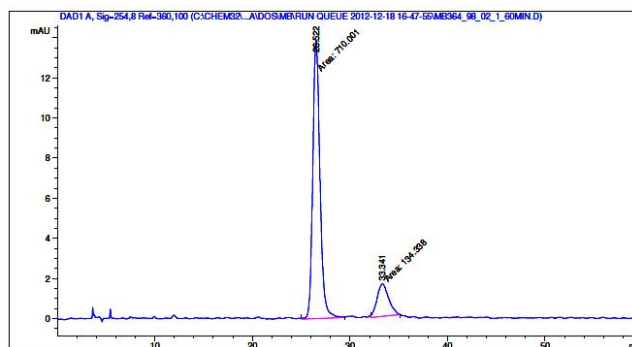

Area Percent Report

Sorted By : Signal  
 Multiplier : 1.0000  
 Dilution : 1.0000  
 Use Multiplier & Dilution Factor with ISTDs

Signal 1: DAD1 A, Sig=254,8 Ref=360,100

| Peak # | RetTime [min] | Type | Width [min] | Area [mAU*s] | Height [mAU] | Area %  |
|--------|---------------|------|-------------|--------------|--------------|---------|
| 1      | 26.522        | MM   | 0.8531      | 710.00061    | 13.87142     | 84.0895 |
| 2      | 33.341        | MM   | 1.3806      | 134.33829    | 1.62175      | 15.9105 |

\* obtained by racemization of **11i** in NMP (453 K)

\*\* by-product due to decomposition of starting material at 453K

**(*R<sub>p</sub>*)-(-)-5,13-Dimethoxy[2.2]metacyclophane-4-phosphonic acid diethyl ester (11j).** A solution of 5,13-dimethoxy[2.2]metacyclophane **9c** (26.8 mg, 0.10 mmol) in dry diethyl ether (4 mL) was treated with (-)-sparteine (46  $\mu$ L, 0.20 mmol) and the mixture was stirred for 5 min. After cooling to -40 °C, *s*BuLi (150  $\mu$ L, 0.20 mmol) was added dropwise and the reaction mixture stirred at -40 °C for 4 h. The reaction mixture was cooled to -78 °C and diethyl chlorophosphate (43  $\mu$ L, 0.30 mmol) added dropwise. The reaction mixture was stirred at room temperature for 4 h and the solvent was removed under reduced pressure. Ethyl acetate (10 mL) was added to the residue, washed with HCl (2 M, 2 x 10 mL), dried over sodium sulfate and concentrated to dryness. Purification by silica gel chromatography eluting with ethyl acetate gave **11j** as a colourless solid ( $R_f$  = 0.40, 16 mg, 40%), mp 130-132 °C. <sup>1</sup>H NMR (400 MHz, CDCl<sub>3</sub>)  $\delta$  6.66 (d,  $J$  = 5.3 Hz, 1H), 6.61 (d,  $J$  = 11.1 Hz, 2H), 4.48 (dt,  $J$  = 11.8, 3.3 Hz, 1H), 4.25-4.02 (m, 6H), 3.88 (s, 3H), 3.82 (s, 3H), 3.10-3.00 (m, 3H), 2.26 (td,  $J$  = 12.3, 3.1 Hz, 1H), 2.20-2.04 (m, 2H), 1.83 (dd,  $J$  = 12.0, 9.2 Hz, 1H), 1.38-1.27 (m, 6H). <sup>13</sup>C NMR (100 MHz, CDCl<sub>3</sub>)  $\delta$  163.0 (d,  $J$  = 2.9 Hz), 160.8, 145.8 (d,  $J$  = 9.9 Hz), 144.7 (d,  $J$  = 2.6 Hz), 141.1, 139.5, 131.6 (d,  $J$  = 16.0 Hz), 128.8, 110.7, 108.9 (d,  $J$  = 9.7 Hz), 61.68-61.51 (m), 56.4, 55.3, 41.1 (d,  $J$  = 0.6 Hz), 41.0 (d,  $J$  = 0.8 Hz), 40.6, 40.1 (d,  $J$  = 2.5 Hz), 16.5 (d,  $J$  = 6.6 Hz), 16.3 (d,  $J$  = 6.8 Hz). <sup>31</sup>P NMR (162 MHz, CDCl<sub>3</sub>)  $\delta$  18.7 (s). ESI-HRMS [M+Na]<sup>+</sup>: 427.1663, C<sub>22</sub>H<sub>29</sub>O<sub>5</sub>NaP requires 427.1650.  $[\alpha]_D^{20}$  = -6.2 (c 0.3, CHCl<sub>3</sub>, 79% ee). Enantiomeric excess was determined by analytical chiral HPLC (Chiralpak IA 250 x 4.6 mm ID, 254nm UV detector, room temperature, eluent: 5% ethanol in heptane, flow rate: 1.0 ml/min). Retention times: 11.8 min (major isomer) and 12.7 min (minor isomer).

HPLC chart of *racemic 11j*

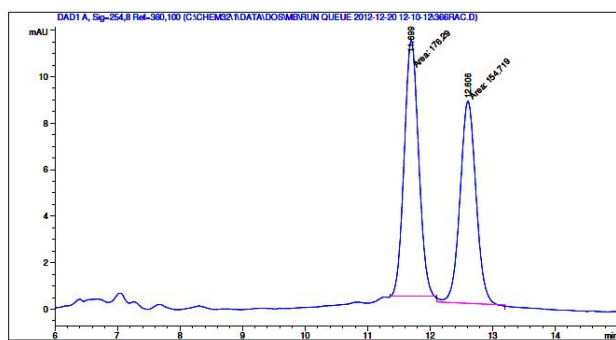

Area Percent Report

Sorted By : Signal  
 Multiplier : 1.0000  
 Dilution : 1.0000  
 Use Multiplier & Dilution Factor with ISTDs

Signal 1: DAD1 A, Sig-254,8 Ref-360,100

| Peak # | RetTime [min] | Type | Width [min] | Area [mAU*s] | Height [mAU] | Area %  |
|--------|---------------|------|-------------|--------------|--------------|---------|
| 1      | 11.699        | MM   | 0.2669      | 176.28999    | 11.00942     | 53.2583 |
| 2      | 12.606        | MM   | 0.2962      | 154.71931    | 8.70587      | 46.7417 |

HPLC chart of **11j**

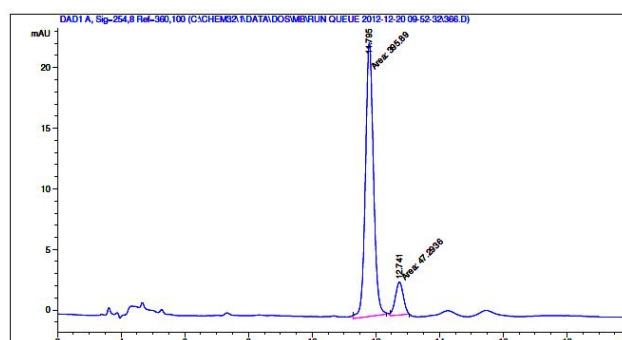

Area Percent Report

Sorted By : Signal  
 Multiplier : 1.0000  
 Dilution : 1.0000  
 Use Multiplier & Dilution Factor with ISTDs

Signal 1: DAD1 A, Sig-254,8 Ref-360,100

| Peak # | RetTime [min] | Type | Width [min] | Area [mAU*s] | Height [mAU] | Area %  |
|--------|---------------|------|-------------|--------------|--------------|---------|
| 1      | 11.795        | MM   | 0.2916      | 395.89020    | 22.62751     | 89.3287 |
| 2      | 12.741        | MM   | 0.2905      | 47.29364     | 2.71353      | 10.6713 |

**(*R<sub>p</sub>*)-(+)-5,13-Dimethoxy[2.2]metacyclophane-4-carbaldehyde (11k).** A solution of 5,13-dimethoxy[2.2]metacyclophane **9c** (26.8 mg, 0.10 mmol) in dry diethyl ether (4 mL) was treated with (-)-sparteine (46  $\mu$ L, 0.20 mmol) and the mixture was stirred for 5 min. After cooling to  $-40^{\circ}\text{C}$ , *s*BuLi (150  $\mu$ L, 0.20 mmol) was added dropwise and the reaction mixture stirred at  $-40^{\circ}\text{C}$  for 4 h. The reaction mixture was cooled to  $-78^{\circ}\text{C}$  and DMF (24  $\mu$ L, 0.30 mmol) added dropwise. The reaction mixture was stirred at room temperature for 2 h and the solvent was removed under reduced pressure. Ethyl acetate (10 mL) was added to the residue, washed with HCl (2 M, 2 x 10 mL), dried over sodium sulfate and concentrated to dryness. Purification by silica gel chromatography eluting with 80:20 pentane:ethyl acetate gave **11k** as a colourless solid ( $R_f = 0.70$ , 17 mg, 58%), mp  $80\text{--}82^{\circ}\text{C}$ .  $^1\text{H}$  NMR (400 MHz,  $\text{CDCl}_3$ )  $\delta$  10.62 (s, 1H), 6.67 (s, 1H), 6.63 (s, 1H), 6.60 (s, 1H), 4.38 (dt,  $J = 11.5, 3.5$  Hz, 1H), 4.09 (s, 1H), 4.07 (s, 1H), 3.92 (s, 3H), 3.82 (s, 3H), 3.12–3.00 (m, 3H), 2.20–2.07 (m, 3H), 1.74 (td,  $J = 11.8, 3.2$  Hz, 1H).  $^{13}\text{C}$  NMR (100 MHz,  $\text{CDCl}_3$ )  $\delta$  192.0, 164.1, 160.8, 146.9, 142.3, 140.9, 139.3, 131.5, 128.6, 120.4, 110.9, 110.8, 108.4, 55.9, 55.3, 41.5, 40.8, 40.4, 37.9. ESI-HRMS  $[\text{M}+\text{Na}]^+$ : 319.1301,  $\text{C}_{19}\text{H}_{20}\text{O}_3\text{Na}$  requires 319.1310.

$[\alpha]_D^{20} = +69.7$  (c 0.3,  $\text{CHCl}_3$ , 82% ee). Enantiomeric excess was determined by analytical chiral HPLC (Chiralpak IA 250 x 4.6 mm ID, 254nm UV detector, room temperature, eluent: 1% ethanol in heptane, flow rate: 1.0 ml/min). Retention times: 12.7 min (minor isomer) and 14.4 min (major isomer).

HPLC chart of *racemic* **11k**

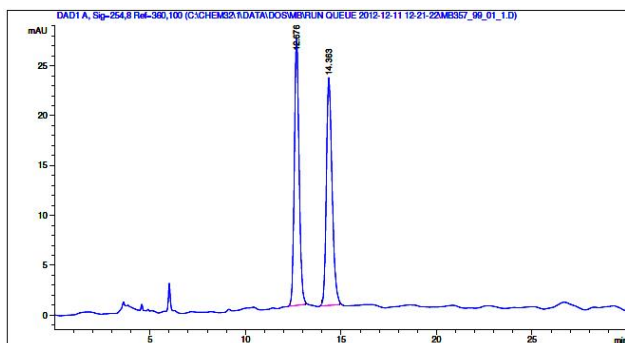

Area Percent Report

Sorted By : Signal  
 Multiplier : 1.0000  
 Dilution : 1.0000  
 Use Multiplier & Dilution Factor with ISTDs

Signal 1: DAD1 A, Sig-254,8 Ref-360,100

| Peak # | RetTime [min] | Type | Width [min] | Area [mAU*s] | Height [mAU] | Area %  |
|--------|---------------|------|-------------|--------------|--------------|---------|
| 1      | 12.676        | BB   | 0.2636      | 461.48309    | 26.70400     | 49.2204 |
| 2      | 14.363        | BB   | 0.3192      | 476.10104    | 22.84047     | 50.7796 |

HPLC chart of **11k**

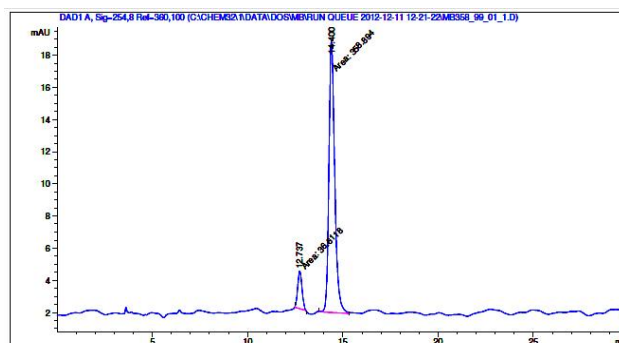

Area Percent Report

Sorted By : Signal  
 Multiplier : 1.0000  
 Dilution : 1.0000  
 Use Multiplier & Dilution Factor with ISTDs

Signal 1: DAD1 A, Sig-254,8 Ref-360,100

| Peak # | RetTime [min] | Type | Width [min] | Area [mAU*s] | Height [mAU] | Area %  |
|--------|---------------|------|-------------|--------------|--------------|---------|
| 1      | 12.737        | MM   | 0.2597      | 36.61177     | 2.34934      | 9.2570  |
| 2      | 14.400        | MM   | 0.3544      | 358.89392    | 16.87868     | 90.7430 |

### *N,N*-Diisopropyl-3,5-dimethylbenzamide

$^1\text{H}$  NMR (500 MHz,  $\text{CDCl}_3$ )

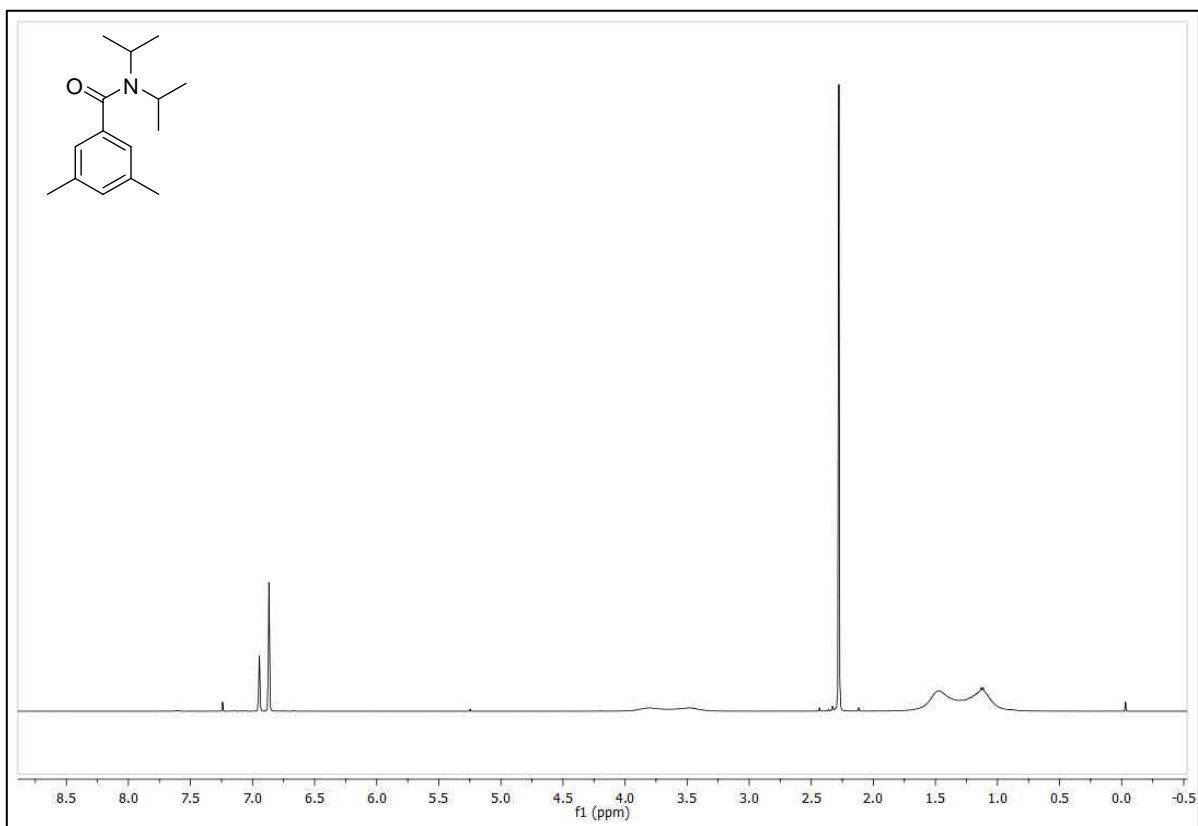

$^{13}\text{C}$  NMR (100 MHz,  $\text{CDCl}_3$ )

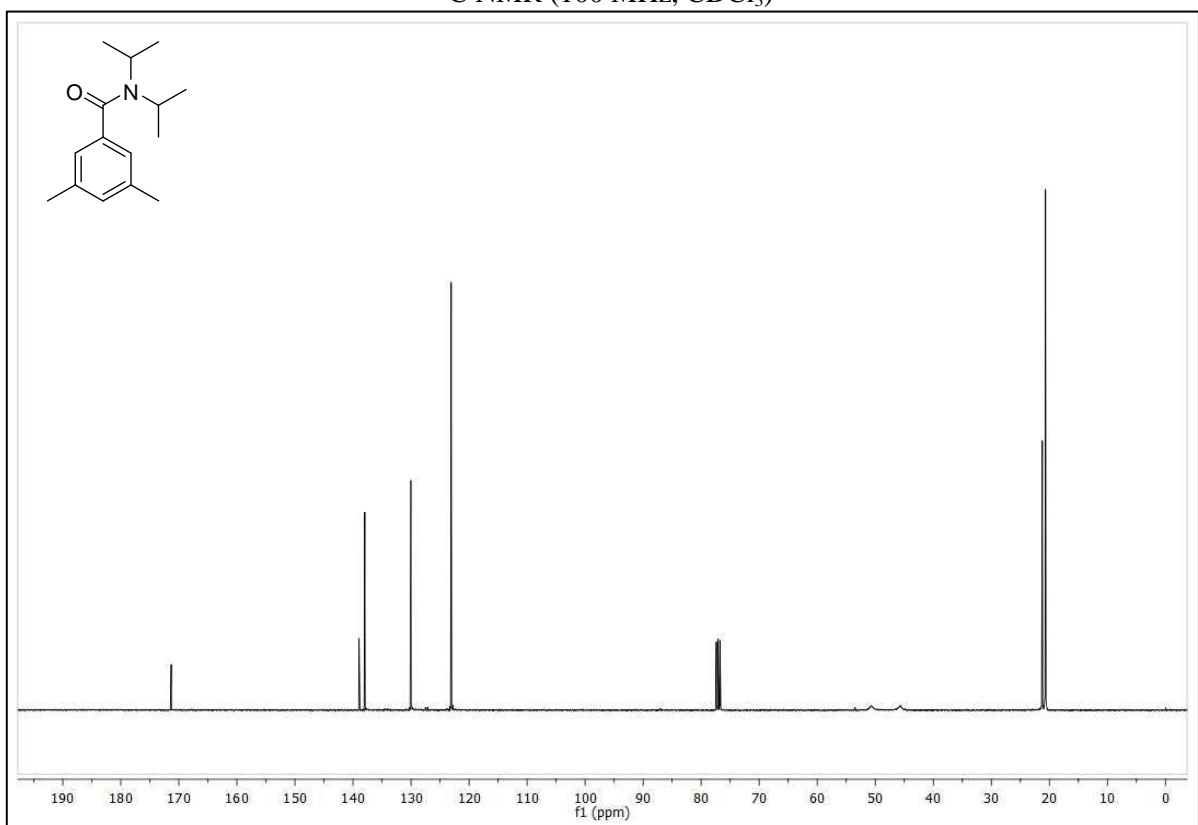

**1-Methoxy-3-methyl-5-(3-methylphenethyl)benzene (8a)**

$^1\text{H}$  NMR (500 MHz,  $\text{CDCl}_3$ )

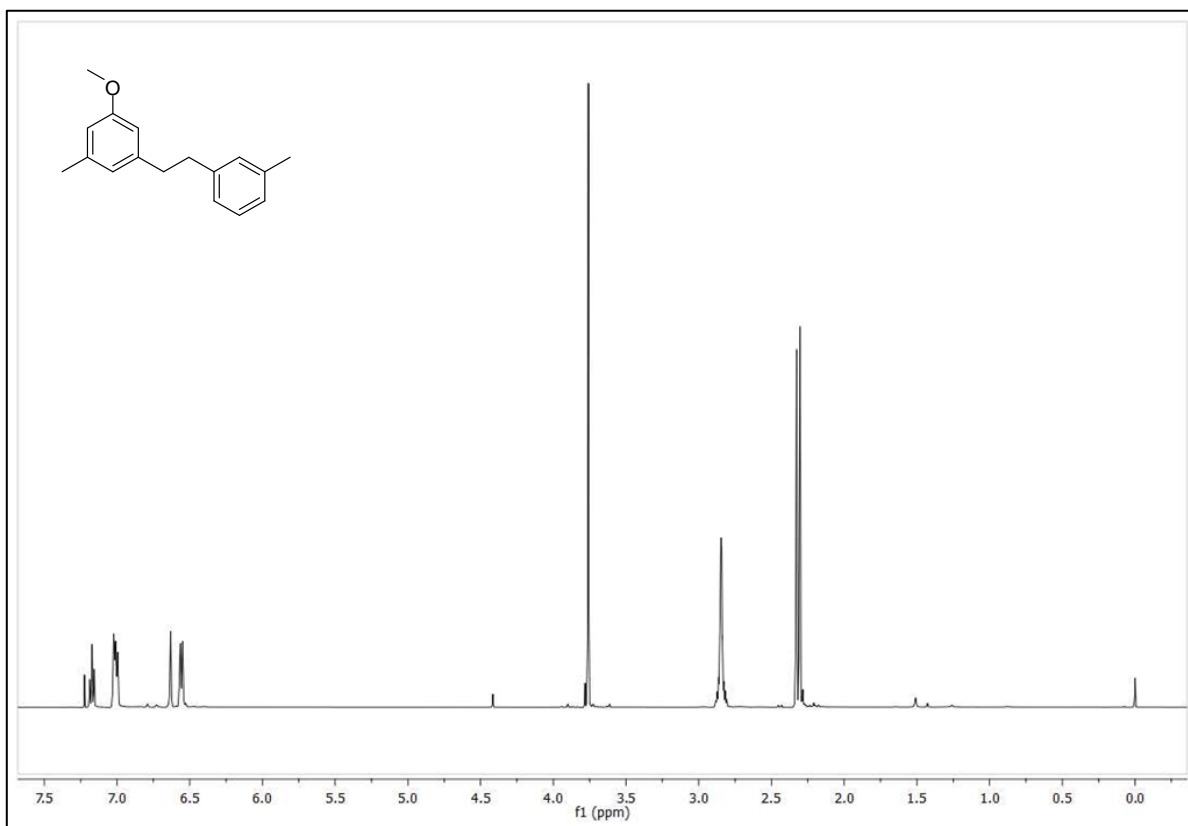

$^{13}\text{C}$  NMR (125 MHz,  $\text{CDCl}_3$ )

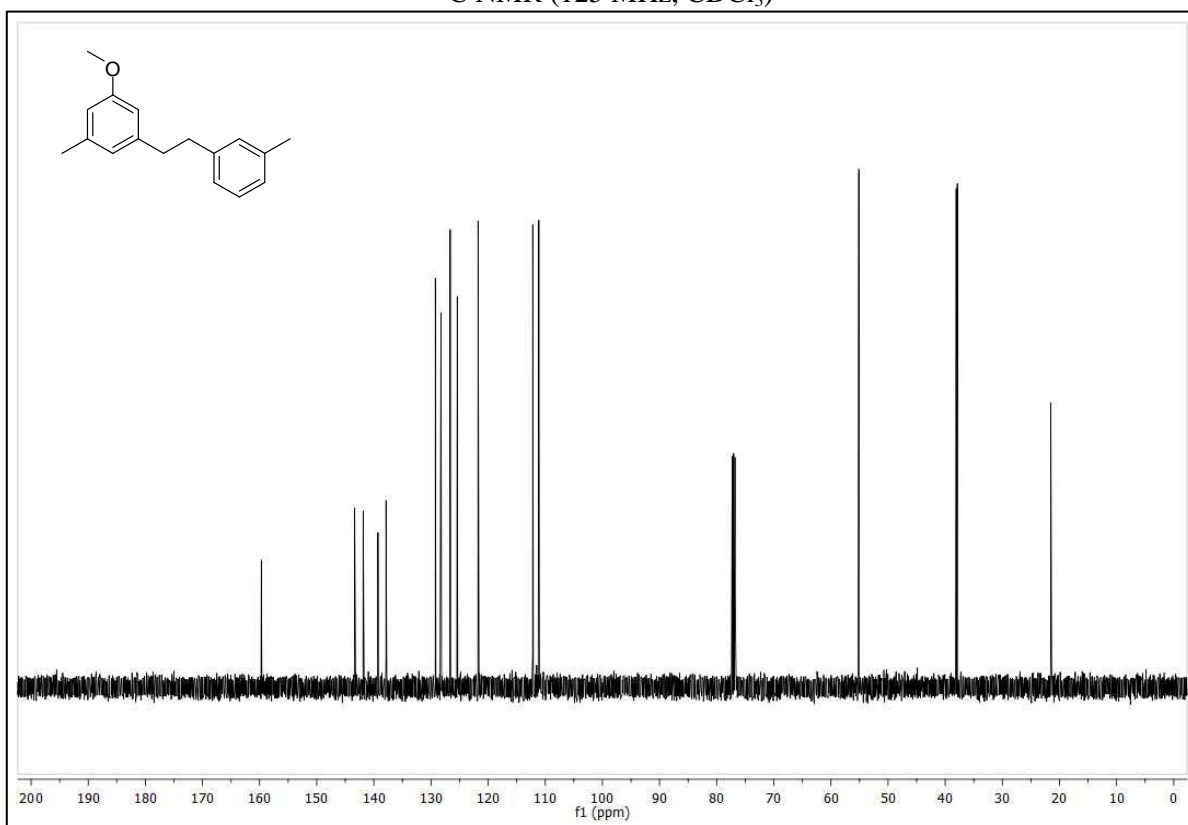



***N,N*-Diisopropyl-3-methyl-5-(3-methylphenethyl)benzamide (8b)**

$^1\text{H}$  NMR (400 MHz,  $\text{CDCl}_3$ )

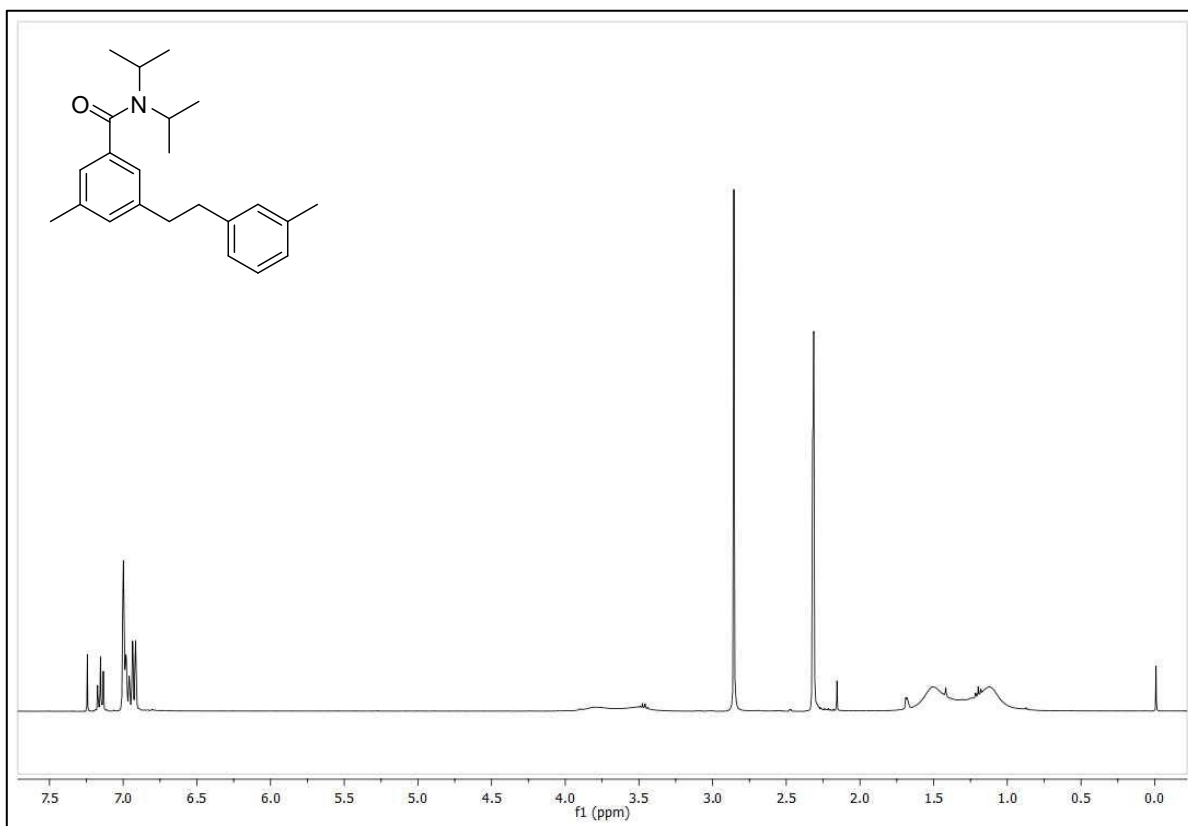

$^{13}\text{C}$  NMR (100 MHz,  $\text{CDCl}_3$ )

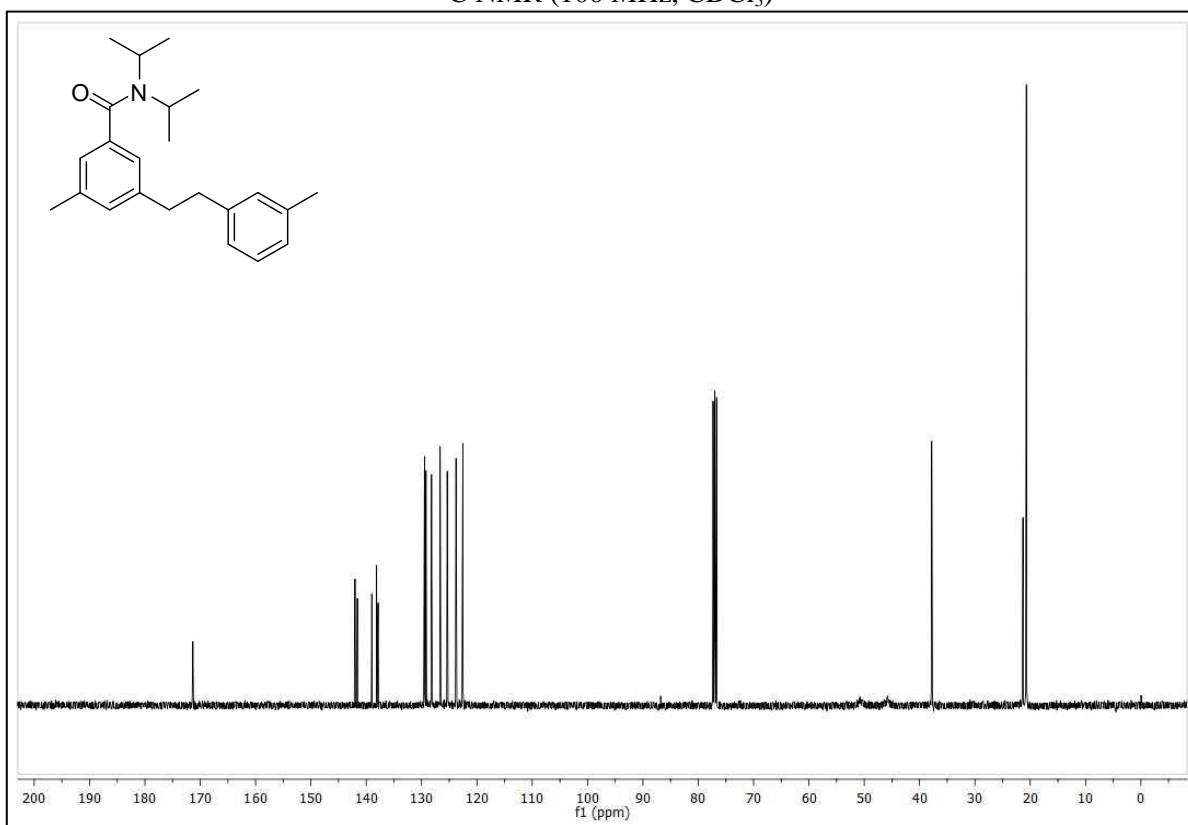

### 1,2-Bis(3-methoxy-5-methylphenyl)ethane (8c)

$^1\text{H}$  NMR (500 MHz,  $\text{CDCl}_3$ )

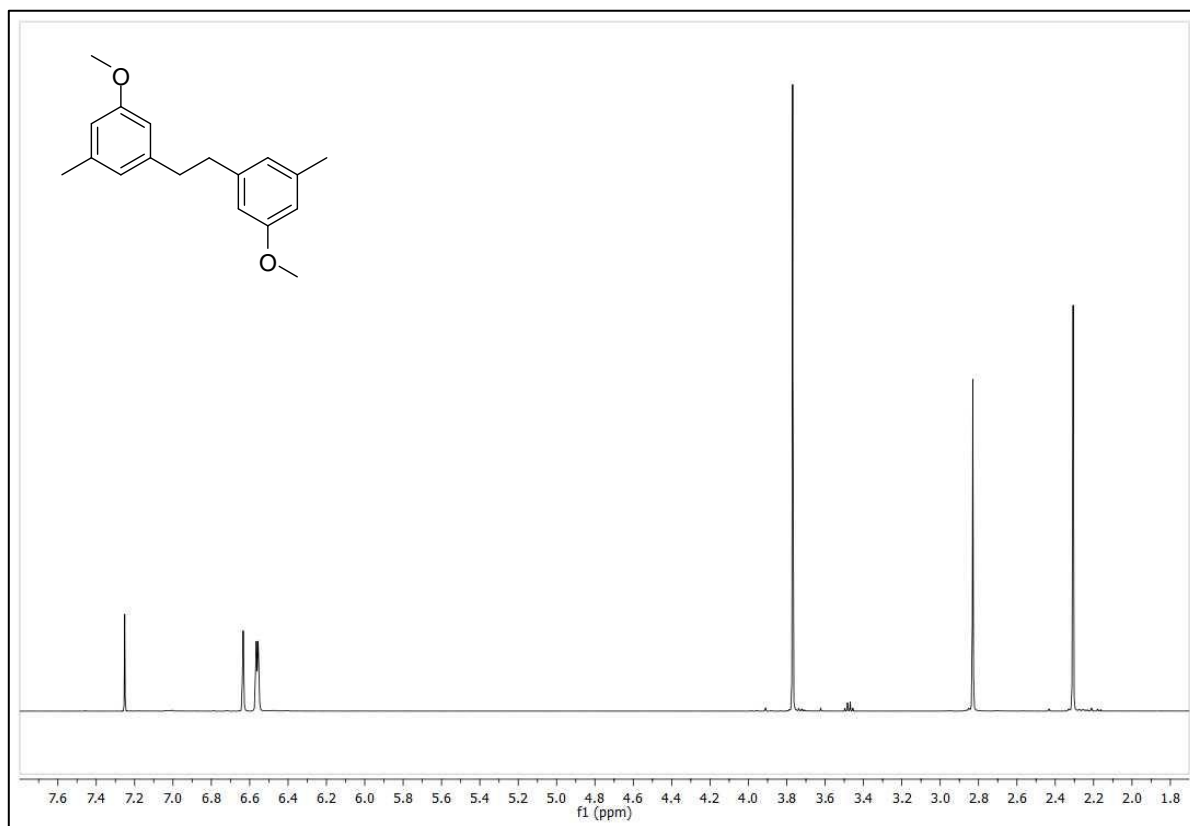

$^{13}\text{C}$  NMR (125 MHz,  $\text{CDCl}_3$ )

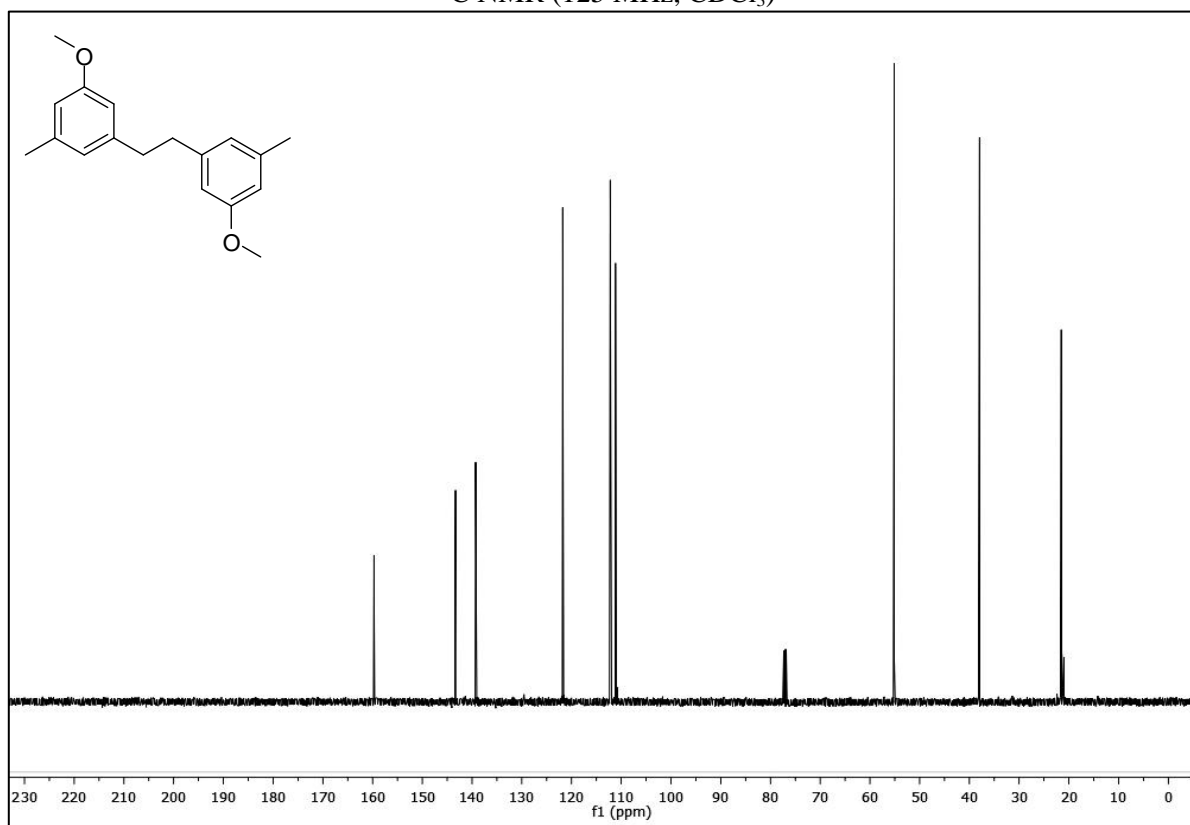

### 5-Methoxy[2.2]metacyclophane (9a)

$^1\text{H}$  NMR (500 MHz,  $\text{CDCl}_3$ )

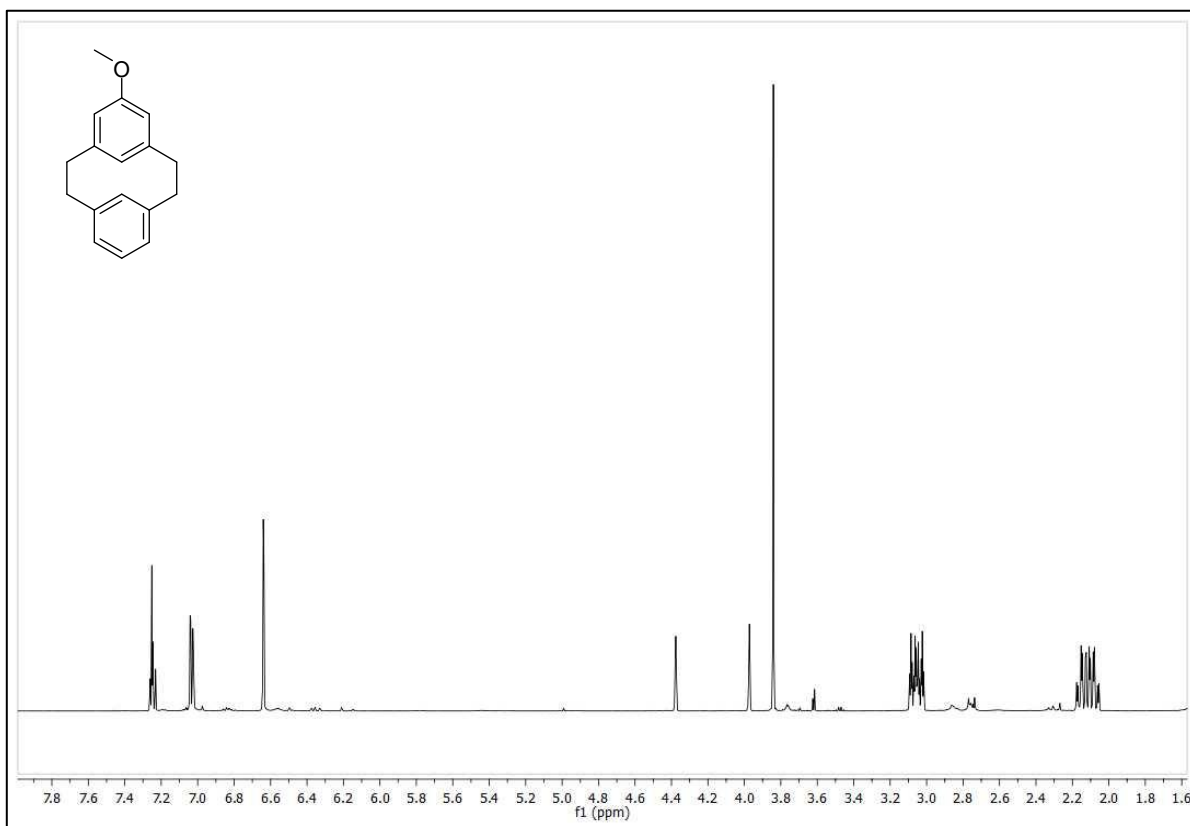

$^{13}\text{C}$  NMR (125 MHz,  $\text{CDCl}_3$ )

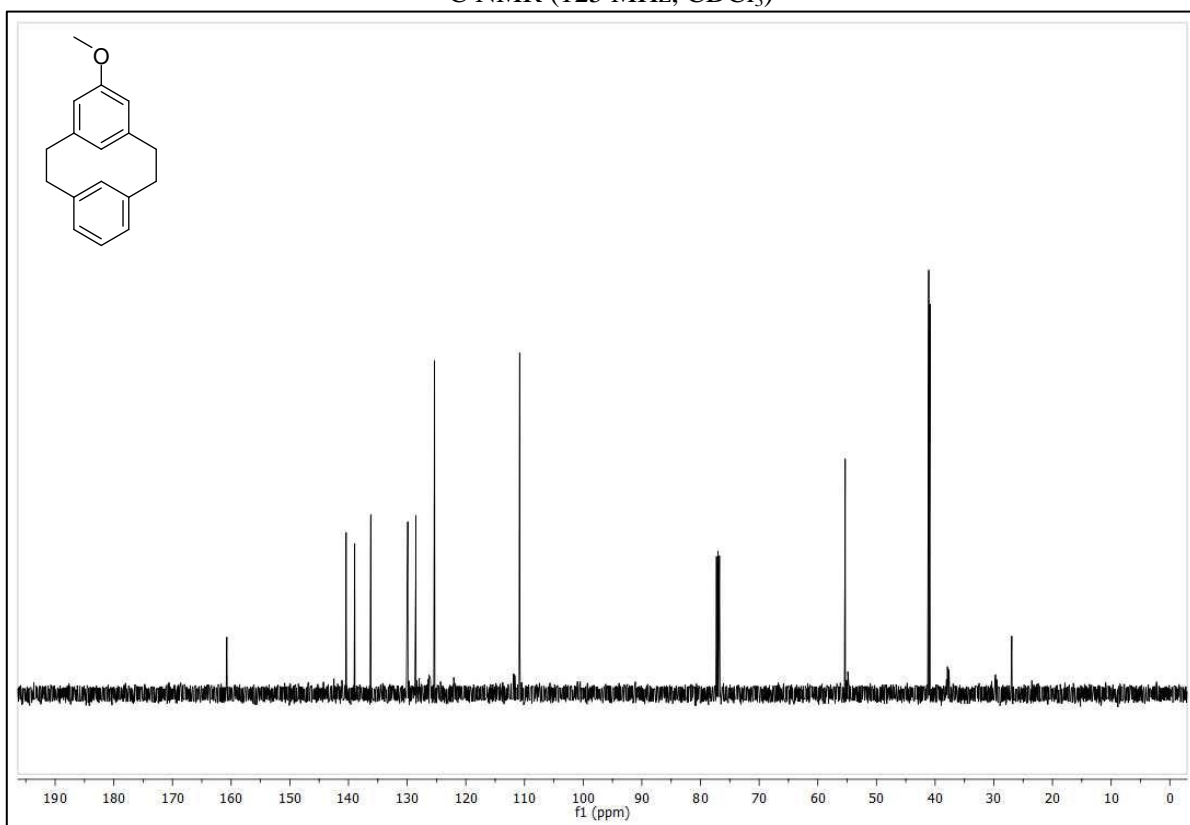

***N,N*-Diisopropyl[2.2]metacyclophane-5-carboxamide (9b)**

$^1\text{H}$  NMR (400 MHz,  $\text{CDCl}_3$ )

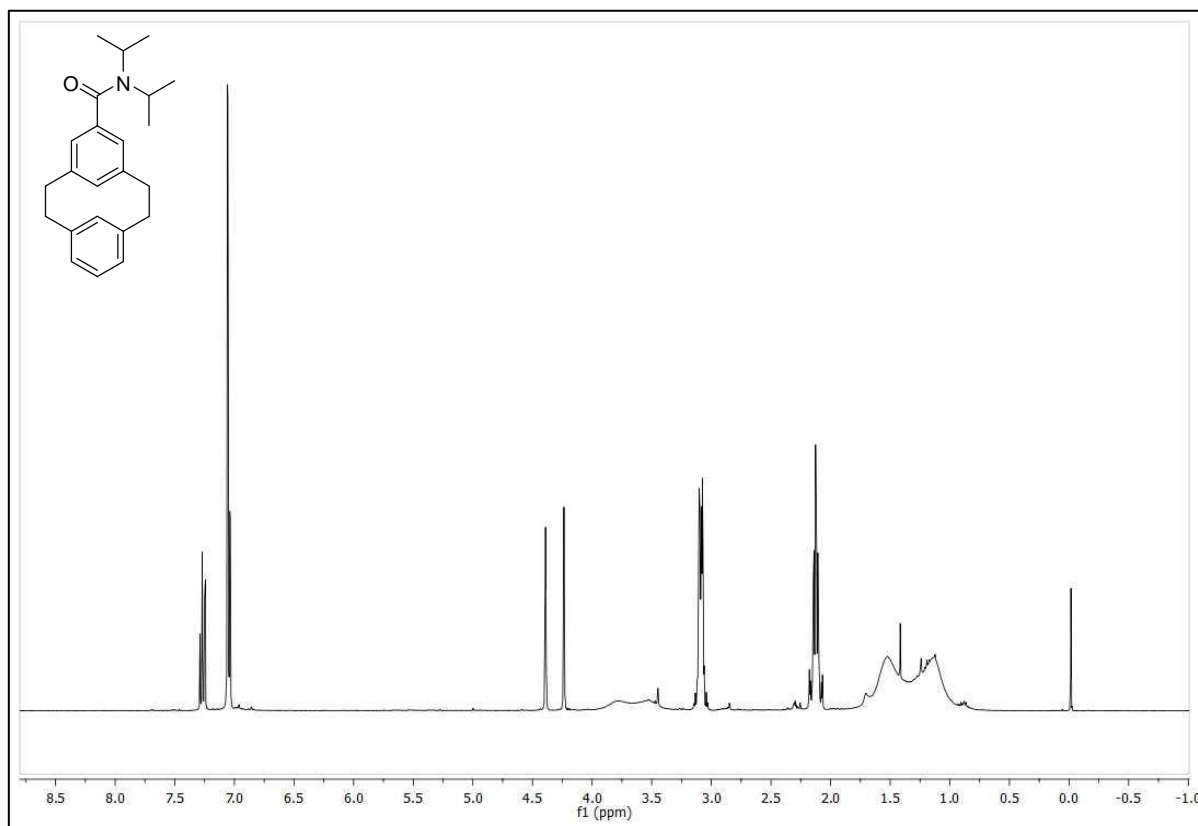

$^{13}\text{C}$  NMR (100 MHz,  $\text{CDCl}_3$ )

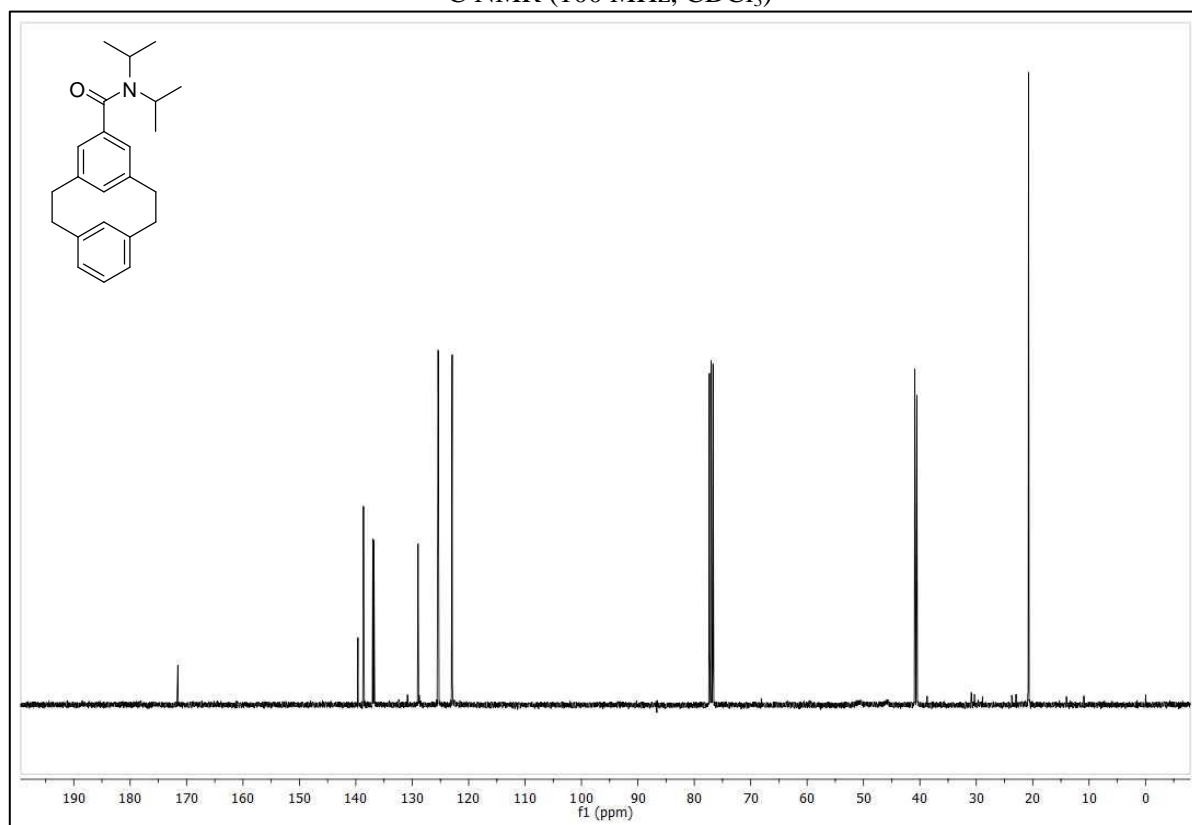

### 5,13-Dimethoxy[2.2]metacyclophane (9c)

$^1\text{H}$  NMR (500 MHz,  $\text{CDCl}_3$ )

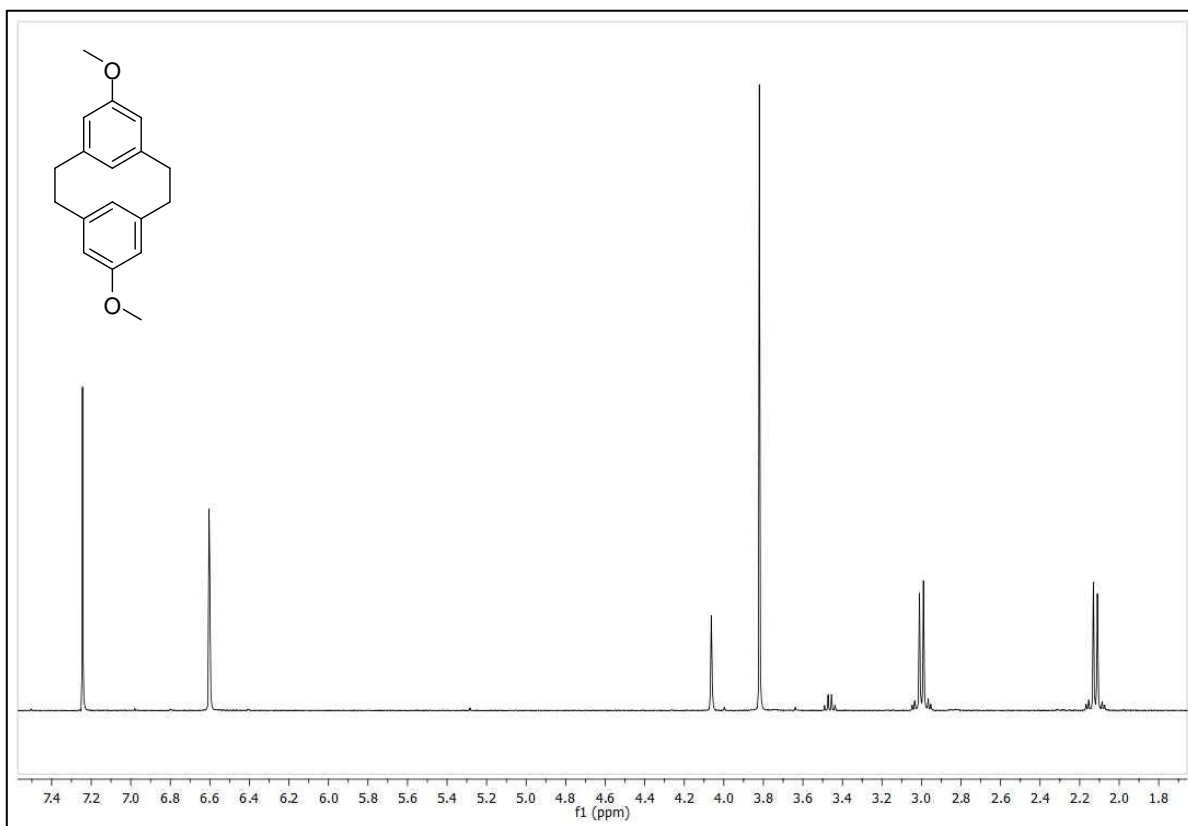

$^{13}\text{C}$  NMR (125 MHz,  $\text{CDCl}_3$ )

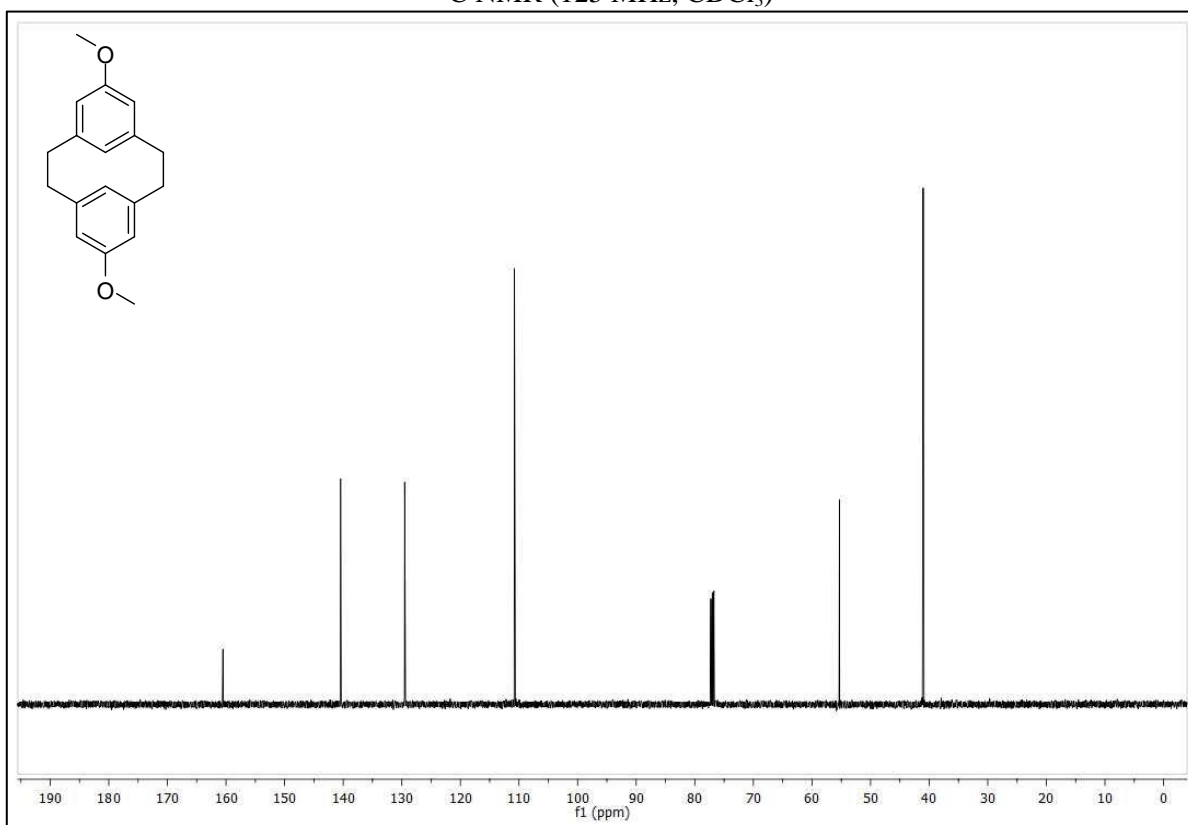

**(*R<sub>p</sub>*)-(-)-5-Methoxy[2.2]metacyclophane-4-carboxylic acid ethyl ester (11a)**

<sup>1</sup>H NMR (500 MHz, CDCl<sub>3</sub>)

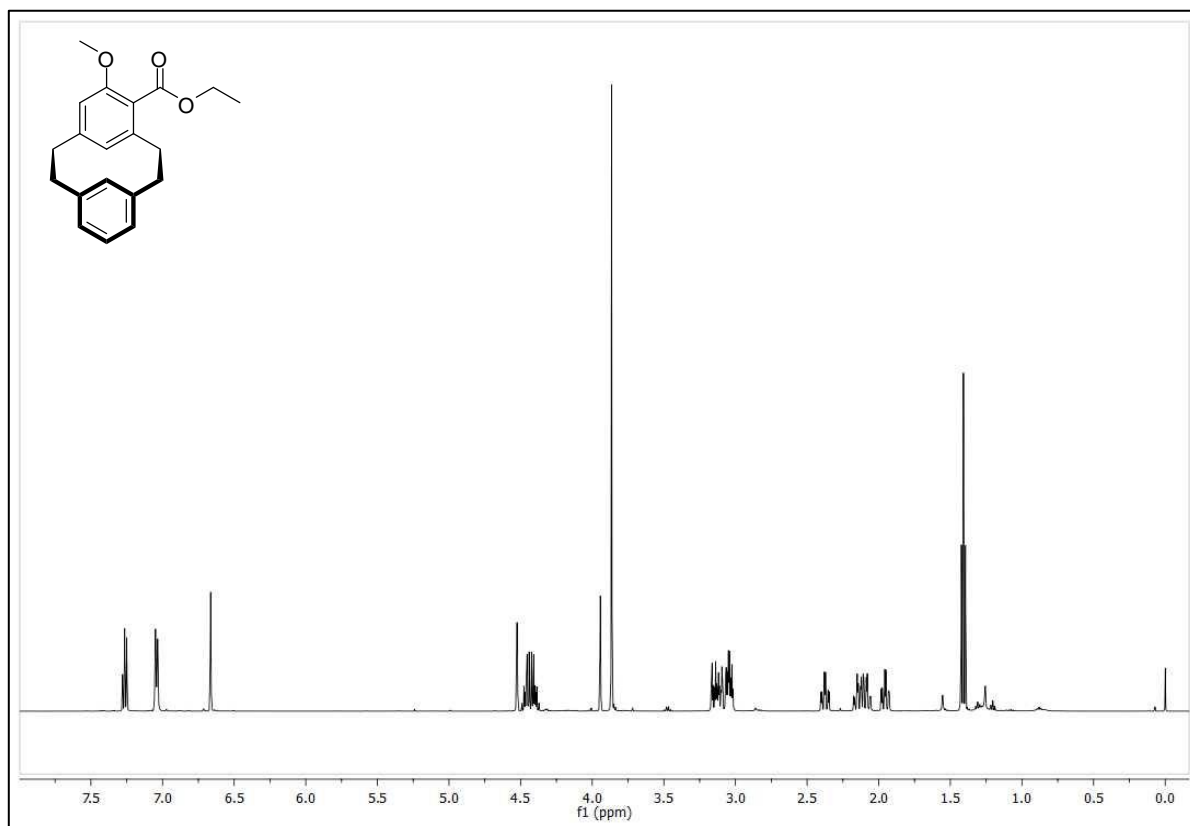

<sup>13</sup>C NMR (125 MHz, CDCl<sub>3</sub>)

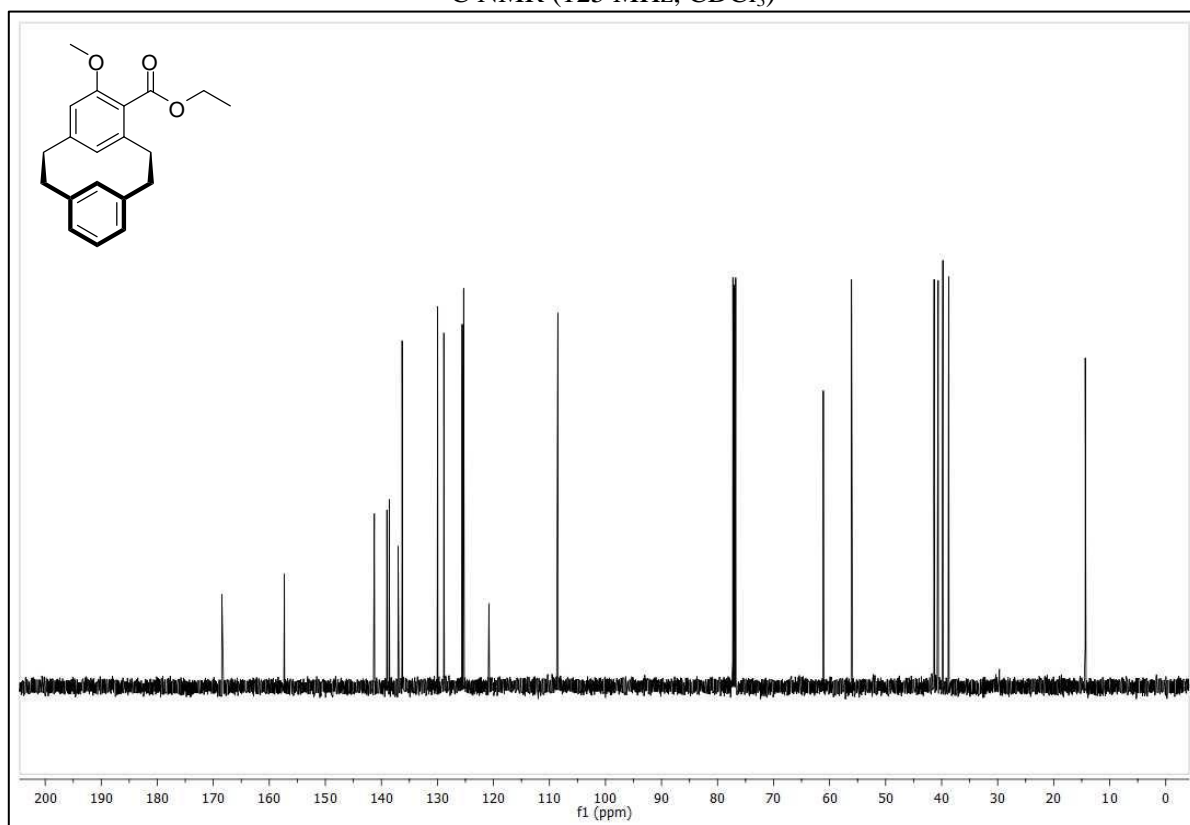

**(*R<sub>p</sub>*)-(-)-5-(*N,N*-diisopropylcarbamoyl)[2.2]metacyclophane-4-carboxylic acid ethyl ester (11b)**

<sup>1</sup>H NMR (500 MHz, CDCl<sub>3</sub>)

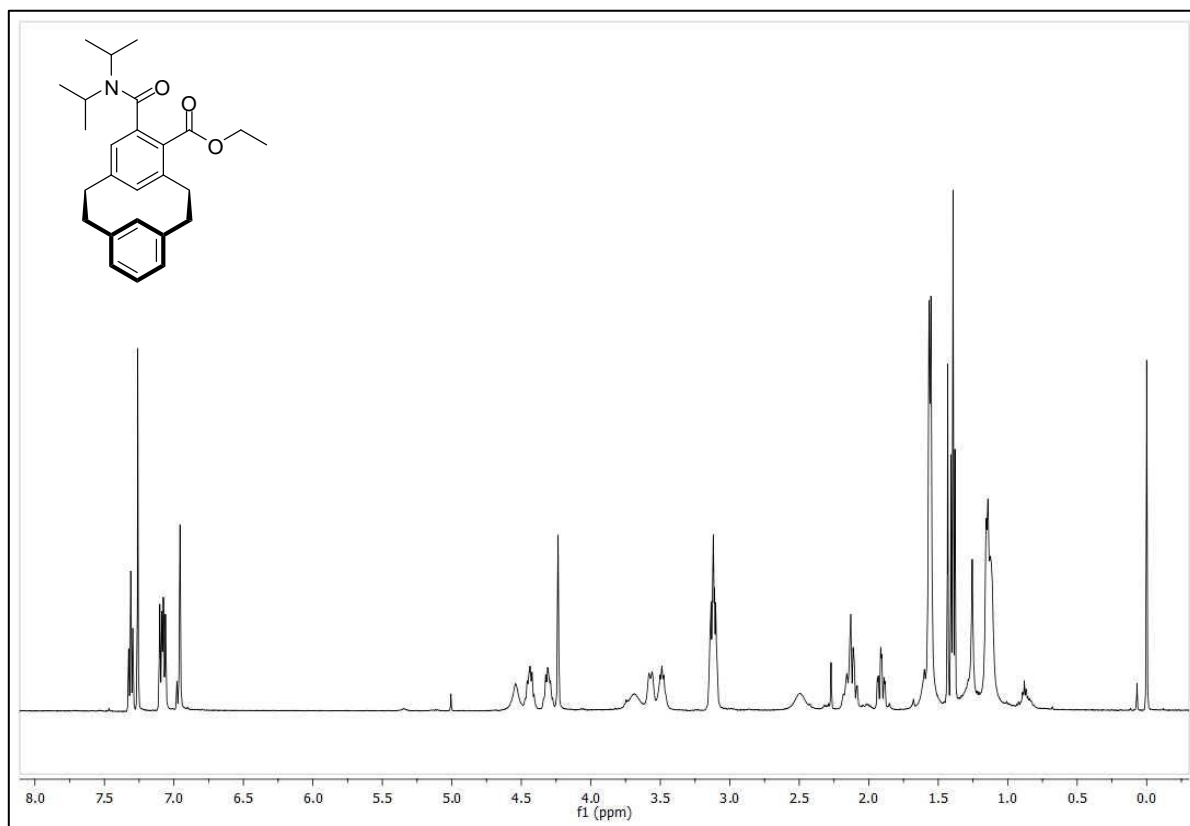

<sup>13</sup>C NMR (100 MHz, CDCl<sub>3</sub>)

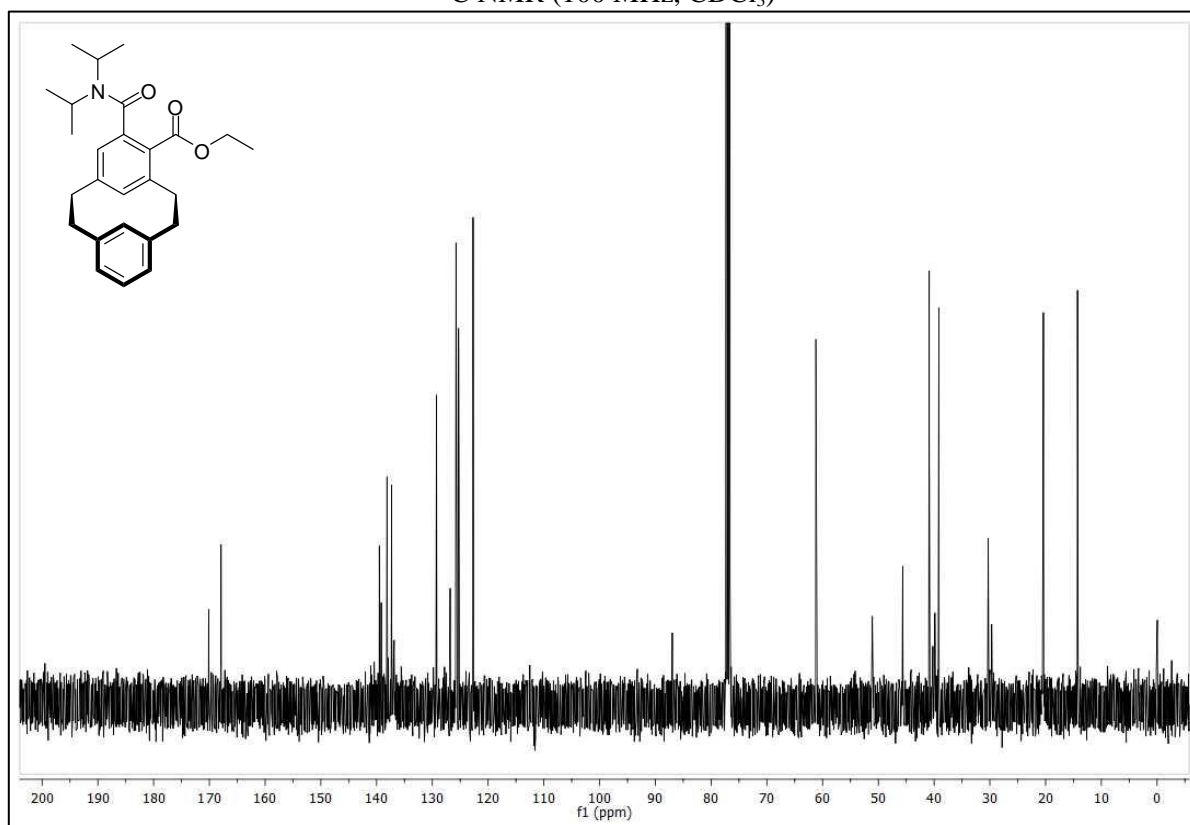

**(*R<sub>p</sub>*)-(-)-5,13-Dimethoxy[2.2]metacyclophane-4-carboxylic acid ethyl ester (11c)**

<sup>1</sup>H NMR (500 MHz, CDCl<sub>3</sub>)

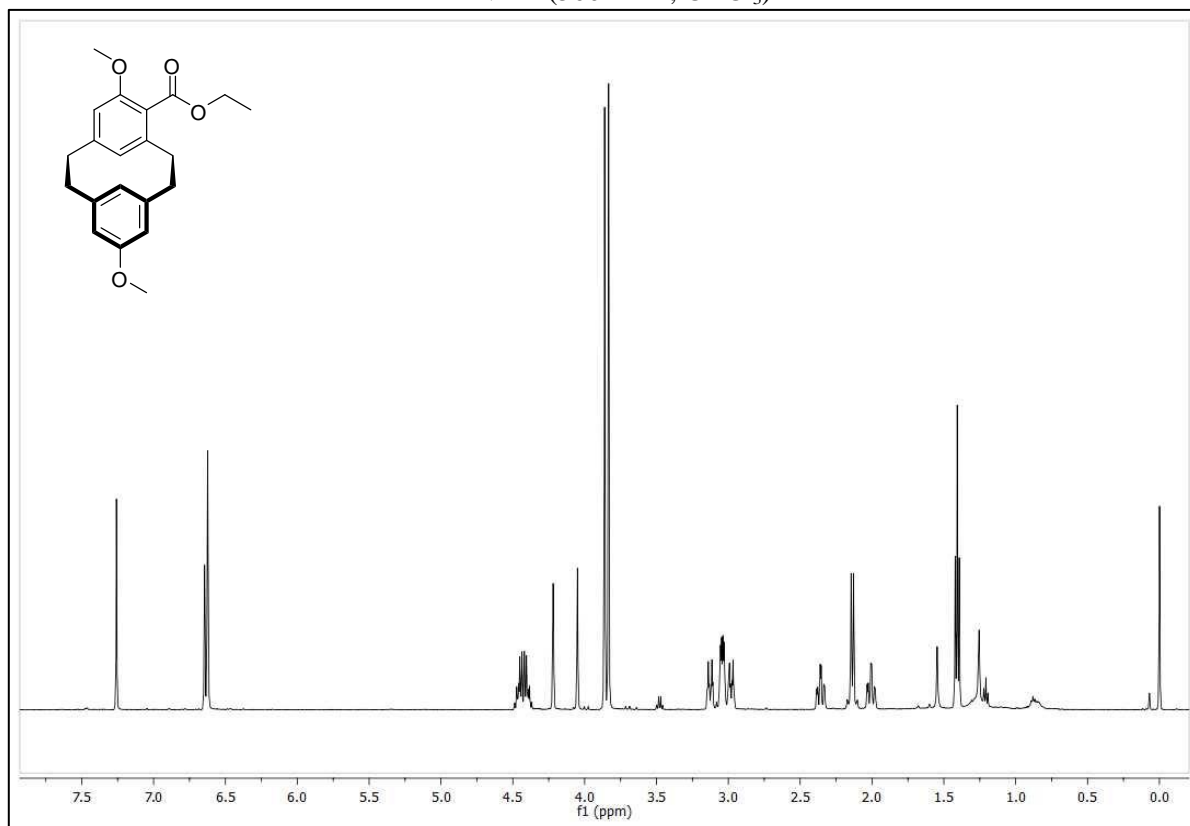

<sup>13</sup>C NMR (100 MHz, CDCl<sub>3</sub>)

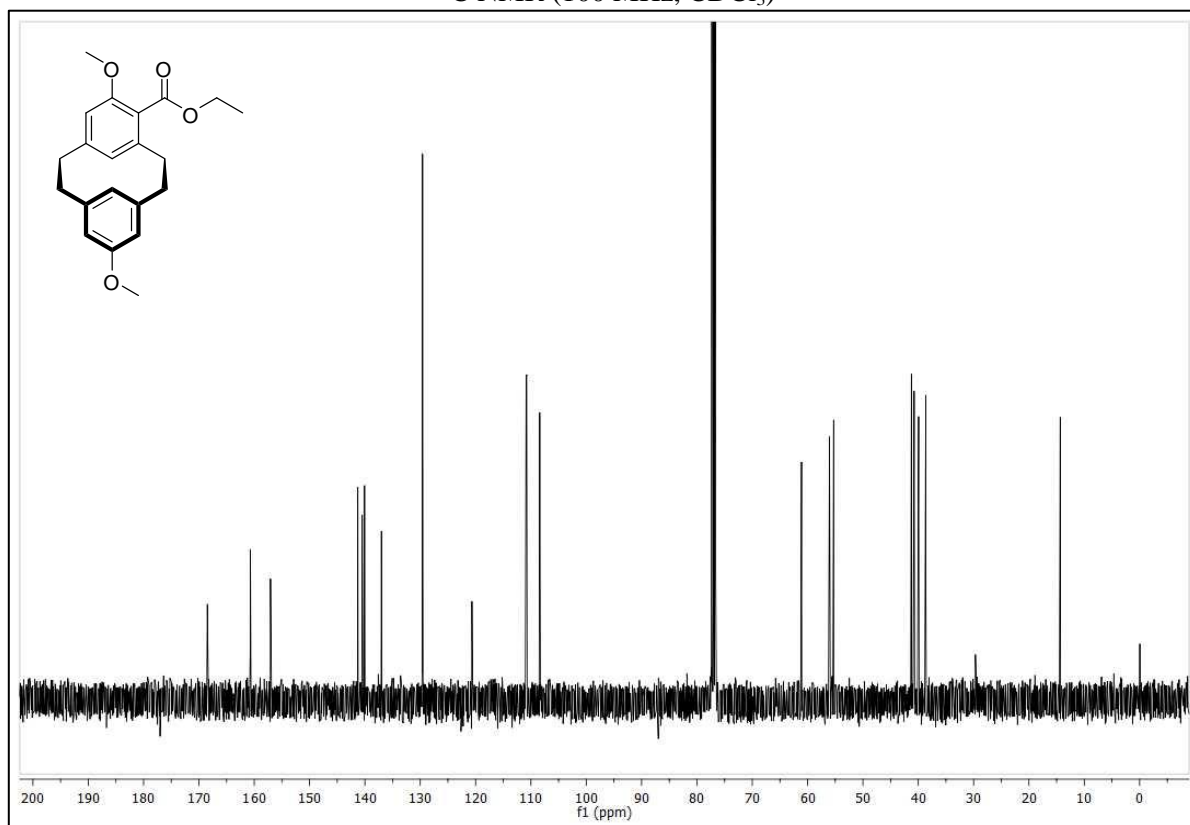



**(*R<sub>p</sub>*)-(-)-5-Methoxy[2.2]metacyclophane-4-carboxylic acid (11d)**

<sup>1</sup>H NMR (500 MHz, CD<sub>3</sub>OD)

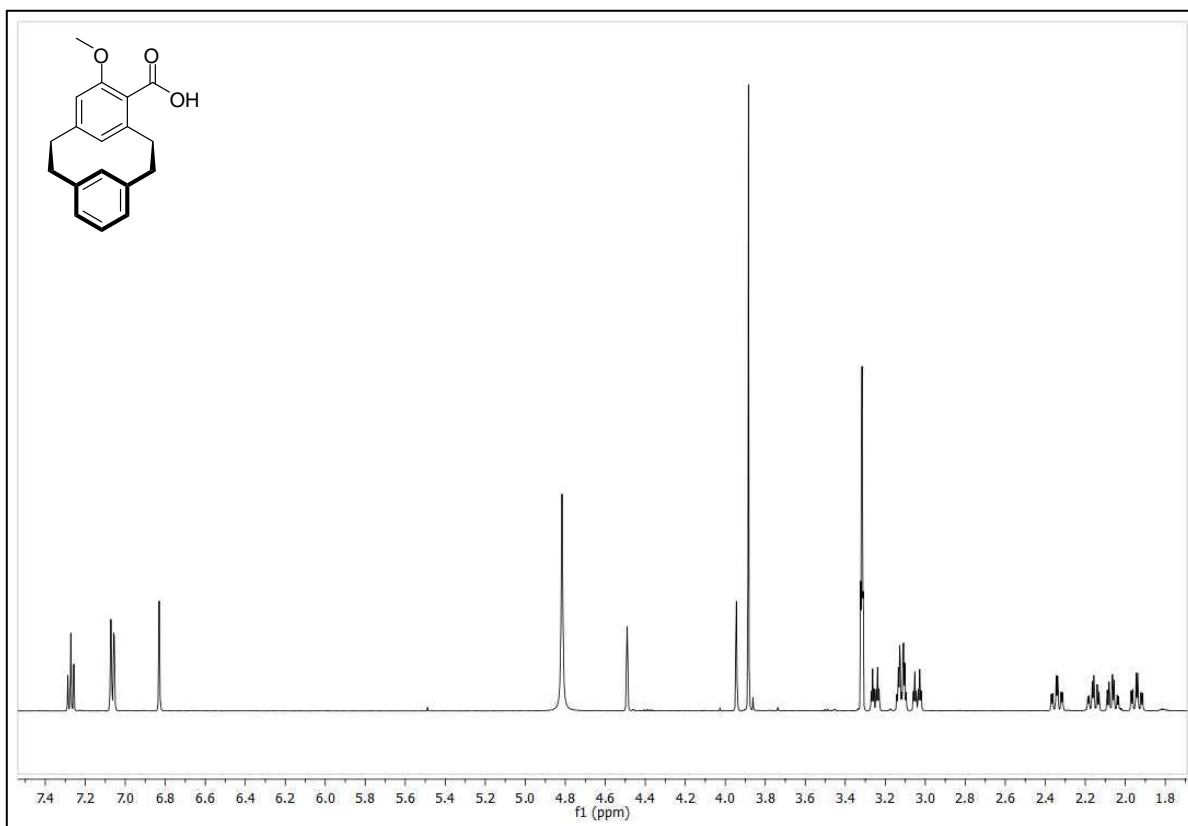

<sup>13</sup>C NMR (100 MHz, CDCl<sub>3</sub>)

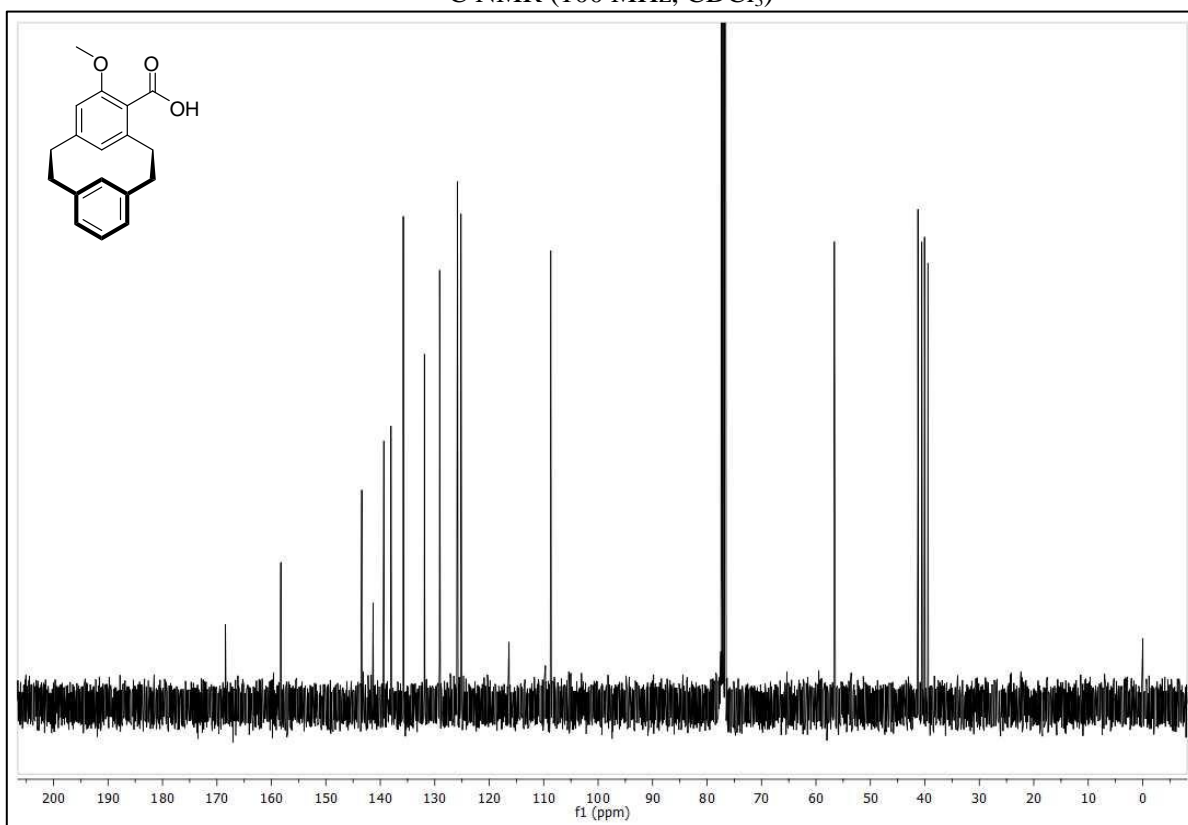

**(*R<sub>p</sub>*)-(+)-5-Methoxy[2.2]metacyclophane-4-carbaldehyde (11e)**

<sup>1</sup>H NMR (400 MHz, CDCl<sub>3</sub>)

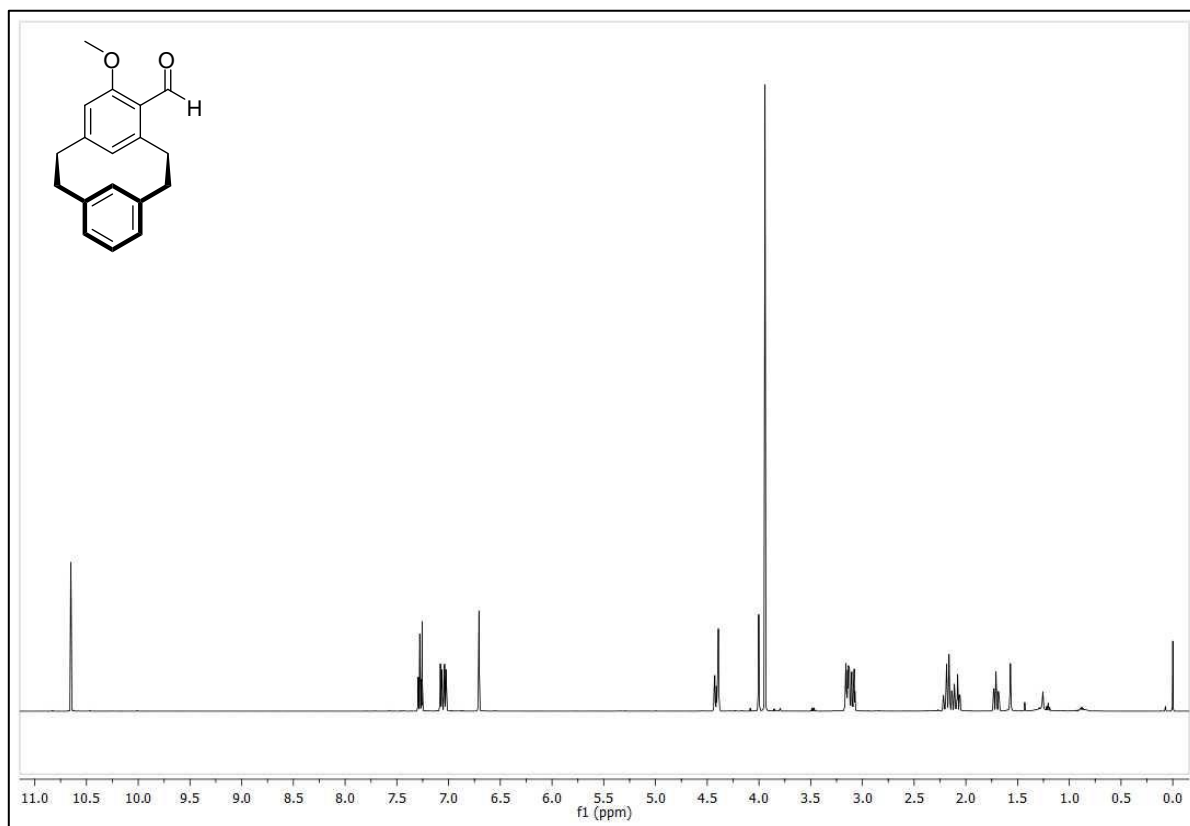

<sup>13</sup>C NMR (100 MHz, CDCl<sub>3</sub>)

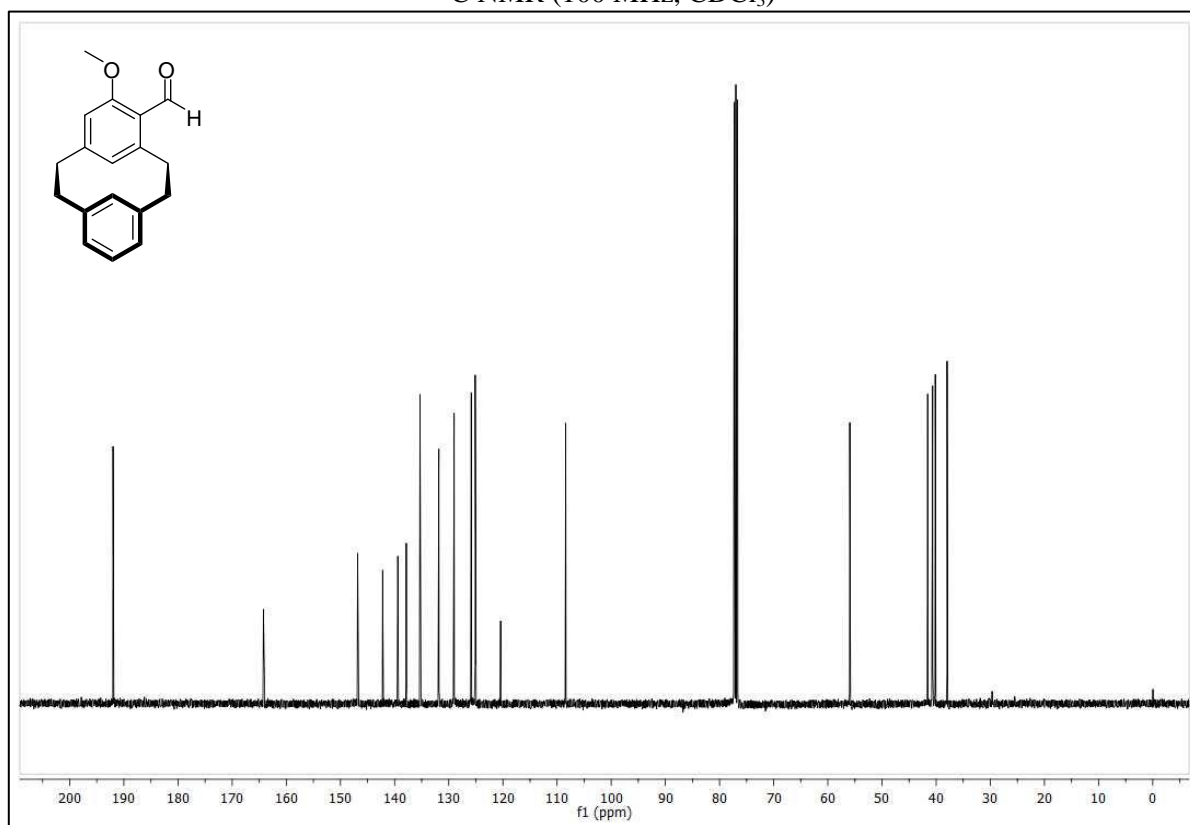

**(*R<sub>p</sub>*)-(-)-4-Iodo-5-methoxy[2.2]metacyclophane (11f)**

<sup>1</sup>H NMR (500 MHz, CDCl<sub>3</sub>)

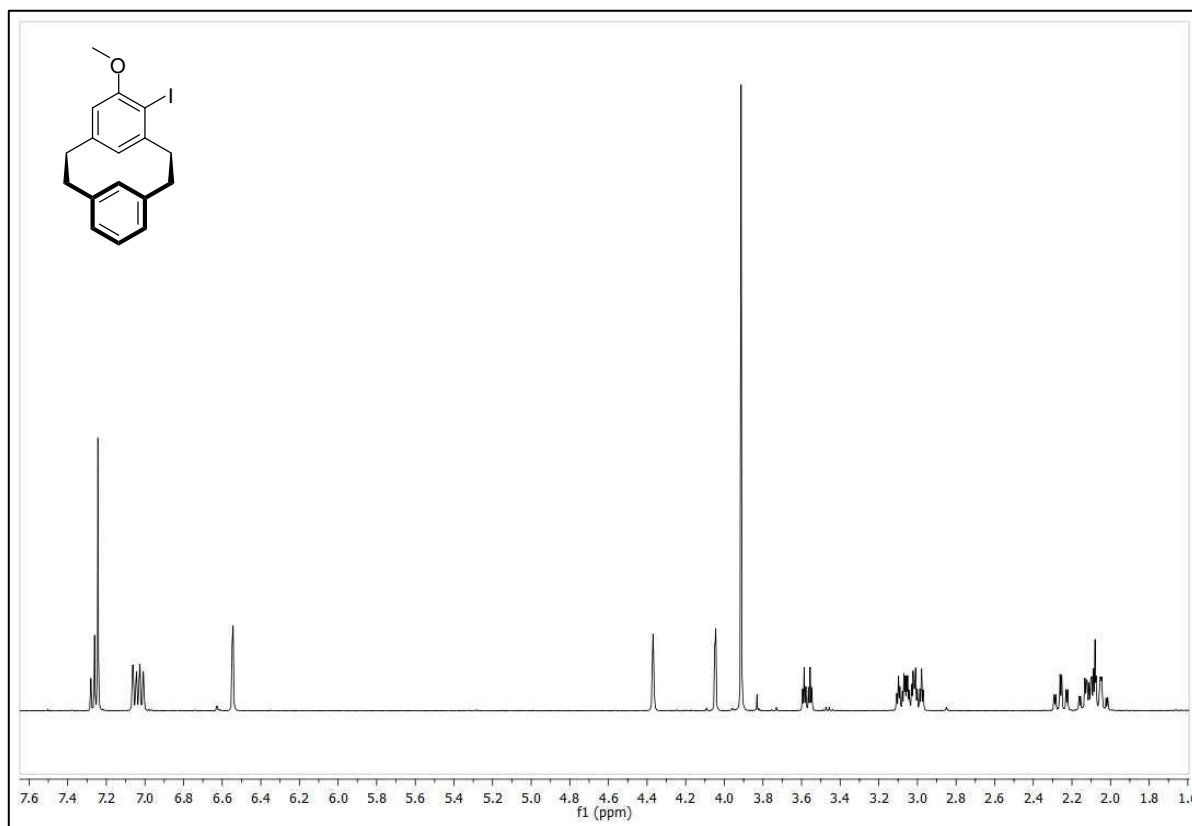

<sup>13</sup>C NMR (100 MHz, CDCl<sub>3</sub>)

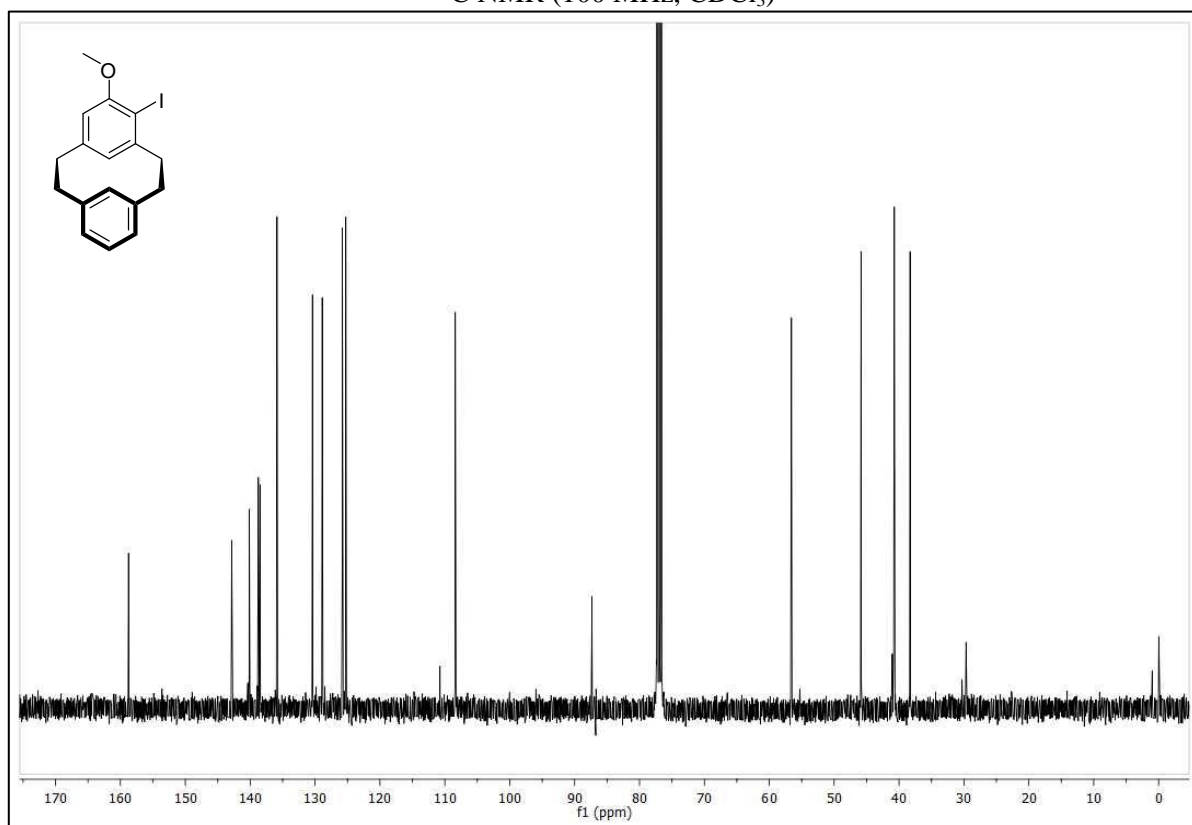

**(*R<sub>p</sub>*)-(-)-5-Methoxy[2.2]metacyclophane-4-phosphonic acid diethyl ester (11g)**

<sup>1</sup>H NMR (500 MHz, CD<sub>3</sub>OD)

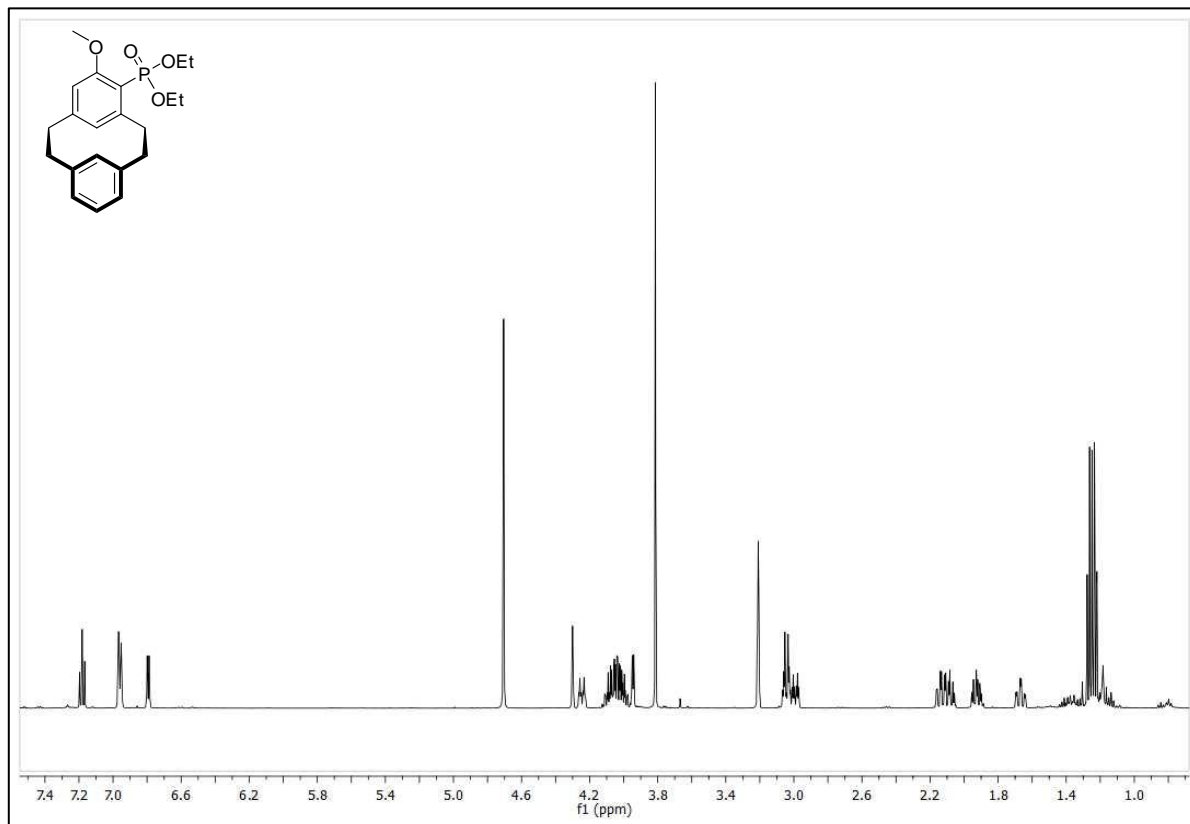

<sup>13</sup>C NMR (100 MHz, CD<sub>3</sub>OD)

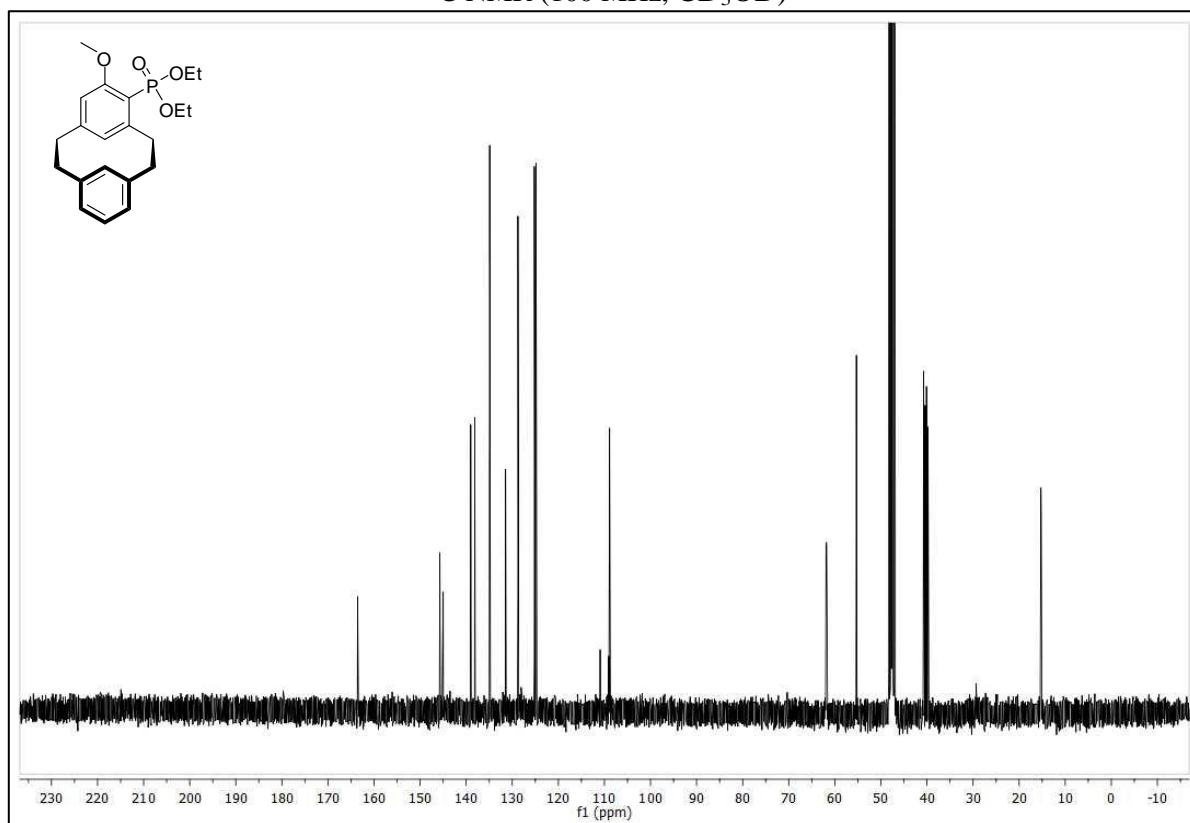

$^{31}\text{P}$  NMR (162 MHz,  $\text{CD}_3\text{OD}$ )

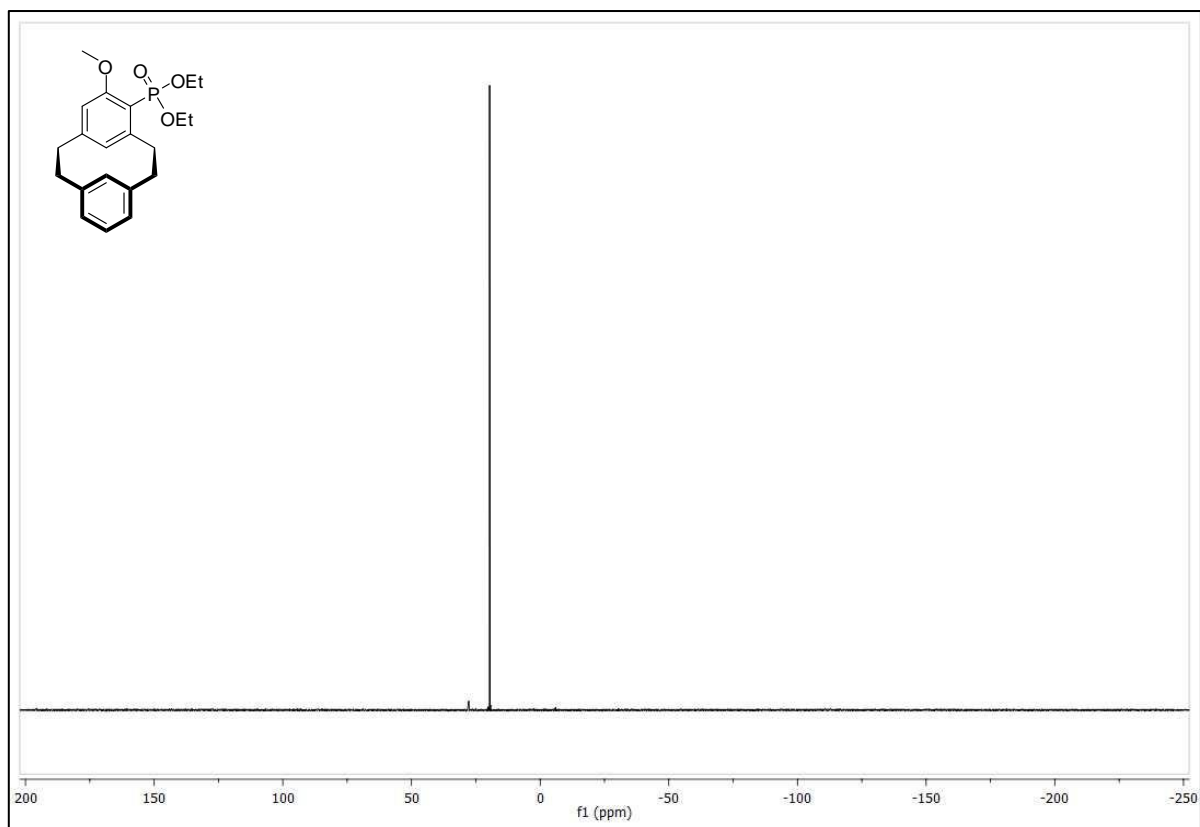

**(*R<sub>p</sub>*)-(-)-Diphenyl(5-methoxy[2.2]metacylophan-4-yl)phosphine oxide (11h)**

<sup>1</sup>H NMR (500 MHz, CDCl<sub>3</sub>)

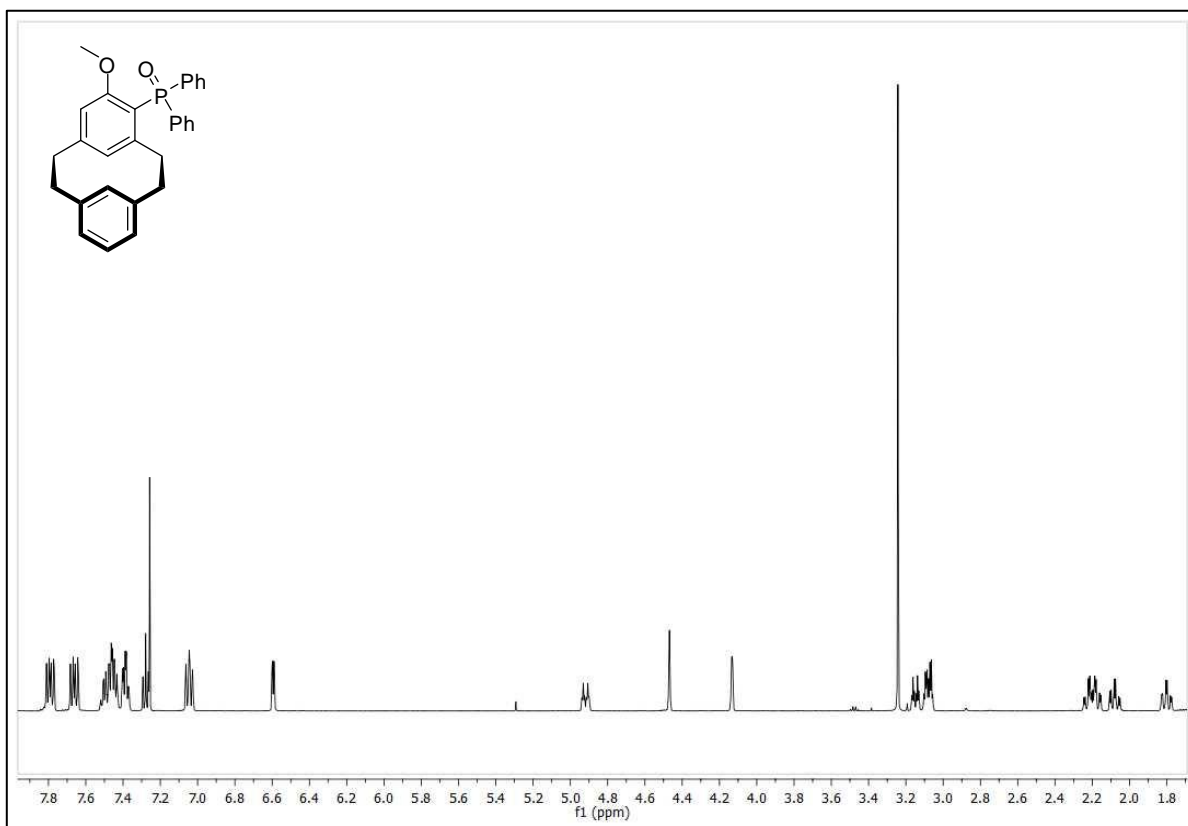

<sup>13</sup>C NMR (100 MHz, CDCl<sub>3</sub>)

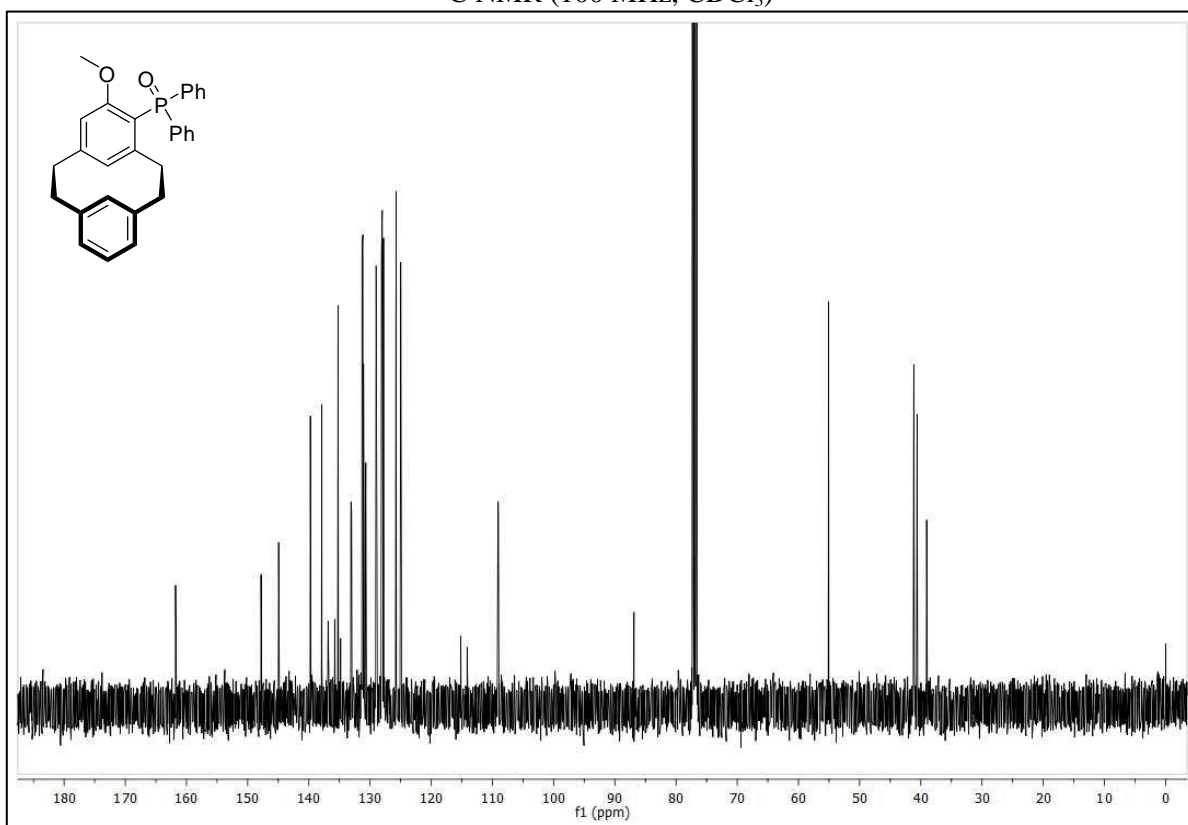

$^{31}\text{P}$  NMR (162 MHz,  $\text{CDCl}_3$ )

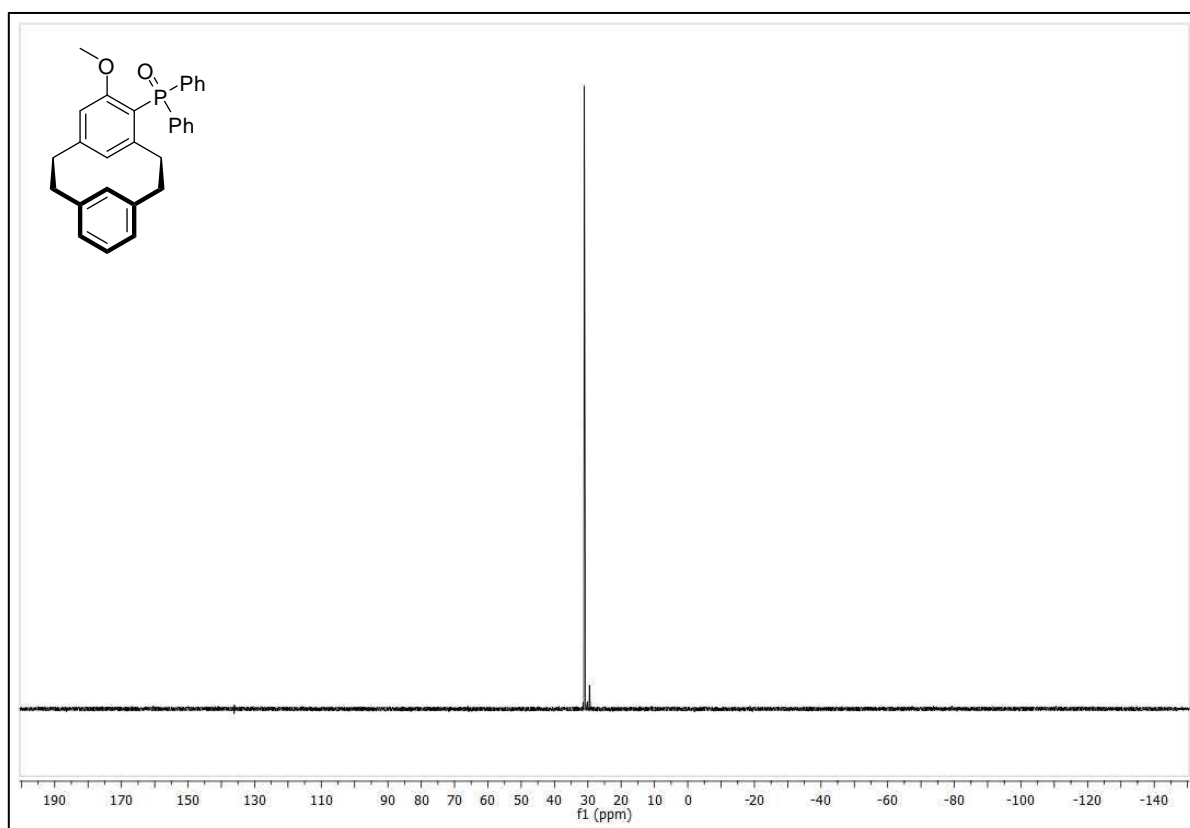

**(*R<sub>p</sub>*)-(+)-*N,N*-Diisopropyl-4-formyl-[2.2]metacyclophane-5-carboxamide (11i)**

<sup>1</sup>H NMR (400 MHz, CDCl<sub>3</sub>)

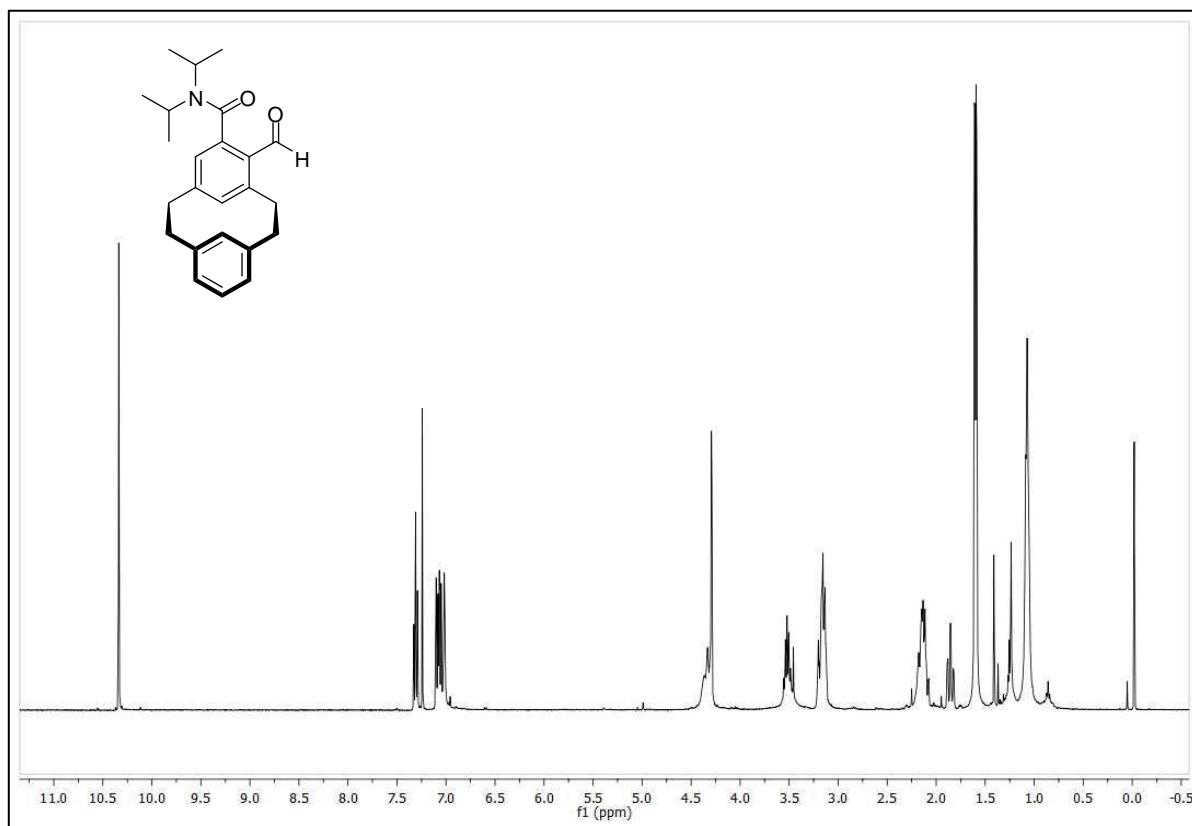

<sup>13</sup>C NMR (100 MHz, CDCl<sub>3</sub>)

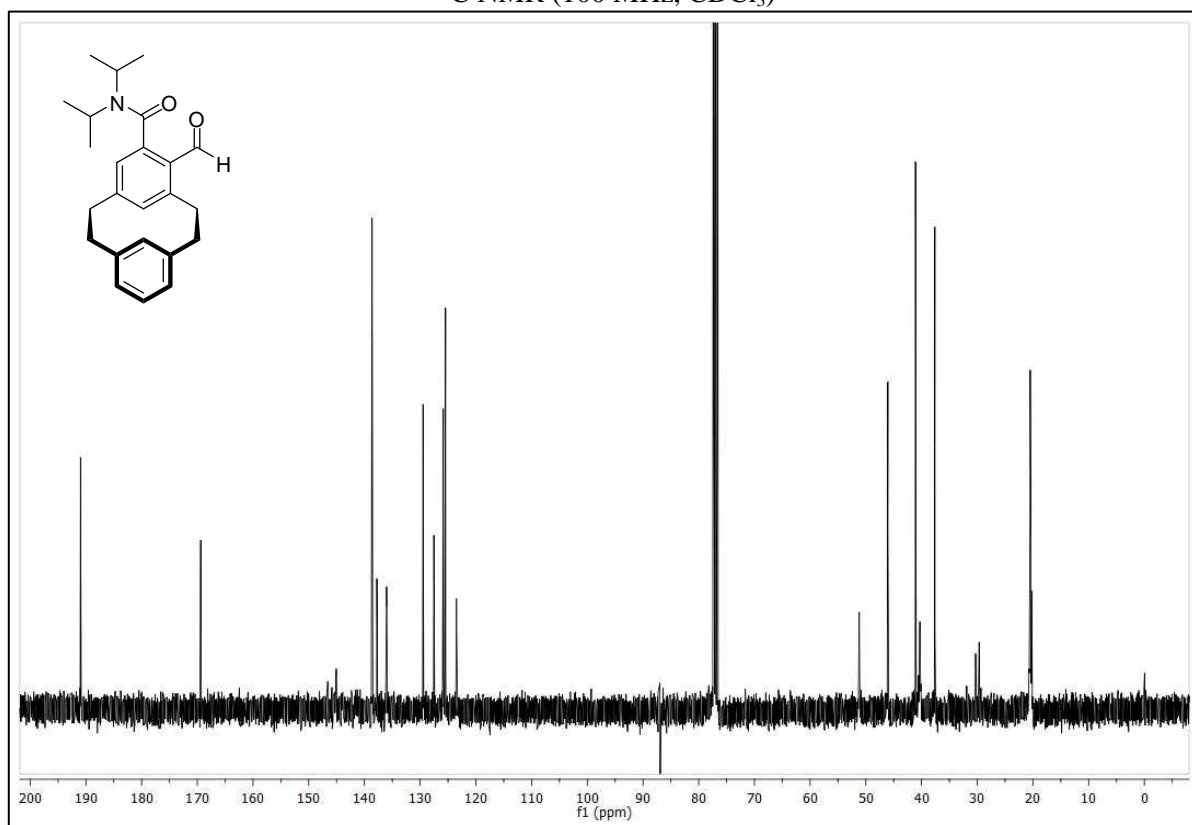



**(*R<sub>p</sub>*)-(-)-5,13-Dimethoxy[2.2]metacyclophane-4-phosphonic acid diethyl ester (11j)**

<sup>1</sup>H NMR (400 MHz, CDCl<sub>3</sub>)

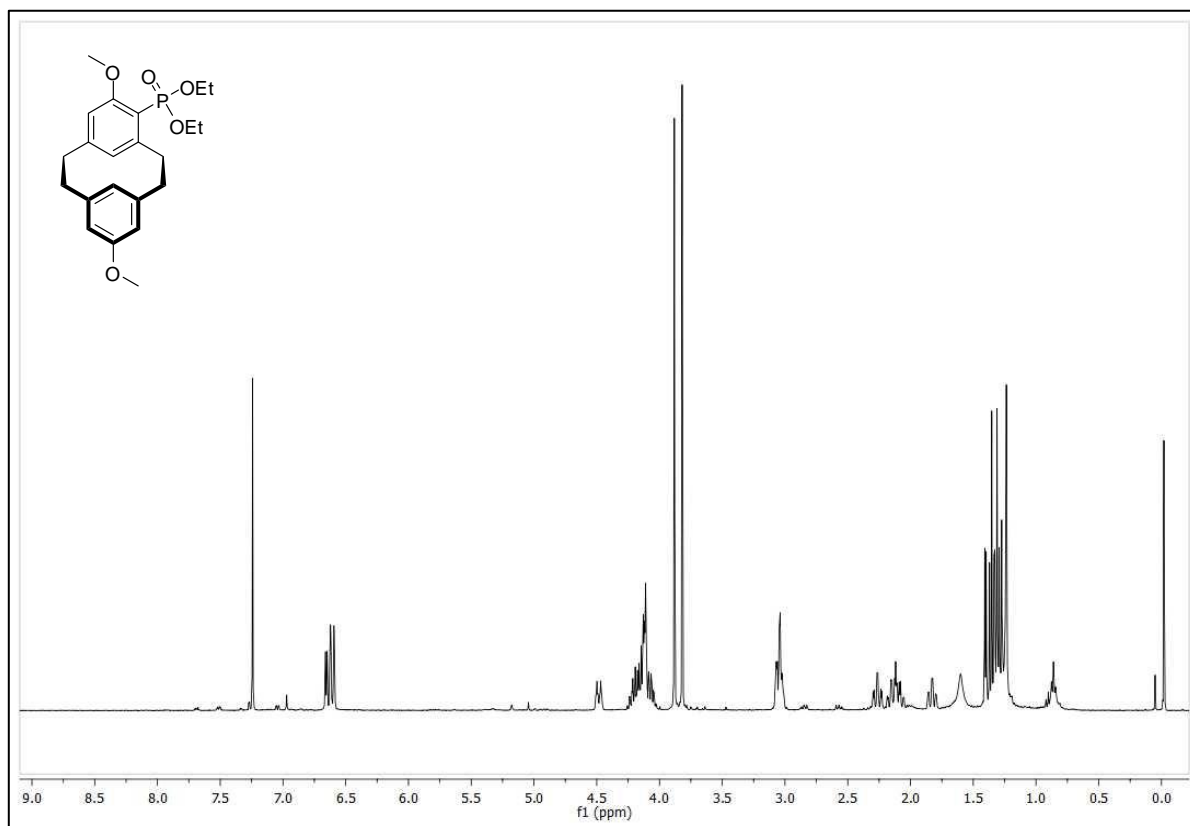

<sup>13</sup>C NMR (100 MHz, CDCl<sub>3</sub>)

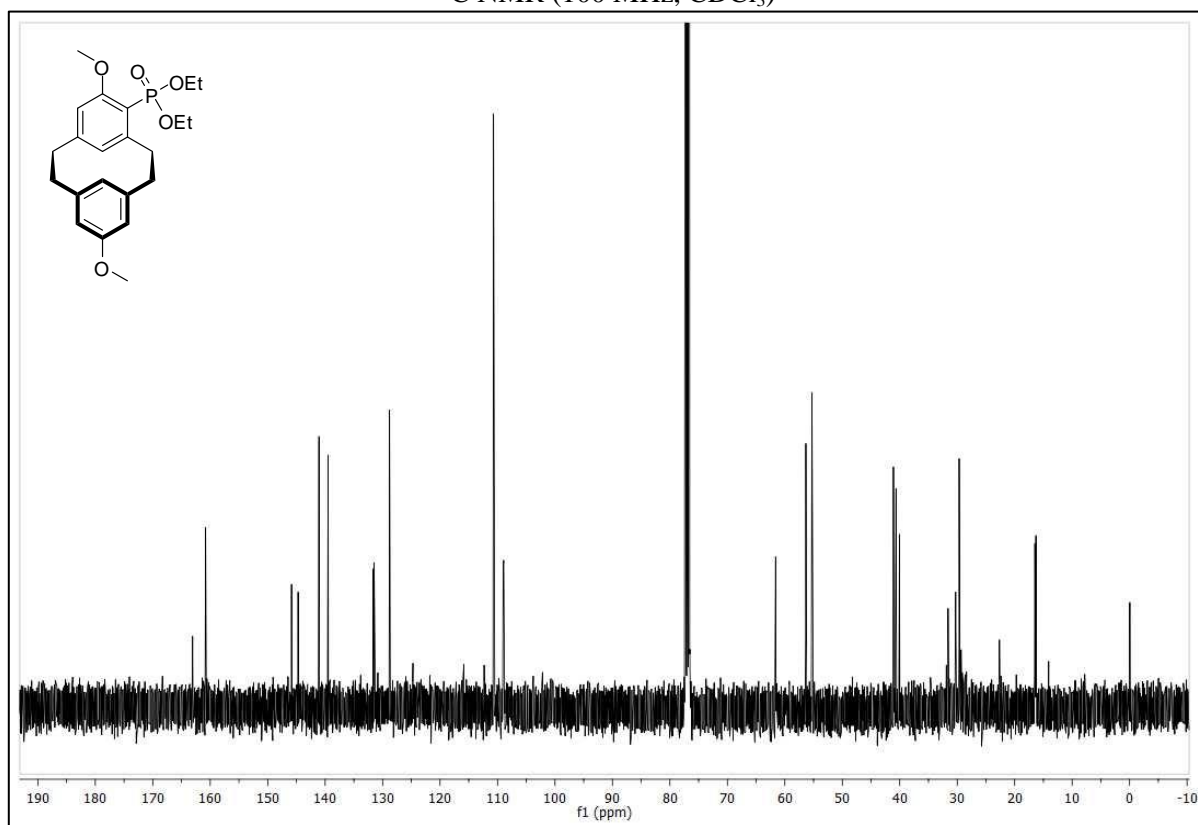

$^{31}\text{P}$  NMR (162 MHz,  $\text{CDCl}_3$ )

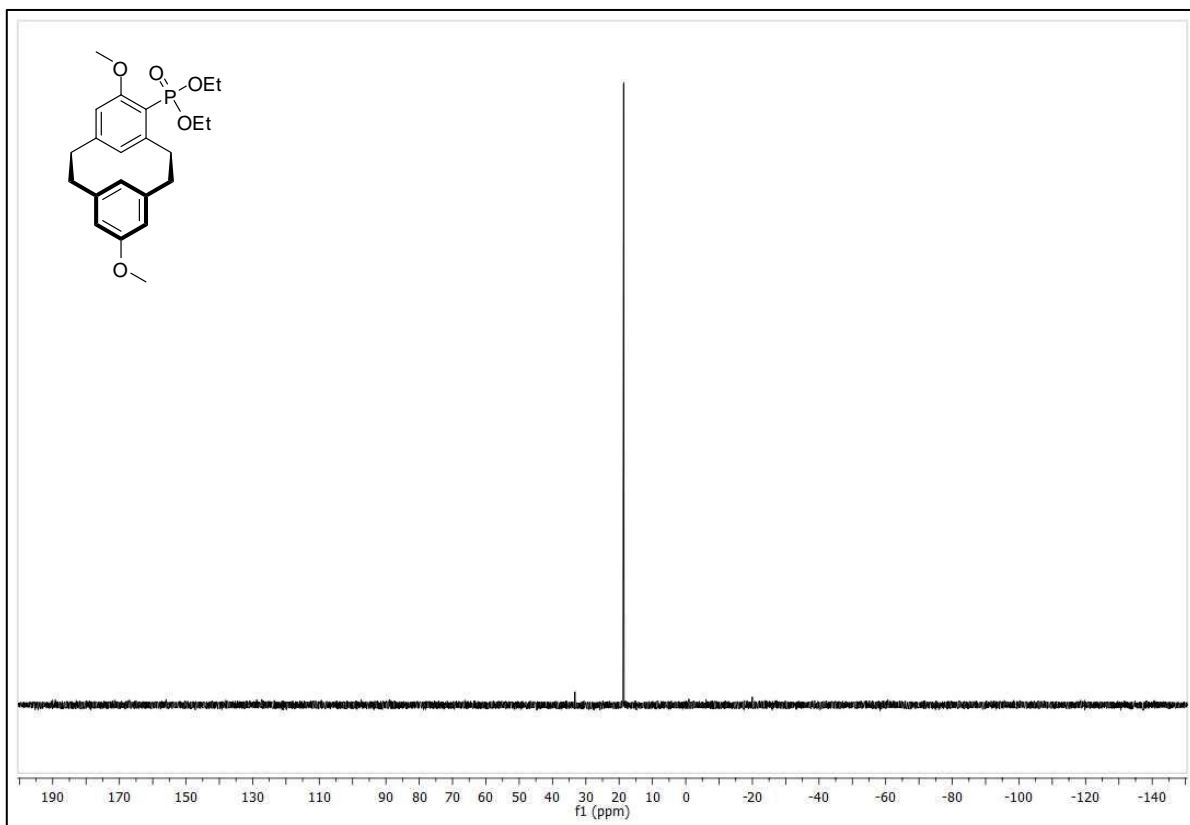

**(*R<sub>p</sub>*)-(+)-5,13-Dimethoxy[2.2]metacyclophane-4-carbaldehyde (11k)**

<sup>1</sup>H NMR (400 MHz, CDCl<sub>3</sub>)

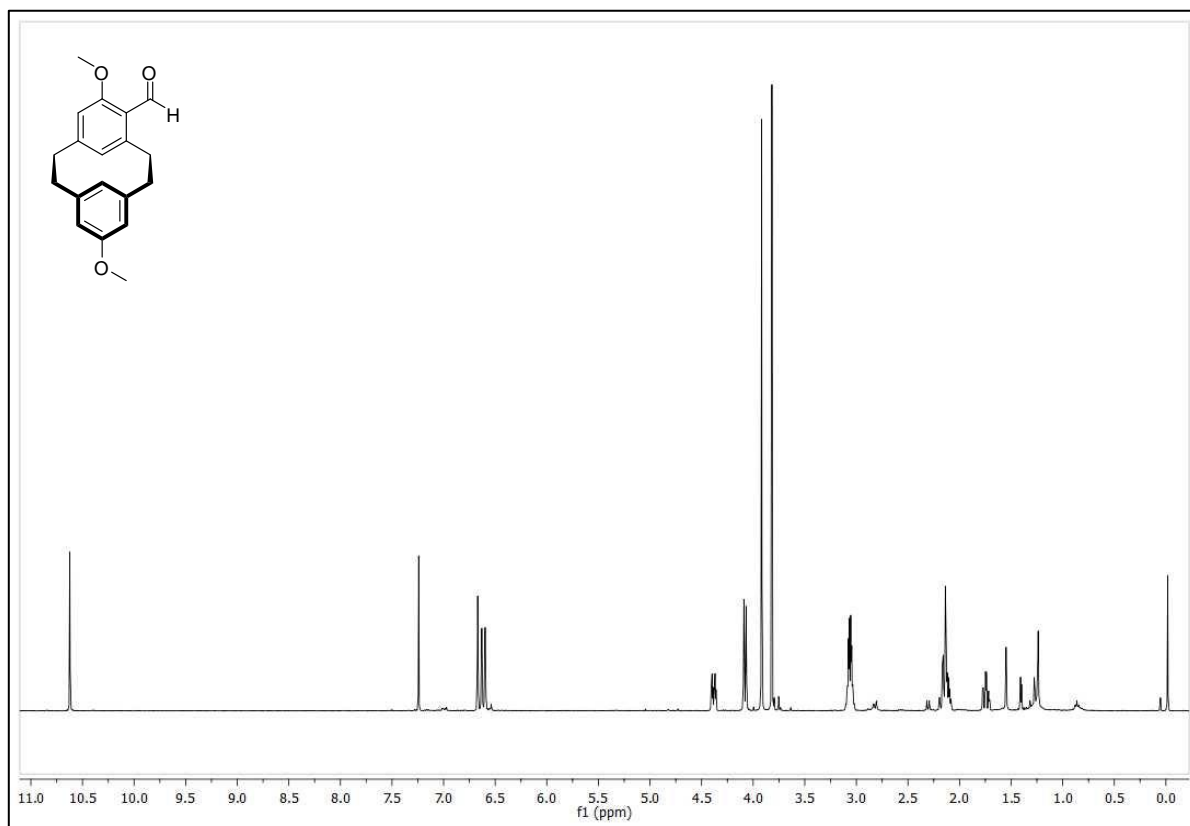

<sup>13</sup>C NMR (100 MHz, CDCl<sub>3</sub>)

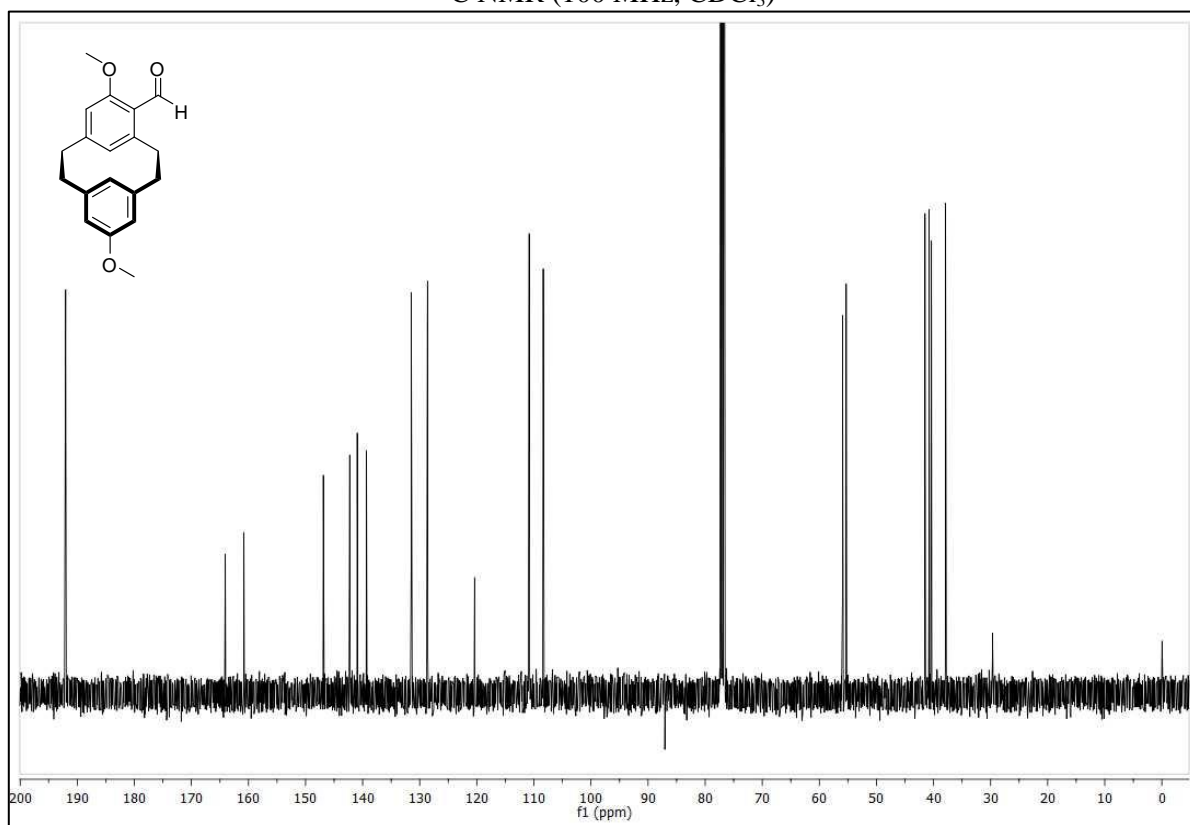

## Synthesis and analysis of compound **9a-D<sub>1</sub>**

**4-Deuterio-5-methoxy[2.2]metacyclophane (9a-D<sub>1</sub>).** A solution of 5-methoxy[2.2]metacyclophane **9a** (25 mg, 0.11 mmol) in THF (10 mL) at -78 °C was treated dropwise with BuLi (2.50 M, 0.46 mL, 0.12 mmol) and stirred for 5 min. KO<sup>t</sup>Bu (1.0 M in THF, 0.12 mL, 0.12 mmol) was added dropwise, the reaction mixture was stirred for 15 min at -78 °C and CD<sub>3</sub>OD (33 μL) added. The reaction mixture was warmed under N<sub>2</sub> to rt and the solvent removed under reduced pressure. Ethyl acetate (20 mL) was added to the residue, washed with HCl (2 M, 3 x 10 mL), dried over sodium sulfate and concentrated to dryness to give **9a-D<sub>1</sub>** as a colourless solid (23 mg, 88%, 75% D incorporation). <sup>1</sup>H NMR (500 MHz, CDCl<sub>3</sub>) δ 7.24 (t, *J* = 7.4 Hz, 1H), 7.03 (d, *J* = 7.3 Hz, 2H), 6.64 (s, 1H), 4.37 (s, 1H), 3.97 (s, 1H), 3.84 (s, *J* = 7.6 Hz, 3H), 3.13-2.98 (m, 4H), 2.19-2.04 (m, 4H). <sup>13</sup>C NMR (125 MHz, CDCl<sub>3</sub>) δ 160.8, 140.5, 140.5, 140.5, 139.1, 136.4, 130.0, 128.7, 125.5, 111.0, 110.9, 55.5, 41.3, 41.2, 41.0. <sup>2</sup>H NMR (92.07 MHz, CH<sub>2</sub>Cl<sub>2</sub>) δ 6.66 (s). EI-HRMS [M]<sup>+</sup>: 239.1422, C<sub>17</sub>H<sub>17</sub>DO requires 239.1420.

### 4-Deuterio-5-methoxy[2.2]metacyclophane (**9a-D<sub>1</sub>**)

<sup>1</sup>H NMR (500 MHz, CDCl<sub>3</sub>)

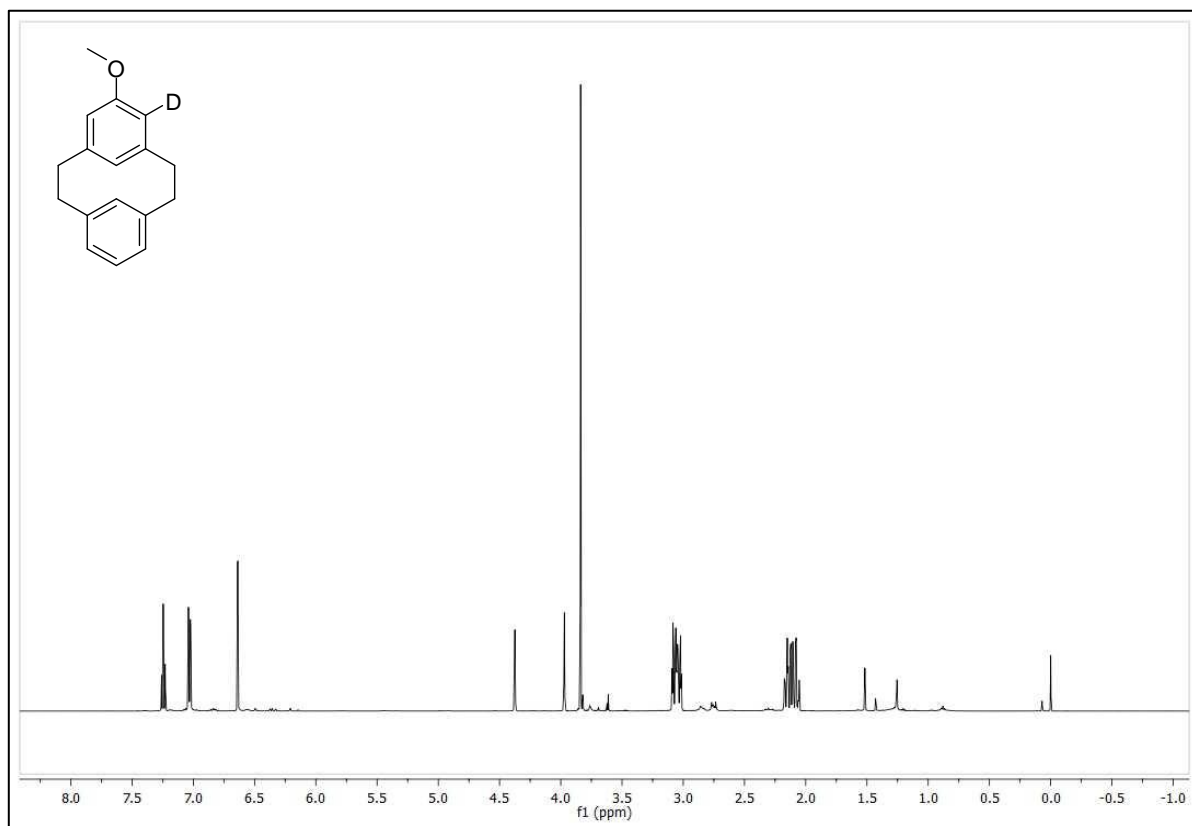

<sup>13</sup>C NMR (125 MHz, CDCl<sub>3</sub>)

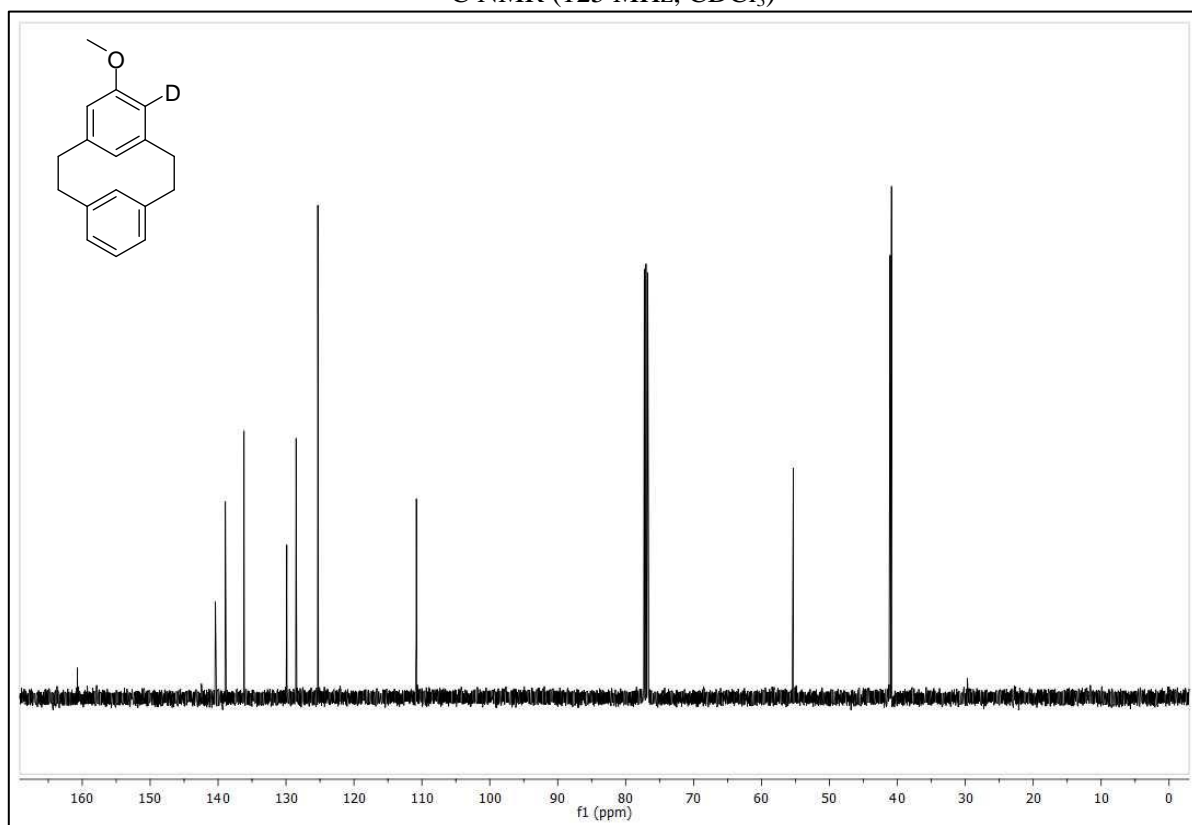

$^2\text{H}$  NMR (92.07 MHz,  $\text{CH}_2\text{Cl}_2$ )

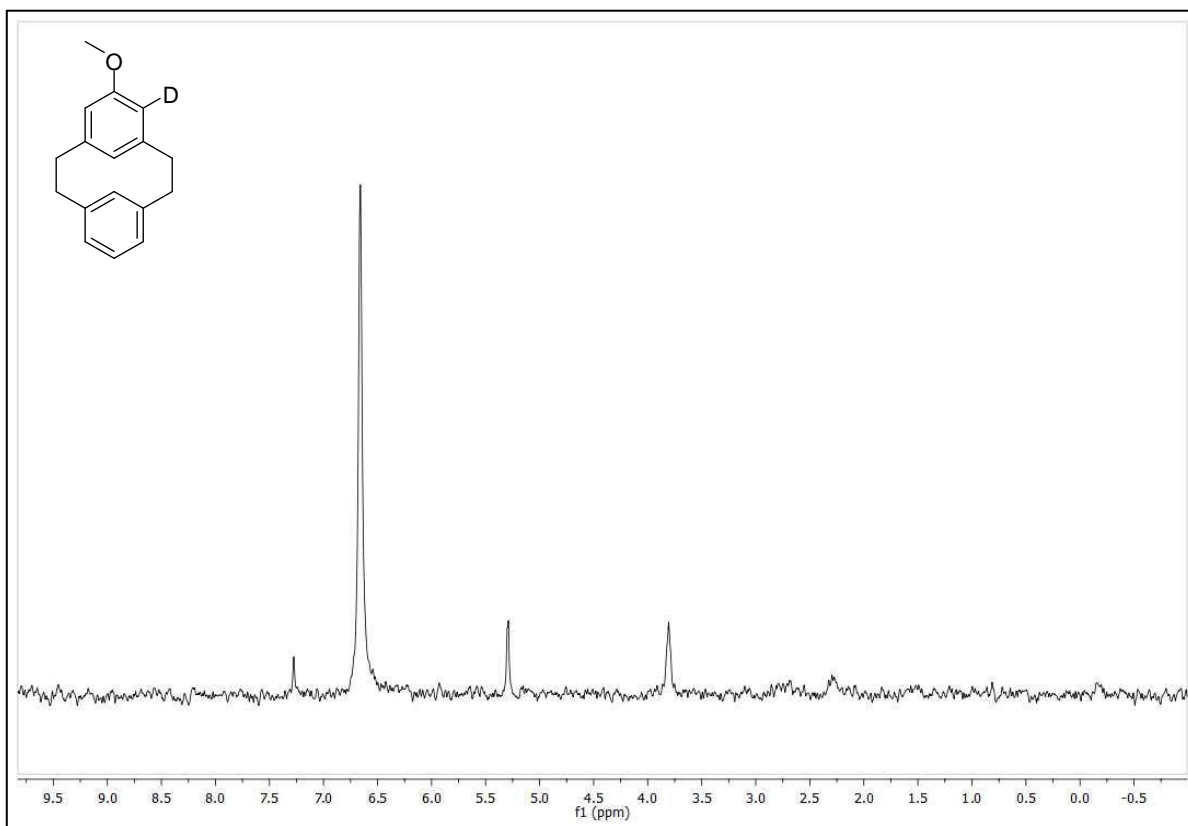

## Racemization Plots Data for Compounds **11a-c**

**General procedure for the racemization of [2.2]metacyclophanes 11a-c.** In a round-bottom flask equipped with a reflux condenser, a sample of enantioenriched [2.2]metacyclophane **11a-c** (0.5 mg) was dissolved in *N*-methyl-2-pyrrolidone (1 mL) and heated at 453 K. At a specified time interval, a sample (approx. vol. 100  $\mu$ L) was taken and rapidly cooled to room temperature with an ice bath. Heptane (approx. vol. 0.5 mL) was added and, after a short micro extraction, the upper heptane layer was isolated and submitted for HPLC analysis.

**Determination of rate constant and racemization barriers.** The inversion barriers ( $\Delta G^*$ ) were calculated on the basis of the absolute rate equation<sup>7,8</sup> assuming a unitary transmission coefficient. The rate constants were determined *via* a first-order integrated law plot considering the racemization of an optical antipode as a reversible first order reaction, where the forward and reverse reaction-rate constants  $k_f$  and  $k_r$  are identical:

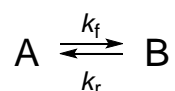

and  $k_f = k_r = k_i$  (inversion constant).

(*R<sub>p</sub>*)-(-)-5-Methoxy[2.2]metacyclophane-4-carboxylic acid ethyl ester (**11a**)

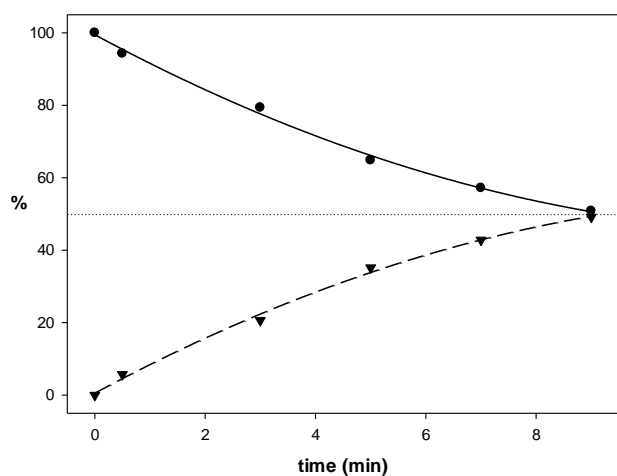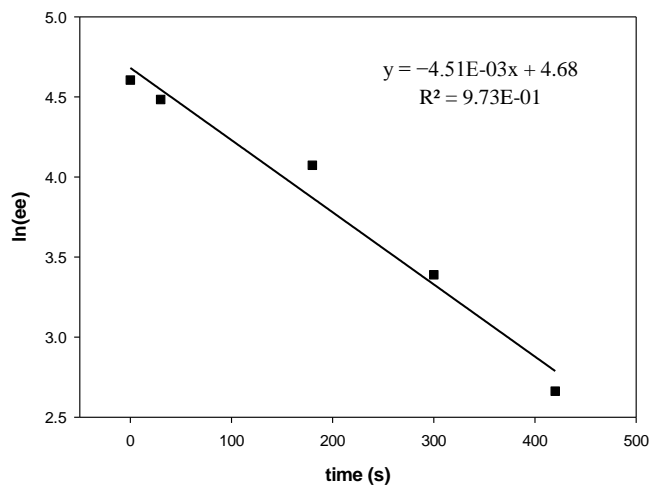

T = 453.0 K

$k'$  ( $\times 10^5$ ) = 450 s<sup>-1</sup>

$k_i$  ( $\times 10^5$ ) = 225 s<sup>-1</sup>

$\Delta G^*_{453}$  = 141.6 kJ/mol (33.8 kcal/mol)

(*R<sub>p</sub>*)-(-)-5-(*N,N*-diisopropylcarbamoyl)[2.2]metacyclophane-4-carboxylic acid ethyl ester (**11b**)

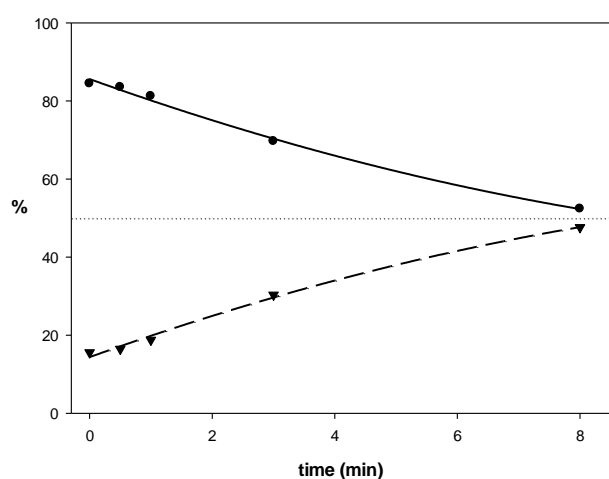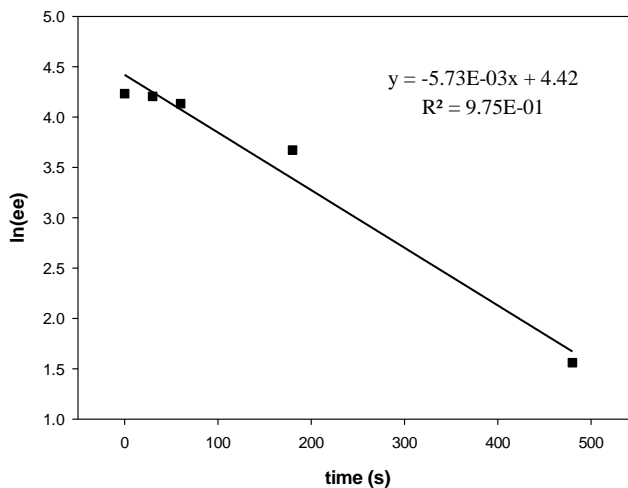

T = 453.0 K

$k'$  ( $\times 10^5$ ) = 572 s<sup>-1</sup>

$k_i$  ( $\times 10^5$ ) = 286 s<sup>-1</sup>

$\Delta G^*_{453}$  = 134.5 kJ/mol (32.1 kcal/mol)



(*R<sub>p</sub>*)-(-)-5,13-Dimethoxy[2.2]metacyclophane-4-carboxylic acid ethyl ester (**11c**)

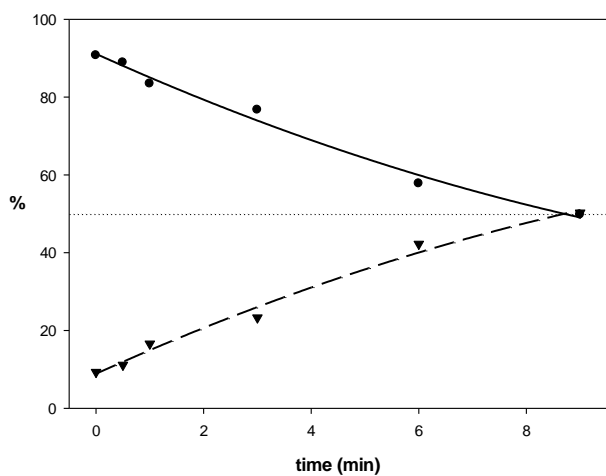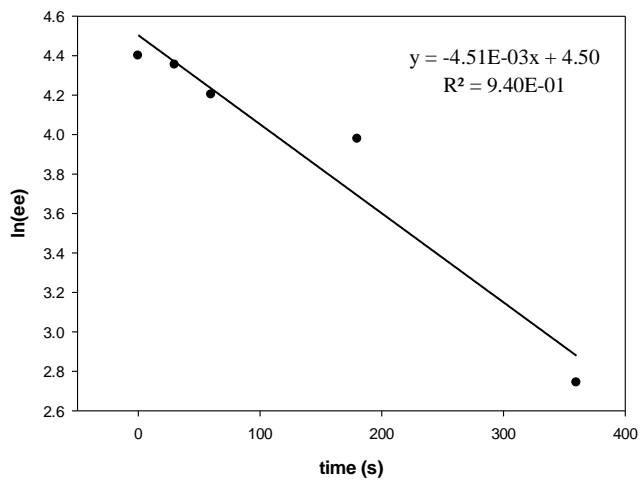

$$T = 453.0 \text{ K}$$

$$k' (x 10^5) = 451 \text{ s}^{-1}$$

$$k_i (x 10^5) = 225.5 \text{ s}^{-1}$$

$$\Delta G_{453}^* = 135.4 \text{ kJ/mol (32.4 kcal/mol)}$$

## References

1. W. G. Kofron and L. M. Baclawski, *J. Org. Chem.* 1976, **41**, 1879.
2. G. G. Pagani, G. G. Caccialanza and P. P. Borgna, *Farmaco Sci.* 1973, **28**, 835.
3. M. Blangetti, P. Fleming and D. F. O'Shea, *Beilstein J. Org. Chem.* 2011, **7**, 1249.
4. S. A. Sherrod and R. L. Da Costa, *Tetrahedron Lett.* 1973, **23**, 2083.
5. G. J. Bodwell, T. J. Houghton, J. Kennedy and M. R. Mannion, *Angew. Chem., Int. Ed.* 1996, **35**, 2121.
6. T. Sato, K. Torizuka, R. Komaki and H. Atobe, *J. Chem. Soc., Perkin Trans. 2* 1980, **4**, 561.
7. (a) S. Glasstone, K. J. Laidler and H. Eyring, *The theory of rate processes*, McGraw-Hill Book Co., New York, N.Y., 1941. (b) F. W. Cagle Jr and H. Eyring, *J. Am. Chem. Soc.* 1951, **73**, 5628.
8. C. Glotzmann, E. Langer, H. Lehner and K. Schlogl, *Monatsh. Chem.* 1974, **105**, 907.

### X-Ray Structural Data for (*R<sub>p</sub>*)-11a

Table 1. Crystal data and structure refinement for (*R<sub>p</sub>*)-11a

|                                   |                                                                                             |
|-----------------------------------|---------------------------------------------------------------------------------------------|
| Identification code               | <b>(<i>R<sub>p</sub></i>)-11a</b>                                                           |
| Empirical formula                 | C <sub>20</sub> H <sub>22</sub> O <sub>3</sub>                                              |
| Formula weight                    | 310.38                                                                                      |
| Temperature                       | 100(2) K                                                                                    |
| Wavelength                        | 1.54184 Å                                                                                   |
| Crystal system                    | Monoclinic                                                                                  |
| Space group                       | P2 <sub>1</sub> (#4)                                                                        |
| Unit cell dimensions              | a = 8.15436(7) Å α = 90°.<br>b = 8.76221(7) Å β = 107.081(1)°.<br>c = 12.1310(1) Å γ = 90°. |
| Volume                            | 828.530(12) Å <sup>3</sup>                                                                  |
| Z                                 | 2                                                                                           |
| Density (calculated)              | 1.244 Mg/m <sup>3</sup>                                                                     |
| Absorption coefficient            | 0.658 mm <sup>-1</sup>                                                                      |
| F(000)                            | 332                                                                                         |
| Crystal size                      | 0.3840 x 0.2026 x 0.1554 mm <sup>3</sup>                                                    |
| Theta range for data collection   | 3.81 to 76.63°.                                                                             |
| Index ranges                      | -10 ≤ h ≤ 10, -10 ≤ k ≤ 11, -13 ≤ l ≤ 15                                                    |
| Reflections collected             | 16971                                                                                       |
| Independent reflections           | 3445 [R(int) = 0.0231]                                                                      |
| Completeness to theta = 76.63°    | 99.4 %                                                                                      |
| Absorption correction             | Analytical                                                                                  |
| Max. and min. transmission        | 0.926 and 0.842                                                                             |
| Refinement method                 | Full-matrix least-squares on F <sup>2</sup>                                                 |
| Data / restraints / parameters    | 3445 / 1 / 210                                                                              |
| Goodness-of-fit on F <sup>2</sup> | 1.067                                                                                       |
| Final R indices [I > 2σ(I)]       | R1 = 0.0269, wR2 = 0.0728                                                                   |
| R indices (all data)              | R1 = 0.0273, wR2 = 0.0732                                                                   |
| Absolute structure parameter      | 0.06(13)                                                                                    |
| Largest diff. peak and hole       | 0.193 and -0.172 e.Å <sup>-3</sup>                                                          |

Table 2. Atomic coordinates (x 10<sup>4</sup>) and equivalent isotropic displacement parameters (Å<sup>2</sup> x 10<sup>3</sup>) for (*R<sub>p</sub>*)-11a. U(eq) is defined as one third of the trace of the orthogonalized U<sup>ij</sup> tensor.

| Atom  | x        | y        | z        | U(eq) |
|-------|----------|----------|----------|-------|
| C(1)  | 3351(1)  | 8565(1)  | 1417(1)  | 17(1) |
| C(7)  | 1898(1)  | 7468(1)  | 962(1)   | 18(1) |
| O(1)  | 2069(1)  | 6125(1)  | 816(1)   | 32(1) |
| O(2)  | 395(1)   | 8182(1)  | 734(1)   | 21(1) |
| C(8)  | -1139(1) | 7283(1)  | 190(1)   | 23(1) |
| C(9)  | -1502(2) | 7313(1)  | -1101(1) | 24(1) |
| C(2)  | 4097(1)  | 9240(1)  | 629(1)   | 17(1) |
| O(3)  | 3311(1)  | 8898(1)  | -503(1)  | 20(1) |
| C(10) | 4022(2)  | 9571(1)  | -1337(1) | 24(1) |
| C(3)  | 5560(1)  | 10145(1) | 1020(1)  | 18(1) |

|       |         |          |         |       |
|-------|---------|----------|---------|-------|
| C(4)  | 6183(1) | 10496(1) | 2195(1) | 17(1) |
| C(5)  | 5291(1) | 9975(1)  | 2939(1) | 17(1) |
| C(6)  | 3968(1) | 8908(1)  | 2588(1) | 17(1) |
| C(11) | 7962(1) | 11149(1) | 2695(1) | 19(1) |
| C(12) | 9311(1) | 9837(1)  | 3114(1) | 21(1) |
| C(13) | 3520(1) | 7945(1)  | 3492(1) | 21(1) |
| C(14) | 4882(2) | 6637(1)  | 3908(1) | 23(1) |
| C(15) | 8868(1) | 8897(1)  | 4030(1) | 20(1) |
| C(16) | 9405(1) | 9339(1)  | 5187(1) | 24(1) |
| C(17) | 8622(2) | 8726(2)  | 5963(1) | 27(1) |
| C(18) | 7217(2) | 7758(1)  | 5583(1) | 25(1) |
| C(19) | 6652(1) | 7300(1)  | 4431(1) | 21(1) |
| C(20) | 7583(1) | 7791(1)  | 3692(1) | 20(1) |

Table 3. Bond lengths [Å] and angles [°] for (**R<sub>p</sub>**)-**11a**.

|              |            |
|--------------|------------|
| C(1)–C(6)    | 1.3938(14) |
| C(1)–C(2)    | 1.4056(14) |
| C(1)–C(7)    | 1.4989(14) |
| C(7)–O(1)    | 1.2043(14) |
| C(7)–O(2)    | 1.3312(13) |
| O(2)–C(8)    | 1.4615(12) |
| C(8)–C(9)    | 1.5056(16) |
| C(8)–H(8A)   | 0.9900     |
| C(8)–H(8B)   | 0.9900     |
| C(9)–H(9A)   | 0.9800     |
| C(9)–H(9B)   | 0.9800     |
| C(9)–H(9C)   | 0.9800     |
| C(2)–O(3)    | 1.3670(13) |
| C(2)–C(3)    | 1.3946(15) |
| O(3)–C(10)   | 1.4332(13) |
| C(10)–H(10A) | 0.9800     |
| C(10)–H(10B) | 0.9800     |
| C(10)–H(10C) | 0.9800     |
| C(3)–C(4)    | 1.3997(14) |
| C(3)–H(3)    | 0.9500     |
| C(4)–C(5)    | 1.3913(15) |
| C(4)–C(11)   | 1.5109(14) |
| C(5)–C(6)    | 1.3965(14) |
| C(5)–H(5)    | 0.9500     |
| C(6)–C(13)   | 1.5107(14) |
| C(11)–C(12)  | 1.5687(15) |
| C(11)–H(11A) | 0.9900     |
| C(11)–H(11B) | 0.9900     |
| C(12)–C(15)  | 1.5101(15) |
| C(12)–H(12A) | 0.9900     |
| C(12)–H(12B) | 0.9900     |
| C(13)–C(14)  | 1.5724(15) |
| C(13)–H(13A) | 0.9900     |
| C(13)–H(13B) | 0.9900     |
| C(14)–C(19)  | 1.5118(15) |
| C(14)–H(14A) | 0.9900     |
| C(14)–H(14B) | 0.9900     |
| C(15)–C(16)  | 1.3966(16) |
| C(15)–C(20)  | 1.3972(15) |
| C(16)–C(17)  | 1.3909(18) |
| C(16)–H(16)  | 0.9500     |
| C(17)–C(18)  | 1.3912(18) |

|                     |            |
|---------------------|------------|
| C(17)–H(17)         | 0.9500     |
| C(18)–C(19)         | 1.3958(16) |
| C(18)–H(18)         | 0.9500     |
| C(19)–C(20)         | 1.4015(16) |
| C(20)–H(20)         | 0.9500     |
|                     |            |
| C(6)–C(1)–C(2)      | 120.23(9)  |
| C(6)–C(1)–C(7)      | 121.54(9)  |
| C(2)–C(1)–C(7)      | 118.22(9)  |
| O(1)–C(7)–O(2)      | 124.59(10) |
| O(1)–C(7)–C(1)      | 124.61(10) |
| O(2)–C(7)–C(1)      | 110.79(9)  |
| C(7)–O(2)–C(8)      | 117.03(9)  |
| O(2)–C(8)–C(9)      | 109.92(9)  |
| O(2)–C(8)–H(8A)     | 109.7      |
| C(9)–C(8)–H(8A)     | 109.7      |
| O(2)–C(8)–H(8B)     | 109.7      |
| C(9)–C(8)–H(8B)     | 109.7      |
| H(8A)–C(8)–H(8B)    | 108.2      |
| C(8)–C(9)–H(9A)     | 109.5      |
| C(8)–C(9)–H(9B)     | 109.5      |
| H(9A)–C(9)–H(9B)    | 109.5      |
| C(8)–C(9)–H(9C)     | 109.5      |
| H(9A)–C(9)–H(9C)    | 109.5      |
| H(9B)–C(9)–H(9C)    | 109.5      |
| O(3)–C(2)–C(3)      | 124.64(9)  |
| O(3)–C(2)–C(1)      | 114.92(9)  |
| C(3)–C(2)–C(1)      | 120.41(9)  |
| C(2)–O(3)–C(10)     | 116.83(8)  |
| O(3)–C(10)–H(10A)   | 109.5      |
| O(3)–C(10)–H(10B)   | 109.5      |
| H(10A)–C(10)–H(10B) | 109.5      |
| O(3)–C(10)–H(10C)   | 109.5      |
| H(10A)–C(10)–H(10C) | 109.5      |
| H(10B)–C(10)–H(10C) | 109.5      |
| C(2)–C(3)–C(4)      | 119.30(10) |
| C(2)–C(3)–H(3)      | 120.4      |
| C(4)–C(3)–H(3)      | 120.4      |
| C(5)–C(4)–C(3)      | 119.09(10) |
| C(5)–C(4)–C(11)     | 119.15(9)  |
| C(3)–C(4)–C(11)     | 120.65(9)  |
| C(4)–C(5)–C(6)      | 121.74(9)  |
| C(4)–C(5)–H(5)      | 119.1      |
| C(6)–C(5)–H(5)      | 119.1      |
| C(1)–C(6)–C(5)      | 118.06(9)  |
| C(1)–C(6)–C(13)     | 121.82(9)  |
| C(5)–C(6)–C(13)     | 118.88(9)  |
| C(4)–C(11)–C(12)    | 110.63(9)  |
| C(4)–C(11)–H(11A)   | 109.5      |
| C(12)–C(11)–H(11A)  | 109.5      |
| C(4)–C(11)–H(11B)   | 109.5      |
| C(12)–C(11)–H(11B)  | 109.5      |
| H(11A)–C(11)–H(11B) | 108.1      |
| C(15)–C(12)–C(11)   | 109.97(8)  |
| C(15)–C(12)–H(12A)  | 109.7      |
| C(11)–C(12)–H(12A)  | 109.7      |
| C(15)–C(12)–H(12B)  | 109.7      |
| C(11)–C(12)–H(12B)  | 109.7      |
| H(12A)–C(12)–H(12B) | 108.2      |
| C(6)–C(13)–C(14)    | 109.95(8)  |

|                     |            |
|---------------------|------------|
| C(6)–C(13)–H(13A)   | 109.7      |
| C(14)–C(13)–H(13A)  | 109.7      |
| C(6)–C(13)–H(13B)   | 109.7      |
| C(14)–C(13)–H(13B)  | 109.7      |
| H(13A)–C(13)–H(13B) | 108.2      |
| C(19)–C(14)–C(13)   | 110.61(9)  |
| C(19)–C(14)–H(14A)  | 109.5      |
| C(13)–C(14)–H(14A)  | 109.5      |
| C(19)–C(14)–H(14B)  | 109.5      |
| C(13)–C(14)–H(14B)  | 109.5      |
| H(14A)–C(14)–H(14B) | 108.1      |
| C(16)–C(15)–C(20)   | 118.27(10) |
| C(16)–C(15)–C(12)   | 121.09(10) |
| C(20)–C(15)–C(12)   | 118.90(9)  |
| C(17)–C(16)–C(15)   | 120.18(11) |
| C(17)–C(16)–H(16)   | 119.9      |
| C(15)–C(16)–H(16)   | 119.9      |
| C(16)–C(17)–C(18)   | 120.52(11) |
| C(16)–C(17)–H(17)   | 119.7      |
| C(18)–C(17)–H(17)   | 119.7      |
| C(17)–C(18)–C(19)   | 120.32(11) |
| C(17)–C(18)–H(18)   | 119.8      |
| C(19)–C(18)–H(18)   | 119.8      |
| C(18)–C(19)–C(20)   | 118.06(11) |
| C(18)–C(19)–C(14)   | 121.59(10) |
| C(20)–C(19)–C(14)   | 118.69(10) |
| C(15)–C(20)–C(19)   | 121.73(10) |
| C(15)–C(20)–H(20)   | 119.1      |
| C(19)–C(20)–H(20)   | 119.1      |

Symmetry transformations used to generate equivalent atoms:

Table 4. Anisotropic displacement parameters ( $\text{\AA}^2 \times 10^3$ ) for (**R<sub>p</sub>**)-**11a**. The anisotropic displacement factor exponent takes the form:  $-2\pi^2 [ h^2 a^{*2} U^{11} + \dots + 2 h k a^* b^* U^{12} ]$

| Atom  | U <sup>11</sup> | U <sup>22</sup> | U <sup>33</sup> | U <sup>23</sup> | U <sup>13</sup> | U <sup>12</sup> |
|-------|-----------------|-----------------|-----------------|-----------------|-----------------|-----------------|
| C(1)  | 14(1)           | 15(1)           | 20(1)           | 1(1)            | 4(1)            | 1(1)            |
| C(7)  | 18(1)           | 19(1)           | 18(1)           | 1(1)            | 7(1)            | 0(1)            |
| O(1)  | 23(1)           | 18(1)           | 51(1)           | -1(1)           | 7(1)            | 0(1)            |
| O(2)  | 15(1)           | 21(1)           | 26(1)           | -4(1)           | 4(1)            | 0(1)            |
| C(8)  | 14(1)           | 28(1)           | 25(1)           | -3(1)           | 5(1)            | -4(1)           |
| C(9)  | 23(1)           | 25(1)           | 24(1)           | -5(1)           | 6(1)            | -4(1)           |
| C(2)  | 18(1)           | 16(1)           | 16(1)           | 0(1)            | 4(1)            | 3(1)            |
| O(3)  | 22(1)           | 23(1)           | 15(1)           | -1(1)           | 5(1)            | -4(1)           |
| C(10) | 28(1)           | 27(1)           | 16(1)           | 1(1)            | 7(1)            | -5(1)           |
| C(3)  | 18(1)           | 17(1)           | 18(1)           | 3(1)            | 6(1)            | 1(1)            |
| C(4)  | 17(1)           | 14(1)           | 20(1)           | 2(1)            | 4(1)            | 1(1)            |
| C(5)  | 18(1)           | 18(1)           | 16(1)           | 0(1)            | 4(1)            | 3(1)            |
| C(6)  | 16(1)           | 19(1)           | 18(1)           | 2(1)            | 6(1)            | 3(1)            |
| C(11) | 18(1)           | 19(1)           | 21(1)           | 0(1)            | 4(1)            | -2(1)           |
| C(12) | 16(1)           | 23(1)           | 23(1)           | -1(1)           | 5(1)            | 0(1)            |
| C(13) | 20(1)           | 25(1)           | 19(1)           | 2(1)            | 7(1)            | -2(1)           |
| C(14) | 26(1)           | 21(1)           | 22(1)           | 6(1)            | 8(1)            | -1(1)           |
| C(15) | 17(1)           | 19(1)           | 22(1)           | 2(1)            | 3(1)            | 4(1)            |
| C(16) | 20(1)           | 26(1)           | 23(1)           | 1(1)            | 0(1)            | 1(1)            |

|       |       |       |       |      |      |      |
|-------|-------|-------|-------|------|------|------|
| C(17) | 29(1) | 30(1) | 18(1) | 3(1) | 1(1) | 3(1) |
| C(18) | 27(1) | 27(1) | 20(1) | 7(1) | 6(1) | 3(1) |
| C(19) | 24(1) | 17(1) | 22(1) | 5(1) | 6(1) | 3(1) |
| C(20) | 21(1) | 17(1) | 21(1) | 1(1) | 4(1) | 4(1) |

Table 5. Hydrogen coordinates ( $\times 10^4$ ) and isotropic displacement parameters ( $\text{\AA}^2 \times 10^{-3}$ ) for (**R<sub>p</sub>**)-**11a**.

| Atom   | x     | y     | z     | U(eq) |
|--------|-------|-------|-------|-------|
| H(8A)  | -2131 | 7707  | 401   | 27    |
| H(8B)  | -965  | 6216  | 469   | 27    |
| H(9A)  | -1514 | 8373  | -1362 | 36    |
| H(9B)  | -2621 | 6843  | -1464 | 36    |
| H(9C)  | -608  | 6744  | -1316 | 36    |
| H(10A) | 4091  | 10681 | -1229 | 35    |
| H(10B) | 3287  | 9335  | -2115 | 35    |
| H(10C) | 5173  | 9159  | -1238 | 35    |
| H(3)   | 6128  | 10520 | 495   | 21    |
| H(5)   | 5590  | 10356 | 3706  | 21    |
| H(11A) | 7979  | 11824 | 3352  | 23    |
| H(11B) | 8269  | 11768 | 2102  | 23    |
| H(12A) | 9319  | 9177  | 2454  | 25    |
| H(12B) | 10471 | 10282 | 3431  | 25    |
| H(13A) | 2365  | 7494  | 3165  | 25    |
| H(13B) | 3497  | 8592  | 4156  | 25    |
| H(14A) | 4567  | 5998  | 4488  | 28    |
| H(14B) | 4885  | 5978  | 3246  | 28    |
| H(16)  | 10307 | 10059 | 5445  | 29    |
| H(17)  | 9050  | 8972  | 6759  | 33    |
| H(18)  | 6639  | 7406  | 6110  | 30    |
| H(20)  | 7334  | 7362  | 2942  | 24    |

Table 6. Torsion angles [ $^\circ$ ] for (**R<sub>p</sub>**)-**11a**.

|                      |             |
|----------------------|-------------|
| C(6)–C(1)–C(7)–O(1)  | -93.35(14)  |
| C(2)–C(1)–C(7)–O(1)  | 86.10(14)   |
| C(6)–C(1)–C(7)–O(2)  | 87.13(12)   |
| C(2)–C(1)–C(7)–O(2)  | -93.42(11)  |
| O(1)–C(7)–O(2)–C(8)  | -4.66(16)   |
| C(1)–C(7)–O(2)–C(8)  | 174.86(8)   |
| C(7)–O(2)–C(8)–C(9)  | -87.12(12)  |
| C(6)–C(1)–C(2)–O(3)  | -175.76(9)  |
| C(7)–C(1)–C(2)–O(3)  | 4.78(14)    |
| C(6)–C(1)–C(2)–C(3)  | 6.00(15)    |
| C(7)–C(1)–C(2)–C(3)  | -173.47(9)  |
| C(3)–C(2)–O(3)–C(10) | -2.29(15)   |
| C(1)–C(2)–O(3)–C(10) | 179.54(9)   |
| O(3)–C(2)–C(3)–C(4)  | 175.85(10)  |
| C(1)–C(2)–C(3)–C(4)  | -6.08(15)   |
| C(2)–C(3)–C(4)–C(5)  | -2.21(15)   |
| C(2)–C(3)–C(4)–C(11) | 165.67(9)   |
| C(3)–C(4)–C(5)–C(6)  | 10.92(15)   |
| C(11)–C(4)–C(5)–C(6) | -157.14(10) |
| C(2)–C(1)–C(6)–C(5)  | 2.40(15)    |
| C(7)–C(1)–C(6)–C(5)  | -178.15(9)  |
| C(2)–C(1)–C(6)–C(13) | -164.77(10) |
| C(7)–C(1)–C(6)–C(13) | 14.68(15)   |

|                         |             |
|-------------------------|-------------|
| C(4)–C(5)–C(6)–C(1)     | –10.95(15)  |
| C(4)–C(5)–C(6)–C(13)    | 156.60(10)  |
| C(5)–C(4)–C(11)–C(12)   | 77.88(12)   |
| C(3)–C(4)–C(11)–C(12)   | –89.99(12)  |
| C(4)–C(11)–C(12)–C(15)  | –59.92(11)  |
| C(1)–C(6)–C(13)–C(14)   | 90.00(11)   |
| C(5)–C(6)–C(13)–C(14)   | –77.07(12)  |
| C(6)–C(13)–C(14)–C(19)  | 60.33(12)   |
| C(11)–C(12)–C(15)–C(16) | –84.97(12)  |
| C(11)–C(12)–C(15)–C(20) | 79.74(12)   |
| C(20)–C(15)–C(16)–C(17) | –2.43(16)   |
| C(12)–C(15)–C(16)–C(17) | 162.37(10)  |
| C(15)–C(16)–C(17)–C(18) | –4.78(18)   |
| C(16)–C(17)–C(18)–C(19) | 4.65(18)    |
| C(17)–C(18)–C(19)–C(20) | 2.66(17)    |
| C(17)–C(18)–C(19)–C(14) | –162.43(11) |
| C(13)–C(14)–C(19)–C(18) | 84.39(12)   |
| C(13)–C(14)–C(19)–C(20) | –80.61(13)  |
| C(16)–C(15)–C(20)–C(19) | 10.01(16)   |
| C(12)–C(15)–C(20)–C(19) | –155.13(10) |
| C(18)–C(19)–C(20)–C(15) | –10.12(16)  |
| C(14)–C(19)–C(20)–C(15) | 155.41(10)  |

---

Symmetry transformations used to generate equivalent atoms:



### X-Ray Structural Data for *rac-11d*

Table 1. Crystal data and structure refinement for *rac-11d*

|                                   |                                                                                           |
|-----------------------------------|-------------------------------------------------------------------------------------------|
| Identification code               | <i>rac-11d</i>                                                                            |
| Empirical formula                 | C <sub>18</sub> H <sub>18</sub> O <sub>3</sub>                                            |
| Formula weight                    | 282.32                                                                                    |
| Temperature                       | 100(2) K                                                                                  |
| Wavelength                        | 1.54184 Å                                                                                 |
| Crystal system                    | Monoclinic                                                                                |
| Space group                       | P2 <sub>1</sub> /c (#14)                                                                  |
| Unit cell dimensions              | a = 13.4948(2) Å α = 90°.<br>b = 14.0951(2) Å β = 96.909(2)°.<br>c = 7.5300(1) Å γ = 90°. |
| Volume                            | 1421.88(3) Å <sup>3</sup>                                                                 |
| Z                                 | 4                                                                                         |
| Density (calculated)              | 1.319 Mg/m <sup>3</sup>                                                                   |
| Absorption coefficient            | 0.715 mm <sup>-1</sup>                                                                    |
| F(000)                            | 600                                                                                       |
| Crystal size                      | 0.2158 x 0.1231 x 0.0393 mm <sup>3</sup>                                                  |
| Theta range for data collection   | 3.30 to 76.47°.                                                                           |
| Index ranges                      | -16 ≤ h ≤ 17, -17 ≤ k ≤ 17, -9 ≤ l ≤ 9                                                    |
| Reflections collected             | 22791 <sup>a)</sup>                                                                       |
| Independent reflections           | 2970 [R(int) = 0.0327] <sup>a)</sup>                                                      |
| Completeness to theta = 76.47°    | 99.8 % <sup>a)</sup>                                                                      |
| Absorption correction             | Analytical                                                                                |
| Max. and min. transmission        | 0.975 and 0.890                                                                           |
| Refinement method                 | Full-matrix least-squares on F <sup>2</sup>                                               |
| Data / restraints / parameters    | 2970 / 0 / 194                                                                            |
| Goodness-of-fit on F <sup>2</sup> | 1.002                                                                                     |
| Final R indices [I > 2σ(I)]       | R1 = 0.0353, wR2 = 0.0955                                                                 |
| R indices (all data)              | R1 = 0.0454, wR2 = 0.0999                                                                 |
| Largest diff. peak and hole       | 0.253 and -0.223 e.Å <sup>-3</sup>                                                        |

<sup>a)</sup> This crystal is a non-merohedral twin. The refinement was done on an HKLF5 file. This prevents merging of equivalent reflections, so the number of unique reflections and the internal R-value cannot be determined.

Table 2. Atomic coordinates ( × 10<sup>4</sup>) and equivalent isotropic displacement parameters (Å<sup>2</sup> × 10<sup>3</sup>) for *rac-11d*. U(eq) is defined as one third of the trace of the orthogonalized U<sup>ij</sup> tensor.

| Atom | x       | y       | z       | U(eq) |
|------|---------|---------|---------|-------|
| C(1) | 1579(1) | 5579(1) | 6747(1) | 17(1) |
| C(7) | 746(1)  | 5172(1) | 7650(1) | 19(1) |
| O(1) | 839(1)  | 5151(1) | 9341(1) | 21(1) |
| O(2) | -33(1)  | 4868(1) | 6721(1) | 26(1) |
| C(2) | 1400(1) | 6458(1) | 5891(1) | 16(1) |
| O(3) | 515(1)  | 6869(1) | 6168(1) | 20(1) |
| C(8) | 326(1)  | 7816(1) | 5536(1) | 23(1) |
| C(3) | 2074(1) | 6816(1) | 4800(1) | 18(1) |
| C(4) | 2960(1) | 6323(1) | 4661(1) | 18(1) |
| C(5) | 3182(1) | 5514(1) | 5693(1) | 19(1) |

|       |         |         |         |       |
|-------|---------|---------|---------|-------|
| C(6)  | 2465(1) | 5088(1) | 6638(1) | 18(1) |
| C(9)  | 3571(1) | 6532(1) | 3147(1) | 22(1) |
| C(10) | 3240(1) | 5879(1) | 1489(1) | 23(1) |
| C(11) | 2569(1) | 4050(1) | 7114(1) | 22(1) |
| C(12) | 2198(1) | 3419(1) | 5445(1) | 24(1) |
| C(13) | 3351(1) | 4845(1) | 1991(1) | 23(1) |
| C(14) | 2616(1) | 4417(1) | 2885(1) | 22(1) |
| C(15) | 2823(1) | 3616(1) | 3957(1) | 23(1) |
| C(16) | 3732(1) | 3151(1) | 3891(1) | 27(1) |
| C(17) | 4428(1) | 3508(1) | 2843(2) | 29(1) |
| C(18) | 4255(1) | 4367(1) | 1955(1) | 28(1) |

Table 3. Bond lengths [Å] and angles [°] for *rac-11d*.

|                |            |
|----------------|------------|
| C(1)–C(6)      | 1.3930(12) |
| C(1)–C(2)      | 1.4037(12) |
| C(1)–C(7)      | 1.4962(11) |
| C(7)–O(1)      | 1.2646(11) |
| C(7)–O(2)      | 1.2650(12) |
| O(1)–H(1O1)    | 0.8400     |
| O(2)–H(1O2)    | 0.8400     |
| C(2)–O(3)      | 1.3664(10) |
| C(2)–C(3)      | 1.3915(12) |
| O(3)–C(8)      | 1.4300(10) |
| C(8)–H(8A)     | 0.9800     |
| C(8)–H(8B)     | 0.9800     |
| C(8)–H(8C)     | 0.9800     |
| C(3)–C(4)      | 1.3975(12) |
| C(3)–H(3)      | 0.9500     |
| C(4)–C(5)      | 1.3911(13) |
| C(4)–C(9)      | 1.5141(11) |
| C(5)–C(6)      | 1.4030(12) |
| C(5)–H(5)      | 0.9500     |
| C(6)–C(11)     | 1.5085(12) |
| C(9)–C(10)     | 1.5725(14) |
| C(9)–H(9A)     | 0.9900     |
| C(9)–H(9B)     | 0.9900     |
| C(10)–C(13)    | 1.5077(14) |
| C(10)–H(10A)   | 0.9900     |
| C(10)–H(10B)   | 0.9900     |
| C(11)–C(12)    | 1.5712(13) |
| C(11)–H(11A)   | 0.9900     |
| C(11)–H(11B)   | 0.9900     |
| C(12)–C(15)    | 1.5080(14) |
| C(12)–H(12A)   | 0.9900     |
| C(12)–H(12B)   | 0.9900     |
| C(13)–C(18)    | 1.3973(13) |
| C(13)–C(14)    | 1.4008(14) |
| C(14)–C(15)    | 1.3959(14) |
| C(14)–H(14)    | 0.9500     |
| C(15)–C(16)    | 1.3965(13) |
| C(16)–C(17)    | 1.3918(16) |
| C(16)–H(16)    | 0.9500     |
| C(17)–C(18)    | 1.3897(16) |
| C(17)–H(17)    | 0.9500     |
| C(18)–H(18)    | 0.9500     |
| C(6)–C(1)–C(2) | 120.83(8)  |

|                     |            |
|---------------------|------------|
| C(6)–C(1)–C(7)      | 122.25(8)  |
| C(2)–C(1)–C(7)      | 116.76(8)  |
| O(1)–C(7)–O(2)      | 121.58(8)  |
| O(1)–C(7)–C(1)      | 118.52(8)  |
| O(2)–C(7)–C(1)      | 119.89(8)  |
| C(7)–O(1)–H(101)    | 109.5      |
| C(7)–O(2)–H(102)    | 109.5      |
| O(3)–C(2)–C(3)      | 125.59(8)  |
| O(3)–C(2)–C(1)      | 114.13(8)  |
| C(3)–C(2)–C(1)      | 120.20(8)  |
| C(2)–O(3)–C(8)      | 117.96(7)  |
| O(3)–C(8)–H(8A)     | 109.5      |
| O(3)–C(8)–H(8B)     | 109.5      |
| H(8A)–C(8)–H(8B)    | 109.5      |
| O(3)–C(8)–H(8C)     | 109.5      |
| H(8A)–C(8)–H(8C)    | 109.5      |
| H(8B)–C(8)–H(8C)    | 109.5      |
| C(2)–C(3)–C(4)      | 119.28(8)  |
| C(2)–C(3)–H(3)      | 120.4      |
| C(4)–C(3)–H(3)      | 120.4      |
| C(5)–C(4)–C(3)      | 119.63(8)  |
| C(5)–C(4)–C(9)      | 118.71(8)  |
| C(3)–C(4)–C(9)      | 120.46(8)  |
| C(4)–C(5)–C(6)      | 121.26(8)  |
| C(4)–C(5)–H(5)      | 119.4      |
| C(6)–C(5)–H(5)      | 119.4      |
| C(1)–C(6)–C(5)      | 117.79(8)  |
| C(1)–C(6)–C(11)     | 121.58(8)  |
| C(5)–C(6)–C(11)     | 119.07(8)  |
| C(4)–C(9)–C(10)     | 110.80(7)  |
| C(4)–C(9)–H(9A)     | 109.5      |
| C(10)–C(9)–H(9A)    | 109.5      |
| C(4)–C(9)–H(9B)     | 109.5      |
| C(10)–C(9)–H(9B)    | 109.5      |
| H(9A)–C(9)–H(9B)    | 108.1      |
| C(13)–C(10)–C(9)    | 110.93(8)  |
| C(13)–C(10)–H(10A)  | 109.5      |
| C(9)–C(10)–H(10A)   | 109.5      |
| C(13)–C(10)–H(10B)  | 109.5      |
| C(9)–C(10)–H(10B)   | 109.5      |
| H(10A)–C(10)–H(10B) | 108.0      |
| C(6)–C(11)–C(12)    | 110.33(8)  |
| C(6)–C(11)–H(11A)   | 109.6      |
| C(12)–C(11)–H(11A)  | 109.6      |
| C(6)–C(11)–H(11B)   | 109.6      |
| C(12)–C(11)–H(11B)  | 109.6      |
| H(11A)–C(11)–H(11B) | 108.1      |
| C(15)–C(12)–C(11)   | 109.70(8)  |
| C(15)–C(12)–H(12A)  | 109.7      |
| C(11)–C(12)–H(12A)  | 109.7      |
| C(15)–C(12)–H(12B)  | 109.7      |
| C(11)–C(12)–H(12B)  | 109.7      |
| H(12A)–C(12)–H(12B) | 108.2      |
| C(18)–C(13)–C(14)   | 118.14(10) |
| C(18)–C(13)–C(10)   | 121.45(9)  |
| C(14)–C(13)–C(10)   | 118.84(9)  |
| C(15)–C(14)–C(13)   | 121.50(9)  |
| C(15)–C(14)–H(14)   | 119.2      |
| C(13)–C(14)–H(14)   | 119.2      |
| C(14)–C(15)–C(16)   | 118.34(9)  |

|                   |            |
|-------------------|------------|
| C(14)–C(15)–C(12) | 119.15(9)  |
| C(16)–C(15)–C(12) | 120.84(9)  |
| C(17)–C(16)–C(15) | 120.38(10) |
| C(17)–C(16)–H(16) | 119.8      |
| C(15)–C(16)–H(16) | 119.8      |
| C(18)–C(17)–C(16) | 120.16(9)  |
| C(18)–C(17)–H(17) | 119.9      |
| C(16)–C(17)–H(17) | 119.9      |
| C(17)–C(18)–C(13) | 120.49(10) |
| C(17)–C(18)–H(18) | 119.8      |
| C(13)–C(18)–H(18) | 119.8      |

Symmetry transformations used to generate equivalent atoms:

Table 4. Anisotropic displacement parameters ( $\text{\AA}^2 \times 10^3$ ) for *rac*-**11d**. The anisotropic displacement factor exponent takes the form:  $-2\pi^2 [ h^2 a^{*2} U^{11} + \dots + 2 h k a^* b^* U^{12} ]$

| Atom  | $U^{11}$ | $U^{22}$ | $U^{33}$ | $U^{23}$ | $U^{13}$ | $U^{12}$ |
|-------|----------|----------|----------|----------|----------|----------|
| C(1)  | 20(1)    | 18(1)    | 13(1)    | -1(1)    | 3(1)     | -3(1)    |
| C(7)  | 23(1)    | 16(1)    | 18(1)    | 2(1)     | 7(1)     | 1(1)     |
| O(1)  | 23(1)    | 26(1)    | 13(1)    | 0(1)     | 5(1)     | -4(1)    |
| O(2)  | 24(1)    | 39(1)    | 16(1)    | 2(1)     | 4(1)     | -12(1)   |
| C(2)  | 19(1)    | 17(1)    | 14(1)    | -3(1)    | 3(1)     | -1(1)    |
| O(3)  | 24(1)    | 17(1)    | 21(1)    | 2(1)     | 9(1)     | 2(1)     |
| C(8)  | 30(1)    | 18(1)    | 23(1)    | 2(1)     | 5(1)     | 4(1)     |
| C(3)  | 23(1)    | 16(1)    | 14(1)    | 0(1)     | 2(1)     | -4(1)    |
| C(4)  | 19(1)    | 21(1)    | 16(1)    | -1(1)    | 3(1)     | -6(1)    |
| C(5)  | 16(1)    | 24(1)    | 17(1)    | -1(1)    | 1(1)     | -2(1)    |
| C(6)  | 20(1)    | 19(1)    | 14(1)    | 1(1)     | 1(1)     | -1(1)    |
| C(9)  | 20(1)    | 28(1)    | 21(1)    | 3(1)     | 7(1)     | -5(1)    |
| C(10) | 22(1)    | 32(1)    | 17(1)    | 3(1)     | 6(1)     | 1(1)     |
| C(11) | 24(1)    | 21(1)    | 21(1)    | 4(1)     | 3(1)     | 2(1)     |
| C(12) | 25(1)    | 18(1)    | 28(1)    | 2(1)     | 1(1)     | 0(1)     |
| C(13) | 22(1)    | 31(1)    | 15(1)    | -3(1)    | 1(1)     | 2(1)     |
| C(14) | 19(1)    | 26(1)    | 19(1)    | -3(1)    | -1(1)    | 2(1)     |
| C(15) | 23(1)    | 23(1)    | 22(1)    | -5(1)    | -1(1)    | 0(1)     |
| C(16) | 28(1)    | 24(1)    | 26(1)    | -7(1)    | -4(1)    | 6(1)     |
| C(17) | 25(1)    | 35(1)    | 28(1)    | -10(1)   | -1(1)    | 10(1)    |
| C(18) | 23(1)    | 39(1)    | 21(1)    | -6(1)    | 4(1)     | 4(1)     |

Table 5. Hydrogen coordinates ( $\times 10^4$ ) and isotropic displacement parameters ( $\text{\AA}^2 \times 10^3$ ) for *rac*-**11d**.

| Atom                 | x    | y    | z    | U(eq) |
|----------------------|------|------|------|-------|
| H(1O1) <sup>a)</sup> | 286  | 5021 | 9687 | 31    |
| H(1O2) <sup>a)</sup> | 34   | 4915 | 5630 | 39    |
| H(8A)                | 874  | 8230 | 6033 | 35    |
| H(8B)                | -302 | 8043 | 5915 | 35    |
| H(8C)                | 278  | 7824 | 4227 | 35    |
| H(3)                 | 1934 | 7389 | 4156 | 21    |
| H(5)                 | 3831 | 5246 | 5758 | 23    |
| H(9A)                | 4287 | 6426 | 3559 | 27    |
| H(9B)                | 3483 | 7206 | 2790 | 27    |
| H(10A)               | 2535 | 6012 | 1033 | 28    |
| H(10B)               | 3654 | 6022 | 523  | 28    |
| H(11A)               | 2171 | 3905 | 8103 | 26    |

|        |      |      |      |    |
|--------|------|------|------|----|
| H(11B) | 3277 | 3904 | 7526 | 26 |
| H(12A) | 2250 | 2740 | 5780 | 28 |
| H(12B) | 1489 | 3562 | 5036 | 28 |
| H(14)  | 1962 | 4677 | 2760 | 26 |
| H(16)  | 3875 | 2587 | 4565 | 32 |
| H(17)  | 5023 | 3163 | 2734 | 35 |
| H(18)  | 4756 | 4631 | 1318 | 33 |

<sup>a)</sup> s.o.f. = 0.5 (s.o.f.: site occupation factor)

Table 6. Torsion angles [°] for *rac*-**11d**.

|                         |             |
|-------------------------|-------------|
| C(6)–C(1)–C(7)–O(1)     | 75.25(11)   |
| C(2)–C(1)–C(7)–O(1)     | –109.27(10) |
| C(6)–C(1)–C(7)–O(2)     | –105.42(11) |
| C(2)–C(1)–C(7)–O(2)     | 70.06(11)   |
| C(6)–C(1)–C(2)–O(3)     | –177.87(8)  |
| C(7)–C(1)–C(2)–O(3)     | 6.58(11)    |
| C(6)–C(1)–C(2)–C(3)     | 5.17(13)    |
| C(7)–C(1)–C(2)–C(3)     | –170.38(8)  |
| C(3)–C(2)–O(3)–C(8)     | –10.90(12)  |
| C(1)–C(2)–O(3)–C(8)     | 172.33(7)   |
| O(3)–C(2)–C(3)–C(4)     | 179.20(8)   |
| C(1)–C(2)–C(3)–C(4)     | –4.21(12)   |
| C(2)–C(3)–C(4)–C(5)     | –3.77(13)   |
| C(2)–C(3)–C(4)–C(9)     | 163.54(8)   |
| C(3)–C(4)–C(5)–C(6)     | 11.09(13)   |
| C(9)–C(4)–C(5)–C(6)     | –156.44(8)  |
| C(2)–C(1)–C(6)–C(5)     | 1.87(12)    |
| C(7)–C(1)–C(6)–C(5)     | 177.17(8)   |
| C(2)–C(1)–C(6)–C(11)    | –163.71(8)  |
| C(7)–C(1)–C(6)–C(11)    | 11.59(13)   |
| C(4)–C(5)–C(6)–C(1)     | –10.02(13)  |
| C(4)–C(5)–C(6)–C(11)    | 155.94(9)   |
| C(5)–C(4)–C(9)–C(10)    | 76.90(10)   |
| C(3)–C(4)–C(9)–C(10)    | –90.52(10)  |
| C(4)–C(9)–C(10)–C(13)   | –58.40(10)  |
| C(1)–C(6)–C(11)–C(12)   | 86.60(10)   |
| C(5)–C(6)–C(11)–C(12)   | –78.80(10)  |
| C(6)–C(11)–C(12)–C(15)  | 61.04(10)   |
| C(9)–C(10)–C(13)–C(18)  | –86.17(10)  |
| C(9)–C(10)–C(13)–C(14)  | 79.31(10)   |
| C(18)–C(13)–C(14)–C(15) | 10.25(14)   |
| C(10)–C(13)–C(14)–C(15) | –155.71(9)  |
| C(13)–C(14)–C(15)–C(16) | –10.55(14)  |
| C(13)–C(14)–C(15)–C(12) | 154.87(9)   |
| C(11)–C(12)–C(15)–C(14) | –80.39(10)  |
| C(11)–C(12)–C(15)–C(16) | 84.65(11)   |
| C(14)–C(15)–C(16)–C(17) | 2.97(14)    |
| C(12)–C(15)–C(16)–C(17) | –162.19(9)  |
| C(15)–C(16)–C(17)–C(18) | 4.64(15)    |
| C(16)–C(17)–C(18)–C(13) | –4.94(15)   |
| C(14)–C(13)–C(18)–C(17) | –2.37(14)   |
| C(10)–C(13)–C(18)–C(17) | 163.20(9)   |

Symmetry transformations used to generate equivalent atoms:

Table 7. Hydrogen bonds for *rac*-**11d** [Å and °].

| D–H...A              | d(D–H) | d(H...A) | d(D...A)   | <(DHA) |
|----------------------|--------|----------|------------|--------|
| O(2)–H(1O2)...O(2)#1 | 0.84   | 1.80     | 2.6305(14) | 171.9  |
| O(1)–H(1O1)...O(1)#2 | 0.84   | 1.78     | 2.6139(13) | 172.4  |

Symmetry transformations used to generate equivalent atoms:

#1  $-x, -y+1, -z+1$  #2  $-x, -y+1, -z+2$
